# Supplementary material
Source: HighWire-hosted journal article supplement (doi:10.1101/rna.079652.123)
Supplement: Supplemental_seq_Tables.xlsx [file Supplemental_seq_Tables.xlsx]

## Sheet: Index
Table Index
Type	Table	Contents
Workflow	W.1	Read trimming
	W.2	Read mapping
	W.3	Filtering read mappings
	W.4	Library specificity
Stats	T.1	Repeatabiltity of DMS modification
	T.2	Comparison of average mean reactivity
	T.3	Correlation of Δ reactivity to Δ abundance
	T.4	Statistics for the four growth temperatures
Data	D.1	Whole Transcript reactivity metrics
	D.2	5’UTR reactivity metrics
	D.3	CDS reactivity metrics
	D.4	3’UTR reactivity metrics
	D.5	Abundances (TPM)

## Sheet: W.1
Table W.1 Read trimming
Library	Growth Temp	DMS	Rep	Raw Reads	Filtered Reads	Retained %
1_S1_R1_001	23	-	1	28029587	23173337	0.826746
2_S2_R1_001	23	+	1	37696956	31733607	0.841808
3_S3_R1_001	23	-	2	32816004	26696303	0.813515
4_S4_R1_001	23	+	2	30366785	25839067	0.850899
5_S5_R1_001	23	-	3	27265480	23606856	0.865815
6_S6_R1_001	23	+	3	26836998	24778225	0.923286
7_S1_R1_001	30	-	1	21665542	14428366	0.665959
8_S2_R1_001	30	+	1	35802535	28555509	0.797583
9_S3_R1_001	30	-	2	26538788	14749624	0.555776
10_S4_R1_001	30	+	2	121764800	98978208	0.812864
11_S5_R1_001	30	-	3	26915802	20571436	0.764288
12_S6_R1_001	30	+	3	31220190	23754722	0.760877
13_S7_R1_001	37	-	1	28180961	19501083	0.691995
14_S8_R1_001	37	+	1	24652396	16385821	0.664675
15_S9_R1_001	37	-	2	23583670	9234387	0.391559
16_S10_R1_001	37	+	2	23341938	15453249	0.662038
17_S11_R1_001	37	-	3	34201231	26245318	0.767379
18_S12_R1_001	37	+	3	31237238	23329104	0.746836
19_S7_R1_001	42	-	1	21723510	11994543	0.552146
20_S8_R1_001	42	+	1	19697332	7731378	0.392509
21_S9_R1_001	42	-	2	20727219	8885347	0.42868
22_S10_R1_001	24	+	2	17833256	8254088	0.462848
23_S11_R1_001	24	-	3	30893183	25427753	0.823086
24_S12_R1_001	24	+	3	33921397	26096211	0.769314
		Total		756912798	555403542	0.733775

## Sheet: W.2
Table W.2 read mapping
fastq	sam	in_reads	mapped_fract	unique_reads	unique_fract	multi_reads	multi_fract	unmapped_reads	unmapped_fract	bowtie2_command
1_S1_R1_001_trimmed.fastq	1_S1_R1_001_trimmed_mapped.sam	23173337	0.56	12712455	0.55	248296	0.011	10212586	0.44	bowtie2 -a -p 4 --no-unal -x /usr/local/biocore/Bio_Indexes/bowtie/subtilis_elizabeth_illumina -q 1_S1_R1_001_trimmed.fastq > 1_S1_R1_001_trimmed_mapped.sam
2_S2_R1_001_trimmed.fastq	2_S2_R1_001_trimmed_mapped.sam	31733607	0.32	10135880	0.32	164745	0.005	21432982	0.68	bowtie2 -a -p 4 --no-unal -x /usr/local/biocore/Bio_Indexes/bowtie/subtilis_elizabeth_illumina -q 2_S2_R1_001_trimmed.fastq > 2_S2_R1_001_trimmed_mapped.sam
3_S3_R1_001_trimmed.fastq	3_S3_R1_001_trimmed_mapped.sam	26696303	0.47	12382057	0.46	234830	0.009	14079416	0.53	bowtie2 -a -p 4 --no-unal -x /usr/local/biocore/Bio_Indexes/bowtie/subtilis_elizabeth_illumina -q 3_S3_R1_001_trimmed.fastq > 3_S3_R1_001_trimmed_mapped.sam
4_S4_R1_001_trimmed.fastq	4_S4_R1_001_trimmed_mapped.sam	25839067	0.47	12030202	0.47	194353	0.008	13614512	0.53	bowtie2 -a -p 4 --no-unal -x /usr/local/biocore/Bio_Indexes/bowtie/subtilis_elizabeth_illumina -q 4_S4_R1_001_trimmed.fastq > 4_S4_R1_001_trimmed_mapped.sam
5_S5_R1_001_trimmed.fastq	5_S5_R1_001_trimmed_mapped.sam	23606856	0.57	13112265	0.56	247977	0.011	10246614	0.43	bowtie2 -a -p 4 --no-unal -x /usr/local/biocore/Bio_Indexes/bowtie/subtilis_elizabeth_illumina -q 5_S5_R1_001_trimmed.fastq > 5_S5_R1_001_trimmed_mapped.sam
6_S6_R1_001_trimmed.fastq	6_S6_R1_001_trimmed_mapped.sam	24778225	0.73	17844040	0.72	265858	0.011	6668327	0.27	bowtie2 -a -p 4 --no-unal -x /usr/local/biocore/Bio_Indexes/bowtie/subtilis_elizabeth_illumina -q 6_S6_R1_001_trimmed.fastq > 6_S6_R1_001_trimmed_mapped.sam
7_S1_R1_001_trimmed.fastq	7_S1_R1_001_trimmed_mapped.sam	14428366	0.25	3541090	0.25	58404	0.004	10828872	0.75	bowtie2 -a -p 4 --no-unal -x /usr/local/biocore/Bio_Indexes/bowtie/subtilis_elizabeth_illumina -q 7_S1_R1_001_trimmed.fastq > 7_S1_R1_001_trimmed_mapped.sam
8_S2_R1_001_trimmed.fastq	8_S2_R1_001_trimmed_mapped.sam	28555509	0.43	12167855	0.43	185450	0.007	16202204	0.57	bowtie2 -a -p 4 --no-unal -x /usr/local/biocore/Bio_Indexes/bowtie/subtilis_elizabeth_illumina -q 8_S2_R1_001_trimmed.fastq > 8_S2_R1_001_trimmed_mapped.sam
9_S3_R1_001_trimmed.fastq	9_S3_R1_001_trimmed_mapped.sam	14749624	0.33	4786823	0.32	94581	0.006	9868220	0.67	bowtie2 -a -p 4 --no-unal -x /usr/local/biocore/Bio_Indexes/bowtie/subtilis_elizabeth_illumina -q 9_S3_R1_001_trimmed.fastq > 9_S3_R1_001_trimmed_mapped.sam
10_S4_R1_001_trimmed.fastq	10_S4_R1_001_trimmed_mapped.sam	98978208	0.45	43877586	0.44	673820	0.007	54426802	0.55	bowtie2 -a -p 4 --no-unal -x /usr/local/biocore/Bio_Indexes/bowtie/subtilis_elizabeth_illumina -q 10_S4_R1_001_trimmed.fastq > 10_S4_R1_001_trimmed_mapped.sam
11_S5_R1_001_trimmed.fastq	11_S5_R1_001_trimmed_mapped.sam	20571436	0.4	8043840	0.39	158533	0.008	12369063	0.6	bowtie2 -a -p 4 --no-unal -x /usr/local/biocore/Bio_Indexes/bowtie/subtilis_elizabeth_illumina -q 11_S5_R1_001_trimmed.fastq > 11_S5_R1_001_trimmed_mapped.sam
12_S6_R1_001_trimmed.fastq	12_S6_R1_001_trimmed_mapped.sam	23754722	0.52	12194554	0.51	194481	0.008	11365687	0.48	bowtie2 -a -p 4 --no-unal -x /usr/local/biocore/Bio_Indexes/bowtie/subtilis_elizabeth_illumina -q 12_S6_R1_001_trimmed.fastq > 12_S6_R1_001_trimmed_mapped.sam
13_S7_R1_001_trimmed.fastq	13_S7_R1_001_trimmed_mapped.sam	19501083	0.39	7477830	0.38	137614	0.007	11885639	0.61	bowtie2 -a -p 4 --no-unal -x /usr/local/biocore/Bio_Indexes/bowtie/subtilis_elizabeth_illumina -q 13_S7_R1_001_trimmed.fastq > 13_S7_R1_001_trimmed_mapped.sam
14_S8_R1_001_trimmed.fastq	14_S8_R1_001_trimmed_mapped.sam	16385821	0.32	5096018	0.31	101938	0.006	11187865	0.68	bowtie2 -a -p 4 --no-unal -x /usr/local/biocore/Bio_Indexes/bowtie/subtilis_elizabeth_illumina -q 14_S8_R1_001_trimmed.fastq > 14_S8_R1_001_trimmed_mapped.sam
15_S9_R1_001_trimmed.fastq	15_S9_R1_001_trimmed_mapped.sam	9234387	0.58	5213276	0.56	104190	0.011	3916921	0.42	bowtie2 -a -p 4 --no-unal -x /usr/local/biocore/Bio_Indexes/bowtie/subtilis_elizabeth_illumina -q 15_S9_R1_001_trimmed.fastq > 15_S9_R1_001_trimmed_mapped.sam
16_S10_R1_001_trimmed.fastq	16_S10_R1_001_trimmed_mapped.sam	15453249	0.51	7699345	0.5	141080	0.009	7612824	0.49	bowtie2 -a -p 4 --no-unal -x /usr/local/biocore/Bio_Indexes/bowtie/subtilis_elizabeth_illumina -q 16_S10_R1_001_trimmed.fastq > 16_S10_R1_001_trimmed_mapped.sam
17_S11_R1_001_trimmed.fastq	17_S11_R1_001_trimmed_mapped.sam	26245318	0.36	9280766	0.35	150767	0.006	16813785	0.64	bowtie2 -a -p 4 --no-unal -x /usr/local/biocore/Bio_Indexes/bowtie/subtilis_elizabeth_illumina -q 17_S11_R1_001_trimmed.fastq > 17_S11_R1_001_trimmed_mapped.sam
18_S12_R1_001_trimmed.fastq	18_S12_R1_001_trimmed_mapped.sam	23329104	0.45	10249730	0.44	192077	0.008	12887297	0.55	bowtie2 -a -p 4 --no-unal -x /usr/local/biocore/Bio_Indexes/bowtie/subtilis_elizabeth_illumina -q 18_S12_R1_001_trimmed.fastq > 18_S12_R1_001_trimmed_mapped.sam
19_S7_R1_001_trimmed.fastq	19_S7_R1_001_trimmed_mapped.sam	11994543	0.51	6013354	0.5	123295	0.01	5857894	0.49	bowtie2 -a -p 4 --no-unal -x /usr/local/biocore/Bio_Indexes/bowtie/subtilis_elizabeth_illumina -q 19_S7_R1_001_trimmed.fastq > 19_S7_R1_001_trimmed_mapped.sam
20_S8_R1_001_trimmed.fastq	20_S8_R1_001_trimmed_mapped.sam	7731378	0.53	3987873	0.52	94385	0.012	3649120	0.47	bowtie2 -a -p 4 --no-unal -x /usr/local/biocore/Bio_Indexes/bowtie/subtilis_elizabeth_illumina -q 20_S8_R1_001_trimmed.fastq > 20_S8_R1_001_trimmed_mapped.sam
21_S9_R1_001_trimmed.fastq	21_S9_R1_001_trimmed_mapped.sam	8885347	0.38	3297461	0.37	67814	0.008	5520072	0.62	bowtie2 -a -p 4 --no-unal -x /usr/local/biocore/Bio_Indexes/bowtie/subtilis_elizabeth_illumina -q 21_S9_R1_001_trimmed.fastq > 21_S9_R1_001_trimmed_mapped.sam
22_S10_R1_001_trimmed.fastq	22_S10_R1_001_trimmed_mapped.sam	8254088	0.52	4234855	0.51	97741	0.012	3921492	0.48	bowtie2 -a -p 4 --no-unal -x /usr/local/biocore/Bio_Indexes/bowtie/subtilis_elizabeth_illumina -q 22_S10_R1_001_trimmed.fastq > 22_S10_R1_001_trimmed_mapped.sam
23_S11_R1_001_trimmed.fastq	23_S11_R1_001_trimmed_mapped.sam	25427753	0.55	13683875	0.54	236599	0.009	11507279	0.45	bowtie2 -a -p 4 --no-unal -x /usr/local/biocore/Bio_Indexes/bowtie/subtilis_elizabeth_illumina -q 23_S11_R1_001_trimmed.fastq > 23_S11_R1_001_trimmed_mapped.sam
24_S12_R1_001_trimmed.fastq	24_S12_R1_001_trimmed_mapped.sam	26096211	0.47	12140963	0.47	248486	0.01	13706762	0.53	bowtie2 -a -p 4 --no-unal -x /usr/local/biocore/Bio_Indexes/bowtie/subtilis_elizabeth_illumina -q 24_S12_R1_001_trimmed.fastq > 24_S12_R1_001_trimmed_mapped.sam

## Sheet: W.3
Table W.3 Filtering read mappings
in_sam	sam_lines	filtered_lines	sam_filter_flag	flag_options	mismatches_and_first_mismatch	mismatches	first_mismatch	header_lines	max_mismatch	out_sam	out_sam_lines
1_S1_R1_001_trimmed_mapped.sam	13213765	12891887	20	unmapped reverse_strand	509751	608066	3440660	4177	3	1_S1_R1_001_trimmed_mapped_filtered.sam	8329233
2_S2_R1_001_trimmed_mapped.sam	10469913	10258543	20	unmapped reverse_strand	235482	362586	1670086	4177	3	2_S2_R1_001_trimmed_mapped_filtered.sam	7986212
3_S3_R1_001_trimmed_mapped.sam	12856480	12553536	20	unmapped reverse_strand	600567	816160	3041474	4177	3	3_S3_R1_001_trimmed_mapped_filtered.sam	8091158
4_S4_R1_001_trimmed_mapped.sam	12423524	12203227	20	unmapped reverse_strand	347129	638142	1901211	4177	3	4_S4_R1_001_trimmed_mapped_filtered.sam	9312568
5_S5_R1_001_trimmed_mapped.sam	13612791	13288869	20	unmapped reverse_strand	658706	853737	3063190	4177	3	5_S5_R1_001_trimmed_mapped_filtered.sam	8709059
6_S6_R1_001_trimmed_mapped.sam	18380506	18063892	20	unmapped reverse_strand	548731	998879	2726036	4177	3	6_S6_R1_001_trimmed_mapped_filtered.sam	13786069
7_S1_R1_001_trimmed_mapped.sam	3662233	3581542	20	unmapped reverse_strand	158668	194565	892258	4177	3	7_S1_R1_001_trimmed_mapped_filtered.sam	2331874
8_S2_R1_001_trimmed_mapped.sam	12543313	12317465	20	unmapped reverse_strand	342941	672792	1779533	4177	3	8_S2_R1_001_trimmed_mapped_filtered.sam	9518022
9_S3_R1_001_trimmed_mapped.sam	4980315	4862950	20	unmapped reverse_strand	190345	252223	1310970	4177	3	9_S3_R1_001_trimmed_mapped_filtered.sam	3105235
10_S4_R1_001_trimmed_mapped.sam	45230839	44428739	20	unmapped reverse_strand	1328525	2768879	6034306	4177	3	10_S4_R1_001_trimmed_mapped_filtered.sam	34292852
11_S5_R1_001_trimmed_mapped.sam	8365397	8166393	20	unmapped reverse_strand	270459	354124	2048341	4177	3	11_S5_R1_001_trimmed_mapped_filtered.sam	5489292
12_S6_R1_001_trimmed_mapped.sam	12588086	12348337	20	unmapped reverse_strand	226185	456810	1672060	4177	3	12_S6_R1_001_trimmed_mapped_filtered.sam	9989105
13_S7_R1_001_trimmed_mapped.sam	7757597	7599070	20	unmapped reverse_strand	155541	159478	2245681	4177	3	13_S7_R1_001_trimmed_mapped_filtered.sam	5034193
14_S8_R1_001_trimmed_mapped.sam	5304643	5137411	20	unmapped reverse_strand	77152	144366	713804	4177	3	14_S8_R1_001_trimmed_mapped_filtered.sam	4197912
15_S9_R1_001_trimmed_mapped.sam	5426213	5306590	20	unmapped reverse_strand	60581	48176	1541704	4177	3	15_S9_R1_001_trimmed_mapped_filtered.sam	3651952
16_S10_R1_001_trimmed_mapped.sam	7986025	7827068	20	unmapped reverse_strand	158925	337022	1063787	4177	3	16_S10_R1_001_trimmed_mapped_filtered.sam	6263157
17_S11_R1_001_trimmed_mapped.sam	9586833	9404068	20	unmapped reverse_strand	235618	252494	2402270	4177	3	17_S11_R1_001_trimmed_mapped_filtered.sam	6509509
18_S12_R1_001_trimmed_mapped.sam	10638601	10400149	20	unmapped reverse_strand	173115	276018	1648930	4177	3	18_S12_R1_001_trimmed_mapped_filtered.sam	8297909
19_S7_R1_001_trimmed_mapped.sam	6264356	6105054	20	unmapped reverse_strand	133832	128927	1562027	4177	3	19_S7_R1_001_trimmed_mapped_filtered.sam	4276091
20_S8_R1_001_trimmed_mapped.sam	4181260	3934354	20	unmapped reverse_strand	50617	84334	566919	4177	3	20_S8_R1_001_trimmed_mapped_filtered.sam	3228307
21_S9_R1_001_trimmed_mapped.sam	3437435	3347209	20	unmapped reverse_strand	85950	98382	933166	4177	3	21_S9_R1_001_trimmed_mapped_filtered.sam	2225534
22_S10_R1_001_trimmed_mapped.sam	4434765	4292469	20	unmapped reverse_strand	72246	140568	622686	4177	3	22_S10_R1_001_trimmed_mapped_filtered.sam	3452792
23_S11_R1_001_trimmed_mapped.sam	14161968	13783586	20	unmapped reverse_strand	461446	656013	3753797	4177	3	23_S11_R1_001_trimmed_mapped_filtered.sam	8908153
24_S12_R1_001_trimmed_mapped.sam	12642765	12311349	20	unmapped reverse_strand	251553	534600	1677117	4177	3	24_S12_R1_001_trimmed_mapped_filtered.sam	9843902

## Sheet: W.4
Table W.4 DMS specificity
(-) DMS
base	23_count	23_specificity	30_count	30_specificity	37_count	37_specificity	42_count	42_specificity
A	7399531	0.302215	3954966	0.369781	4530701	0.301605	5363804	0.354787
T	7931912	0.323959	3168915	0.296287	3929459	0.261581	4354194	0.288006
G	3505155	0.143159	1801746	0.16846	1828364	0.121713	2275461	0.150509
C	5647722	0.230667	1769791	0.165472	4733459	0.315102	3124935	0.206698
(+) DMS
base	23_count	23_specificity	30_count	30_specificity	37_count	37_specificity	42_count	42_specificity
A	17944865	0.584454	34759048	0.652293	12308110	0.659303	10584903	0.645178
T	4757276	0.154942	6451612	0.121072	1569765	0.0840869	1794757	0.109395
G	2371051	0.0772238	4244764	0.0796578	1207330	0.0646725	1367987	0.0833824
C	5630436	0.18338	7832039	0.146977	3583167	0.191938	2658539	0.162045

## Sheet: T.1
T.1 Repeatability of DMS Modification
Treatment	Replicate A	Replicate B	r	p	n
23°C	1	2	0.93	<2.2E-016	1183974
	2	3	0.94	<2.2E-016	1183974
	3	1	0.82	<2.2E-016	1183974
30°C	1	2	0.95	<2.2E-016	1313501
	2	3	0.93	<2.2E-016	1313501
	3	1	0.96	<2.2E-016	1313501
37°C	1	2	0.89	<2.2E-016	1032878
	2	3	0.94	<2.2E-016	1032878
	3	1	0.87	<2.2E-016	1032878
42°C	1	2	0.95	<2.2E-016	1051282
	2	3	0.92	<2.2E-016	1051282
	3	1	0.92	<2.2E-016	1051282

## Sheet: T.2
T.2 Comparison of average mean reactivity
	Temperature 1	Temperature 2	Mean 1	Mean 2	t.test p	ks.test p	n
Whole Transcript	23°C	30°C	0.267949	0.317415	< 2.2e-16	< 2.2e-16	1953
5’UTR	23°C	30°C	0.288441	0.316157	3.136e-05	0.002111	799
CDS	23°C	30°C	0.267693	0.317765	< 2.2e-16	< 2.2e-16	1952
3’UTR	23°C	30°C	0.16303	0.197151	0.0006597	0.0001843	291
Whole Transcript	30°C	37°C	0.317415	0.362751	< 2.2e-16	< 2.2e-16	1953
5’UTR	30°C	37°C	0.316157	0.331334	0.07019	0.01011	799
CDS	30°C	37°C	0.317765	0.365734	< 2.2e-16	< 2.2e-16	1952
3’UTR	30°C	37°C	0.197151	0.219321	0.05828	0.1632	291
Whole Transcript	37°C	42°C	0.362751	0.342953	5.413e-11	2.918e-06	1953
5’UTR	37°C	42°C	0.331334	0.363849	0.001592	0.02968	799
CDS	37°C	42°C	0.365734	0.342869	1.874e-13	4.858e-08	1952
3’UTR	37°C	42°C	0.219321	0.273994	0.0005193	0.0297	291

## Sheet: T.3
T.3 Correlation of Δ reactivity to Δ abundance
	Temperature 1	Temperature 2	r	p	n
Whole Transcript	23°C	30°C	-0.741521	< 2.2e-16	1953
5’UTR	23°C	30°C	-0.223701	1.61e-10	799
CDS	23°C	30°C	-0.70068	< 2.2e-16	1952
3’UTR	23°C	30°C	-0.0905005	0.1235	291
Whole Transcript	30°C	37°C	-0.634978	< 2.2e-16	1953
5’UTR	30°C	37°C	-0.215534	7.491e-10	799
CDS	30°C	37°C	-0.612688	< 2.2e-16	1952
3’UTR	30°C	37°C	-0.16174	0.005685	291
Whole Transcript	37°C	42°C	-0.680452	< 2.2e-16	1953
5’UTR	37°C	42°C	-0.21643	6.347e-10	799
CDS	37°C	42°C	-0.660603	< 2.2e-16	1952
3’UTR	37°C	42°C	-0.123869	0.03468	291

## Sheet: T.4
T.4 Statistics for the four growth temperatures
Transcriptome-wide
Temperature	n	min	max	median	q1	q3	iqr	mad	mean	sd	se	ci
23°C	1953	0.124	0.379	0.271	0.245	0.294	0.049	0.036	0.268	0.038	0.001	0.002
30°C	1953	0.105	0.722	0.318	0.281	0.353	0.072	0.053	0.317	0.06	0.001	0.003
37°C	1953	0.102	0.983	0.357	0.298	0.417	0.119	0.089	0.363	0.098	0.002	0.004
42°C	1953	0.095	0.805	0.343	0.28	0.396	0.117	0.086	0.343	0.09	0.002	0.004
5' UTR
Temperature	n	min	max	median	q1	q3	iqr	mad	mean	sd	se	ci
23°C	799	0.013	0.845	0.281	0.204	0.362	0.158	0.117	0.288	0.124	0.004	0.009
30°C	799	0.032	0.858	0.303	0.221	0.393	0.172	0.129	0.316	0.141	0.005	0.01
37°C	799	0.006	1.397	0.305	0.19	0.431	0.241	0.176	0.331	0.19	0.007	0.013
42°C	799	0.004	1.622	0.327	0.208	0.458	0.25	0.187	0.364	0.22	0.008	0.015
CDS
Temperature	n	min	max	median	q1	q3	iqr	mad	mean	sd	se	ci
23°C	1952	0.089	0.433	0.27	0.243	0.294	0.05	0.037	0.268	0.041	0.001	0.002
30°C	1952	0.088	0.689	0.319	0.281	0.353	0.072	0.053	0.318	0.062	0.001	0.003
37°C	1952	0.058	1.083	0.36	0.298	0.423	0.125	0.093	0.366	0.101	0.002	0.004
42°C	1952	0.038	0.916	0.343	0.278	0.398	0.12	0.087	0.343	0.092	0.002	0.004
3' UTR
Temperature	n	min	max	median	q1	q3	iqr	mad	mean	sd	se	ci
23°C	291	0.007	0.638	0.128	0.07	0.231	0.16	0.107	0.163	0.121	0.007	0.014
30°C	291	0.005	0.614	0.183	0.1	0.272	0.172	0.128	0.197	0.12	0.007	0.014
37°C	291	0.005	1.145	0.183	0.099	0.304	0.206	0.144	0.219	0.159	0.009	0.108
42°C	291	0.006	1.693	0.228	0.115	0.377	0.262	0.183	0.274	0.214	0.013	0.025

## Sheet: D.1
D.1 Whole Transcript reactivity metrics
transcript	23C_max	23C_average	23C_sd	23C_gini	30C_max	30C_average	30C_sd	30C_gini	37C_max	37C_average	37C_sd	37C_gini	42C_max	42C_average	42C_sd	42C_gini
ILL.ydiF-BSU05950.7~1935	2.269	0.247151	0.37537	0.724274	1.485	0.284012	0.36302	0.657964	2.921	0.301514	0.475973	0.736467	2.602	0.333308	0.553893	0.758311
ILL.codY-BSU16170.40~819	1.716	0.29129	0.358996	0.63699	1.85	0.326007	0.418787	0.656359	2.396	0.390563	0.469793	0.628549	1.901	0.373817	0.460007	0.642061
ILL.yqfG-BSU25320.1~474	1.426	0.281868	0.360472	0.656715	1.928	0.408511	0.460637	0.603216	2.724	0.496822	0.592203	0.622347	2.008	0.413749	0.494787	0.629251
ILL.copZ-BSU33510.3~212	1.778	0.263553	0.384109	0.705864	1.512	0.308904	0.379663	0.641731	2.05	0.419606	0.538442	0.658627	1.524	0.360894	0.417539	0.61692
ILL.yhdZ-BSU09650.13~756	2.113	0.172271	0.368097	0.835489	1.941	0.230918	0.390962	0.764464	3.251	0.209279	0.49475	0.860182	2.093	0.186603	0.382751	0.824876
ILL.pupG-BSU23490.1~816	1.841	0.31234	0.375547	0.630436	1.609	0.328114	0.391703	0.628348	1.589	0.333085	0.390008	0.616572	1.553	0.333464	0.387818	0.619117
ILL.atpD-BSU36810.26~1447	2.148	0.313592	0.371043	0.620288	2.075	0.340928	0.426685	0.645877	2.104	0.425753	0.471992	0.594573	2.068	0.376479	0.423778	0.599389
ILL.efp-BSU24450.25~582	1.688	0.298977	0.36982	0.643887	1.532	0.307132	0.365497	0.627102	1.851	0.317155	0.392939	0.640546	1.527	0.295481	0.345768	0.617251
ILL.csrA-BSU35370.1~225	1.582	0.231628	0.372536	0.747552	1.326	0.257269	0.373309	0.71007	1.762	0.257241	0.417758	0.749414	1.274	0.217166	0.326077	0.72422
ILL.gntZ-BSU40080.19~1425	1.772	0.293252	0.36652	0.646041	1.623	0.302442	0.363671	0.629635	1.59	0.312464	0.370528	0.62635	2.141	0.328168	0.41909	0.653027
ILL.rsbRB-BSU13200.12~845	1.875	0.269305	0.363624	0.6793	1.504	0.353313	0.397256	0.60494	2.163	0.360482	0.446728	0.641725	1.765	0.305081	0.405176	0.67269
ILL.yfhO-BSU08610.72~2657	2.659	0.251811	0.384668	0.723274	1.839	0.294032	0.389072	0.670638	1.748	0.25572	0.342882	0.672022	2.221	0.277546	0.38435	0.687297
ILL.yvrA-BSU33160.1~1329	2.383	0.25149	0.385633	0.724241	2.364	0.321257	0.421038	0.662354	1.996	0.302646	0.457107	0.721887	2.553	0.309658	0.492601	0.739949
ILL.yqeK-BSU25630.1~561	1.527	0.27189	0.358386	0.669169	1.727	0.309649	0.381802	0.639481	2.888	0.357248	0.523597	0.703919	2.315	0.363848	0.531601	0.711906
ILL.sipU-BSU04010.135~698	1.602	0.247677	0.364295	0.711968	1.588	0.269764	0.363328	0.676527	1.817	0.289123	0.479833	0.760966	1.425	0.243447	0.345185	0.70151
ILL.ypuA-BSU23370.72~944	1.636	0.285037	0.359913	0.650423	1.73	0.306713	0.371358	0.634394	1.762	0.347153	0.417885	0.630094	1.765	0.32151	0.398321	0.641826
ILL.yfiR-BSU08370.1~618	1.538	0.288362	0.372147	0.661641	1.644	0.378577	0.415216	0.592273	2.752	0.392212	0.588081	0.716839	2.117	0.339744	0.513587	0.724341
ILL.fabI-BSU11720.42~818	1.546	0.300123	0.362518	0.629272	1.644	0.301045	0.366724	0.636297	1.526	0.297153	0.33015	0.59017	1.692	0.309286	0.361667	0.618615
ILL.rbsB-BSU35960.12~929	1.687	0.289488	0.360109	0.644462	2.24	0.366166	0.469475	0.652194	2.279	0.459633	0.545703	0.626028	1.927	0.358994	0.42129	0.616229
ILL.yhfH-BSU10230.5~145	1.827	0.168069	0.377956	0.848935	1.173	0.260655	0.318467	0.635764	2.542	0.234552	0.520476	0.841692	1.767	0.219207	0.374834	0.753584
ILL.walK-BSU40400.2~1837	1.587	0.261157	0.363282	0.691985	1.847	0.338631	0.421485	0.646772	3.331	0.387709	0.576563	0.715966	3.355	0.371946	0.576516	0.731332
ILL.lspA-BSU15450.35~499	1.637	0.300161	0.383486	0.657001	1.695	0.375143	0.452633	0.634574	2.404	0.443553	0.619257	0.692975	2.85	0.433581	0.62388	0.705296
ILL.nadR-BSU27890.1~543	1.761	0.246513	0.371768	0.719631	1.672	0.320193	0.401708	0.650289	2.218	0.342405	0.478593	0.691569	2.075	0.350366	0.513047	0.713108
ILL.yueG-BSU31790.60~281	1.697	0.234407	0.375773	0.743504	1.526	0.214366	0.344986	0.742941	1.734	0.290805	0.438381	0.723568	1.529	0.268837	0.399123	0.720877
ILL.rpsF-BSU40910.11~298	1.694	0.310946	0.357571	0.607596	1.623	0.327869	0.386882	0.623591	2.063	0.404905	0.449513	0.592594	1.826	0.332131	0.373113	0.594041
ILL.sipS-BSU23310.1~555	1.567	0.26957	0.356649	0.670459	1.719	0.33006	0.427833	0.663154	2.218	0.414419	0.551301	0.675568	2.073	0.333192	0.471931	0.698112
ILL.yvcN-BSU34730.1~765	2.019	0.283893	0.377068	0.666716	1.912	0.365102	0.456493	0.647029	2.531	0.403935	0.508572	0.646694	2.197	0.388475	0.500177	0.659402
ILL.nrnA-BSU29250.1~942	1.959	0.236845	0.371358	0.733757	1.597	0.272386	0.373793	0.686846	2.101	0.310697	0.452287	0.705861	1.845	0.2604	0.390265	0.719123
ILL.yycB-BSU40480.1~1209	1.974	0.2672	0.379582	0.694609	1.897	0.31059	0.408328	0.665983	1.746	0.294805	0.389979	0.671098	2.379	0.303041	0.446468	0.709185
ILL.folE-BSU22780.188~760	1.727	0.294336	0.365886	0.641089	1.523	0.307693	0.367408	0.627428	1.865	0.337365	0.413776	0.640538	1.95	0.323824	0.386374	0.627703
ILL.ysnB-BSU28350.1~510	2.025	0.286746	0.392816	0.673318	1.625	0.303556	0.37133	0.630041	2.065	0.321595	0.409549	0.648309	1.689	0.265901	0.383517	0.697874
ILL.yvaG-BSU33590.55~849	2.286	0.214925	0.386592	0.778086	1.672	0.243343	0.338089	0.689532	1.317	0.226567	0.2939	0.663143	2.017	0.222978	0.378139	0.760885
ILL.bipA-BSU14770.17~1855	1.951	0.311863	0.364522	0.617401	1.982	0.374856	0.434297	0.613175	2.662	0.485142	0.550496	0.60584	2.82	0.485416	0.575609	0.621493
ILL.ribC-BSU16670.19~969	2.022	0.300488	0.374851	0.642527	2.191	0.378181	0.475425	0.649453	2.397	0.45046	0.586441	0.665087	4.668	0.453501	0.666121	0.707249
ILL.tagF-BSU35720.1~2241	1.618	0.255153	0.362793	0.701305	1.798	0.314847	0.386284	0.639737	2.241	0.340441	0.465985	0.683305	2.133	0.303943	0.411547	0.677709
ILL.yjbH-BSU11550.1~900	2.51	0.244528	0.373635	0.718784	2.177	0.338574	0.443901	0.666289	2.665	0.359949	0.539723	0.713924	2.876	0.343623	0.482077	0.689932
ILL.ydgJ-BSU05670.1~495	1.712	0.242835	0.367605	0.722616	1.186	0.248141	0.327878	0.671361	2.21	0.288831	0.461096	0.739556	1.727	0.25969	0.440464	0.766342
ILL.pgcM-BSU34550.1~681	2.143	0.198899	0.376181	0.796339	1.607	0.232129	0.337155	0.705321	2.791	0.203672	0.412102	0.815372	2.068	0.235479	0.454864	0.806365
ILL.prkC-BSU15770.1~1947	2.242	0.279778	0.371026	0.670067	1.968	0.323086	0.408483	0.651804	2.474	0.367074	0.482048	0.666445	2.666	0.364155	0.507428	0.687283
ILL.yneS-BSU18070.20~601	1.996	0.207862	0.367378	0.778183	1.444	0.249797	0.336985	0.679007	1.871	0.264123	0.405925	0.72828	1.918	0.250943	0.406832	0.752138
ILL.murC-BSU29790.119~1417	1.937	0.294207	0.368666	0.647496	1.786	0.359025	0.436393	0.637484	2.688	0.409944	0.491668	0.625948	2.96	0.416287	0.478786	0.608396
ILL.eno-BSU33900.30~1322	2.274	0.332138	0.385131	0.605568	2.058	0.386958	0.47747	0.640113	2.092	0.428766	0.459607	0.578804	2.44	0.395014	0.451551	0.603659
ILL.nfrA-BSU38110.7~756	1.88	0.252676	0.367235	0.708214	1.604	0.299239	0.368472	0.642252	2.234	0.337168	0.483347	0.701682	2.558	0.333586	0.530808	0.738775
ILL.ybzI-BSU02019.1~264	2.078	0.210084	0.385267	0.787282	1.693	0.208743	0.37742	0.788891	1.423	0.185518	0.30968	0.755825	1.993	0.208728	0.369589	0.774766
ILL.yfhB-BSU08470.18~899	1.742	0.228044	0.372894	0.751996	1.982	0.274909	0.41247	0.718038	2.173	0.259002	0.433201	0.756981	2.421	0.26184	0.463047	0.779126
ILL.yqzH-BSU23720.11~217	1.696	0.235818	0.381609	0.749089	1.104	0.211582	0.297542	0.697354	1.495	0.234682	0.340943	0.695049	1.081	0.200282	0.245116	0.632916
ILL.mutL-BSU17050.1~1884	1.896	0.233409	0.369446	0.74026	1.589	0.291697	0.384578	0.670673	2.169	0.254256	0.387105	0.723855	2.157	0.247002	0.402609	0.751042
ILL.yrvM-BSU27540.83~847	1.494	0.28685	0.362692	0.650632	2.059	0.350015	0.410041	0.612732	2.458	0.491336	0.602205	0.638436	2.649	0.435311	0.525681	0.629282
ILL.rplB-BSU01190.32~865	1.805	0.336008	0.368737	0.588823	1.69	0.348487	0.413795	0.621132	1.919	0.423157	0.435668	0.563959	1.528	0.381911	0.395636	0.565659
ILL.yqzF-BSU24110.17~253	2.095	0.207829	0.38843	0.794553	1.729	0.27765	0.404283	0.709311	1.157	0.205607	0.291771	0.697481	1.501	0.247444	0.386699	0.740429
ILL.ysdC-BSU28820.1~1086	1.936	0.281775	0.376023	0.670811	1.687	0.334287	0.414469	0.643865	2.536	0.372575	0.471242	0.647289	1.941	0.36488	0.470967	0.661224
ILL.ywnG-BSU36570.1~519	1.876	0.250873	0.360581	0.700907	1.297	0.277819	0.337494	0.637837	1.92	0.281641	0.387743	0.680465	1.507	0.238034	0.334327	0.691173
ILL.yneK-BSU17960.57~485	1.5	0.253236	0.371537	0.713565	1.311	0.274811	0.350076	0.656762	1.535	0.25788	0.367215	0.701006	1.742	0.304871	0.393929	0.660908
ILL.ydbA-BSU04390.16~834	1.899	0.243401	0.379223	0.73313	1.394	0.268294	0.341406	0.655437	2.576	0.279594	0.454207	0.741422	3.342	0.288333	0.536496	0.791146
ILL.ddl-BSU04560.1~1065	1.869	0.298011	0.373991	0.64421	1.778	0.328361	0.39108	0.624627	1.496	0.3332	0.37681	0.604745	2.077	0.336938	0.412444	0.633518
ILL.rplV-BSU01210.1~342	1.399	0.338146	0.355699	0.572287	1.905	0.351281	0.419731	0.619797	2.041	0.477702	0.492698	0.564495	1.579	0.445427	0.427812	0.534797
ILL.hpr-BSU09990.22~633	1.568	0.245406	0.364128	0.717027	2.098	0.29705	0.436392	0.712776	2.734	0.358105	0.576579	0.746979	3.105	0.338402	0.558839	0.756558
ILL.yfkO-BSU07830.140~805	1.766	0.295668	0.366517	0.64348	1.805	0.384378	0.432805	0.604018	2.007	0.434227	0.532869	0.642013	2.005	0.391395	0.484613	0.642016
ILL.glnK-BSU36520.1~351	1.648	0.263254	0.378684	0.705026	1.906	0.347265	0.442704	0.656755	2.489	0.447083	0.649679	0.705135	2.331	0.334448	0.501691	0.715275
ILL.yvfW-BSU34040.27~1466	1.593	0.280025	0.360989	0.660806	1.242	0.264288	0.318982	0.634522	1.23	0.257476	0.295163	0.609229	1.467	0.262126	0.295483	0.602791
ILL.maf-BSU28050.19~588	1.726	0.255566	0.366345	0.705809	2.092	0.24944	0.398065	0.736889	2.13	0.334223	0.460268	0.685856	2.891	0.366016	0.545454	0.71782
ILL.ytkA-BSU30660.13~450	1.718	0.286009	0.368966	0.659158	1.454	0.309962	0.351169	0.605408	2.976	0.37222	0.536697	0.69804	2.865	0.307491	0.487838	0.735769
ILL.med-BSU11300.33~986	2.009	0.271979	0.376062	0.685724	1.714	0.292861	0.371926	0.650686	2.569	0.330735	0.502017	0.724733	2.783	0.344698	0.528606	0.725525
ILL.ycsE-BSU04040.1~750	2.221	0.276657	0.372146	0.670162	1.548	0.303532	0.36977	0.63525	2.294	0.37113	0.497787	0.675103	2.245	0.330235	0.436436	0.666327
ILL.yttA-BSU30360.9~755	1.674	0.208934	0.37524	0.784324	1.274	0.230755	0.31162	0.677685	1.746	0.1826	0.355452	0.809621	1.708	0.203052	0.360718	0.782955
ILL.srfAC-BSU03510.9~3836	2.699	0.28562	0.365049	0.653801	1.709	0.305267	0.360879	0.624257	1.922	0.283915	0.336132	0.620196	2.124	0.323839	0.408383	0.649509
ILL.mrgA-BSU32990.9~470	1.393	0.297008	0.36955	0.647688	1.059	0.322669	0.347126	0.586499	1.165	0.280082	0.307396	0.593551	1.164	0.310257	0.349071	0.607123
ILL.yvyD-BSU35310.1~570	1.665	0.279257	0.363598	0.665379	1.93	0.348109	0.429503	0.642304	2.062	0.354578	0.451025	0.653355	1.458	0.298911	0.384392	0.660921
ILL.tgt-BSU27710.1~1146	1.913	0.308014	0.370703	0.626729	1.719	0.368693	0.423085	0.611547	2.415	0.417684	0.527533	0.648965	2.368	0.396485	0.510149	0.653101
ILL.yxeH-BSU39550.9~821	1.602	0.25911	0.352733	0.675331	1.398	0.285027	0.350306	0.643453	2.115	0.330275	0.444559	0.673852	2.636	0.309527	0.441168	0.696076
ILL.dxr-BSU16550.1~1152	1.523	0.303018	0.36036	0.62674	1.79	0.336778	0.39233	0.615628	2.199	0.398215	0.486975	0.633403	2.067	0.387449	0.466697	0.629974
ILL.yqeH-BSU25670.1~1101	1.957	0.284105	0.363612	0.655194	1.822	0.350601	0.419448	0.627439	2.273	0.399111	0.510305	0.654678	2.341	0.35768	0.486699	0.678082
ILL.atpG-BSU36820.77~940	1.976	0.317173	0.383737	0.626577	2.561	0.419447	0.510648	0.634527	2.89	0.542605	0.622703	0.60897	2.033	0.471307	0.53294	0.606122
ILL.atpF-BSU36850.106~618	1.634	0.336536	0.373665	0.596373	1.737	0.329705	0.407283	0.640586	2.467	0.48195	0.52061	0.583354	1.846	0.437696	0.430123	0.541281
ILL.yrhH-BSU27180.25~567	1.606	0.207969	0.366461	0.780815	1.045	0.17066	0.248934	0.710492	1.524	0.234892	0.379666	0.748872	2.328	0.224826	0.405791	0.781878
ILL.yqeL-BSU25620.1~357	1.738	0.294245	0.372027	0.649177	1.56	0.301969	0.377474	0.643217	2.068	0.438147	0.49739	0.607748	1.909	0.397319	0.480923	0.632734
ILL.galT-BSU38190.1~1542	1.858	0.279022	0.372114	0.672218	1.721	0.332386	0.417003	0.650361	2.226	0.338715	0.458645	0.678681	3.141	0.363716	0.570401	0.736291
ILL.cotD-BSU22200.11~238	1.575	0.249256	0.358156	0.698379	1.32	0.238411	0.305101	0.648996	1.37	0.185186	0.234713	0.639528	1.541	0.254946	0.31466	0.638007
ILL.cheA-BSU16430.1~2019	1.731	0.272638	0.361893	0.6721	2.278	0.394674	0.469997	0.628142	3.117	0.447291	0.643974	0.70489	3.421	0.439859	0.690369	0.737233
ILL.licT-BSU39080.1~834	1.798	0.236301	0.376607	0.740692	1.339	0.264052	0.329238	0.646332	1.76	0.263085	0.430235	0.754057	2.093	0.250356	0.422622	0.762251
ILL.yvbH-BSU33860.259~873	1.731	0.22057	0.365735	0.758763	1.664	0.282043	0.395298	0.69581	2.209	0.293609	0.479355	0.753379	2.798	0.324788	0.596474	0.793509
ILL.hemL-BSU28120.1~1293	1.758	0.268215	0.362252	0.678219	1.485	0.324435	0.379472	0.622108	1.77	0.284008	0.368612	0.661543	1.899	0.313922	0.429751	0.682517
ILL.yhxA-BSU09260.72~1424	1.918	0.262562	0.367087	0.689819	1.832	0.319054	0.403963	0.652502	2.79	0.34742	0.474759	0.682346	2.646	0.378554	0.534634	0.69572
ILL.yfmJ-BSU07450.204~1223	1.718	0.227689	0.36744	0.746612	2.028	0.296028	0.425785	0.705573	2.401	0.330678	0.517915	0.736832	2.296	0.284648	0.499369	0.77725
ILL.manA-BSU12020.1~948	1.446	0.296298	0.365547	0.64376	1.218	0.232315	0.261113	0.597528	1.186	0.278146	0.29682	0.579845	2.163	0.452296	0.536768	0.625614
ILL.ylbF-BSU14990.9~458	1.645	0.267546	0.367086	0.686045	1.649	0.330037	0.398233	0.634332	2.394	0.407339	0.529196	0.660708	2.154	0.327321	0.420232	0.653314
ILL.sspA-BSU29570.2~211	1.326	0.254927	0.360018	0.700957	1.354	0.284577	0.34333	0.633401	1.665	0.333041	0.451875	0.684859	1.227	0.242935	0.328888	0.678553
ILL.ygaO-BSU08890.1~474	1.828	0.196708	0.370294	0.797595	1.176	0.217894	0.308072	0.699745	0.999	0.192819	0.246356	0.656519	1.395	0.18694	0.310943	0.757744
ILL.ygaD-BSU08690.61~1830	1.905	0.260978	0.37088	0.698885	2.183	0.339801	0.449166	0.670065	3.053	0.404408	0.59324	0.710838	3.088	0.398527	0.624116	0.736611
ILL.rpsB-BSU16490.60~800	1.957	0.343475	0.377879	0.585785	2.111	0.364954	0.450715	0.637184	2.318	0.447909	0.488221	0.584492	1.644	0.370078	0.402373	0.585422
ILL.glpQ-BSU02130.99~980	1.898	0.334643	0.367305	0.587811	2.504	0.501721	0.579838	0.613483	3.266	0.587763	0.648622	0.591437	4.5	0.695137	0.916112	0.667854
ILL.yqfF-BSU25330.79~2214	1.708	0.25791	0.364864	0.697665	1.844	0.331035	0.408541	0.644391	3.081	0.404751	0.597271	0.714637	2.881	0.403057	0.619684	0.730881
ILL.recQ-BSU23020.1~1491	2.488	0.255094	0.381263	0.715419	2.25	0.311596	0.405952	0.663272	2.685	0.343394	0.560909	0.751878	3.381	0.3026	0.549997	0.784033
ILL.ysxB-BSU27950.1~339	1.96	0.287664	0.393584	0.670794	2.185	0.279543	0.360516	0.626247	1.858	0.389214	0.431961	0.593149	1.744	0.359879	0.400722	0.584599
ILL.yheA-BSU09800.18~371	1.567	0.311932	0.363138	0.612524	2.453	0.336131	0.423887	0.643698	2.104	0.411461	0.522573	0.651071	1.751	0.444162	0.497643	0.602591
ILL.csbB-BSU08600.65~1054	1.995	0.257537	0.373974	0.703975	1.418	0.261682	0.317592	0.634915	1.248	0.228634	0.297044	0.665845	1.38	0.245872	0.328285	0.675491
ILL.tilS-BSU00670.1~1419	1.742	0.279372	0.362763	0.661066	2.495	0.376223	0.481413	0.655794	3.848	0.493499	0.699859	0.69469	4.012	0.517709	0.776862	0.721419
ILL.spoVS-BSU16980.44~304	1.281	0.291178	0.354325	0.637928	1.717	0.349919	0.446299	0.652164	2.115	0.443474	0.541257	0.63683	1.766	0.375748	0.43144	0.604049
ILL.hom-BSU32260.1~1302	2.109	0.289722	0.378773	0.663465	2.175	0.405049	0.494185	0.636874	4.42	0.495802	0.723149	0.704916	3.428	0.411322	0.580066	0.691053
ILL.ylpC-BSU15880.1~567	1.575	0.314629	0.360678	0.609992	1.485	0.283108	0.350572	0.643109	1.646	0.334098	0.373666	0.599687	1.529	0.331979	0.363885	0.589823
ILL.yugJ-BSU31370.544~1707	1.911	0.277598	0.372144	0.673058	2.578	0.369802	0.483941	0.664807	2.644	0.408895	0.573058	0.693755	3.308	0.417646	0.604765	0.706434
ILL.ylzA-BSU15670.28~297	1.82	0.277486	0.36233	0.655186	1.567	0.354629	0.399806	0.605394	1.911	0.329986	0.357524	0.573327	2.076	0.457793	0.515959	0.6007
ILL.endB-BSU04650.23~304	1.843	0.326464	0.354411	0.576317	1.556	0.37255	0.403101	0.579687	2.682	0.486736	0.510498	0.559068	1.757	0.457143	0.468895	0.559017
ILL.yfhC-BSU08480.7~591	1.613	0.314752	0.369185	0.618191	1.898	0.328059	0.432837	0.66324	2.164	0.445207	0.497793	0.596822	2.236	0.3983	0.459323	0.608495
ILL.iseA-BSU18380.25~570	1.785	0.242716	0.372967	0.728583	1.569	0.278148	0.343615	0.641256	1.417	0.263536	0.332787	0.653148	1.611	0.26583	0.379169	0.702962
ILL.yhcX-BSU09250.1~1542	1.943	0.281899	0.362624	0.657731	2.058	0.362273	0.453105	0.647308	2.937	0.404297	0.593467	0.710093	4.267	0.424414	0.684143	0.743791
ILL.lytA-BSU35640.20~328	1.847	0.354993	0.386487	0.5842	2.352	0.500966	0.635298	0.655945	5.916	0.851658	1.29882	0.725142	2.622	0.600356	0.70816	0.622763
ILL.yheN-BSU09660.72~920	1.664	0.230006	0.364596	0.742148	2.115	0.285571	0.442089	0.732247	2.781	0.381826	0.566674	0.716761	3.255	0.389713	0.633325	0.750548
ILL.murF-BSU04570.72~1445	1.919	0.263077	0.364777	0.687966	1.541	0.303146	0.354516	0.618242	1.787	0.317067	0.393147	0.643625	2.085	0.31743	0.437612	0.686795
ILL.fxsA-BSU29170.10~393	1.482	0.269418	0.358561	0.672178	1.993	0.316431	0.434372	0.679578	2.779	0.492477	0.682669	0.689474	2.485	0.445673	0.559656	0.647905
ILL.dxs-BSU24270.1~1902	1.798	0.294452	0.370173	0.647053	1.76	0.351736	0.406003	0.612174	2.1	0.392657	0.483551	0.642933	2.307	0.382908	0.486239	0.651918
ILL.ylmD-BSU15370.7~843	1.588	0.289839	0.369856	0.658265	1.973	0.367859	0.423157	0.609915	2.554	0.403523	0.481938	0.623791	2.188	0.372089	0.456642	0.637784
ILL.sdaAA-BSU15860.26~928	1.578	0.302804	0.371362	0.641865	1.784	0.366515	0.422251	0.61617	2.696	0.420775	0.534954	0.65342	2.363	0.443798	0.581437	0.667276
ILL.folB-BSU00780.1~363	1.413	0.269269	0.364881	0.681051	1.785	0.303719	0.448017	0.709017	1.874	0.329743	0.465091	0.695547	1.889	0.310456	0.46885	0.724488
ILL.acpP-BSU15920.1~234	1.691	0.36198	0.392849	0.583476	1.968	0.382131	0.415806	0.584401	1.529	0.409707	0.433037	0.576579	1.566	0.407242	0.400615	0.537063
ILL.dhbA-BSU32000.19~804	1.913	0.29707	0.3781	0.647242	2.282	0.413779	0.520552	0.649812	3.314	0.503099	0.769137	0.7286	4.966	0.588802	0.967968	0.754553
ILL.tatAC-BSU17710.23~211	1.459	0.257214	0.373547	0.710951	1.313	0.301439	0.35521	0.625347	1.622	0.353296	0.496146	0.696164	1.302	0.215102	0.345375	0.747893
ILL.minC-BSU28000.2~682	1.867	0.30765	0.372733	0.629867	1.848	0.364391	0.419457	0.614103	2.444	0.480047	0.591858	0.639426	1.971	0.434055	0.49239	0.608678
ILL.ctpA-BSU19590.12~1412	1.668	0.292728	0.365703	0.645477	2.085	0.371038	0.458565	0.64432	3.132	0.460524	0.597991	0.660375	2.566	0.456706	0.632389	0.691844
ILL.groEL-BSU06030.1~1635	1.982	0.316728	0.361168	0.605582	1.924	0.28896	0.348662	0.628013	1.584	0.314659	0.340964	0.584027	1.597	0.340535	0.370917	0.585467
ILL.yrvD-BSU27630.1~324	1.417	0.222328	0.362041	0.754123	1.153	0.258874	0.328769	0.656575	1.417	0.241279	0.337522	0.691827	1.28	0.216552	0.332055	0.732384
ILL.recX-BSU08520.158~952	1.665	0.265796	0.37832	0.700781	1.742	0.292283	0.393661	0.680327	2.19	0.300713	0.468604	0.734335	2.38	0.315374	0.469673	0.717715
ILL.glcK-BSU24850.11~976	1.583	0.258936	0.374198	0.706177	1.604	0.301127	0.376333	0.647218	1.915	0.290951	0.4159	0.699564	2.934	0.345581	0.544449	0.739021
ILL.ywbC-BSU38370.19~399	1.431	0.297861	0.359819	0.631984	1.694	0.328885	0.400408	0.634052	1.728	0.341407	0.398272	0.612546	1.725	0.322789	0.389179	0.628579
ILL.yclQ-BSU03830.1~954	1.608	0.285896	0.354037	0.642821	1.837	0.308081	0.379486	0.636141	1.847	0.327574	0.393401	0.623517	2.914	0.397163	0.518301	0.657677
ILL.yhcA-BSU09010.8~1606	2.042	0.214142	0.378759	0.777203	1.535	0.234577	0.319445	0.679918	1.984	0.215917	0.336432	0.732538	1.921	0.231332	0.407429	0.778733
ILL.aroH-BSU22690.1~384	1.425	0.274674	0.356265	0.663405	1.372	0.299752	0.357378	0.630283	1.779	0.296817	0.380933	0.653541	2.562	0.352239	0.47358	0.665508
ILL.yutI-BSU32220.1~336	1.371	0.317955	0.359728	0.604034	1.602	0.345348	0.416487	0.631258	1.81	0.411419	0.476439	0.616945	1.869	0.418884	0.470761	0.602989
ILL.walH-BSU40390.1~1368	1.952	0.250802	0.366083	0.706093	1.929	0.303897	0.404441	0.674404	2.66	0.359666	0.535798	0.716487	2.294	0.327658	0.485848	0.718205
ILL.sat-BSU15590.49~1197	1.862	0.231122	0.369279	0.743631	1.088	0.209918	0.271269	0.663098	2.783	0.320577	0.487016	0.721218	1.53	0.229512	0.350002	0.729207
ILL.yjcN-BSU11920.16~336	1.372	0.345527	0.360506	0.571616	2.25	0.440286	0.475545	0.580146	2.835	0.655676	0.755037	0.614047	2.938	0.49917	0.548049	0.580545
ILL.rplM-BSU01490.49~486	1.535	0.348575	0.366403	0.573726	2.145	0.348687	0.410287	0.603756	2.12	0.457022	0.459852	0.549575	1.933	0.406627	0.408008	0.550426
ILL.nudF-BSU23610.26~583	1.723	0.227438	0.373682	0.752509	1.346	0.311668	0.382795	0.642663	2.366	0.301852	0.488037	0.748423	2.776	0.327866	0.530078	0.746889
ILL.ymzA-BSU17360.1~231	1.436	0.249427	0.357123	0.701829	1.25	0.253802	0.332922	0.667341	1.639	0.268443	0.404666	0.72395	1.391	0.230931	0.329126	0.700008
ILL.rpsL-BSU01100.114~530	1.643	0.350173	0.364973	0.567563	2.098	0.368958	0.393786	0.564122	1.846	0.467877	0.421987	0.504889	1.778	0.461085	0.418213	0.506889
ILL.pssA-BSU02270.3~536	1.532	0.259823	0.35393	0.682597	1.3	0.302342	0.355556	0.623	3.03	0.464758	0.687128	0.713581	2.272	0.352662	0.536149	0.726567
ILL.yvmC-BSU35070.157~903	1.753	0.201731	0.373096	0.791249	1.437	0.235698	0.325654	0.686813	1.784	0.218653	0.374218	0.765902	1.282	0.171281	0.251311	0.708723
ILL.fliD-BSU35340.1~1497	1.6	0.313614	0.359903	0.608469	2.473	0.445595	0.526179	0.625472	5.163	0.767146	1.15542	0.720785	4.101	0.549309	0.786297	0.699544
ILL.ffh-BSU15980.14~1354	1.802	0.295582	0.366133	0.641955	1.828	0.305281	0.369379	0.62994	2.212	0.366983	0.431773	0.619295	2.245	0.38232	0.464997	0.632331
ILL.aroE-BSU25660.1~843	2.057	0.286494	0.370771	0.660364	1.582	0.336246	0.40688	0.636016	2.256	0.398875	0.485826	0.633044	1.9	0.384576	0.454069	0.620554
ILL.ylaN-BSU14840.1~282	1.211	0.29616	0.340833	0.609955	1.586	0.357193	0.428572	0.631552	1.692	0.428664	0.445739	0.568146	1.503	0.363412	0.397684	0.59192
ILL.yvrO-BSU33270.1~690	1.881	0.264574	0.374816	0.695638	1.967	0.396232	0.495542	0.648552	4.112	0.436532	0.74621	0.763525	3.541	0.396644	0.682495	0.764889
ILL.yceD-BSU02900.1~582	1.882	0.325801	0.385644	0.614994	1.816	0.411338	0.470562	0.611579	2.244	0.503289	0.555833	0.594661	2.397	0.459402	0.545533	0.624376
ILL.ctaA-BSU14870.28~948	1.628	0.2055	0.364095	0.78119	1.79	0.266134	0.359155	0.676095	1.582	0.247911	0.375545	0.72536	2.046	0.2633	0.435984	0.757567
ILL.yxiF-BSU39210.137~607	1.911	0.263193	0.365479	0.688781	1.475	0.331707	0.389878	0.624313	1.746	0.291955	0.383059	0.665684	1.69	0.273259	0.369866	0.676416
ILL.rpsC-BSU01220.1~657	1.527	0.347209	0.36002	0.567081	1.768	0.346994	0.381824	0.5868	1.933	0.490403	0.515687	0.575144	1.565	0.420772	0.395861	0.526148
ILL.yjcS-BSU11970.1~318	1.945	0.202162	0.369504	0.790103	1.263	0.225653	0.316674	0.695679	2.237	0.33679	0.540671	0.745258	1.343	0.234575	0.366721	0.739366
ILL.yvcI-BSU34780.312~788	1.492	0.260277	0.365066	0.697297	2.418	0.333366	0.452115	0.680829	1.791	0.325327	0.464093	0.702321	2.12	0.336958	0.480371	0.700938
ILL.sacP-BSU38050.2~1387	2.113	0.230571	0.372031	0.744516	1.826	0.321337	0.43093	0.674715	2.864	0.356976	0.622207	0.774752	2.648	0.298268	0.528488	0.780287
ILL.phoE-BSU10340.8~589	1.529	0.2935	0.364012	0.644832	1.839	0.386942	0.454063	0.621865	1.917	0.36871	0.460997	0.645737	2.164	0.382165	0.513714	0.678236
ILL.besA-BSU32010.58~927	1.86	0.258202	0.36709	0.697764	2.479	0.365996	0.51671	0.697008	3.626	0.478031	0.765246	0.745571	3.196	0.396198	0.635751	0.745071
ILL.ylxR-BSU16610.1~276	2.11	0.292937	0.380947	0.644407	1.521	0.304331	0.38391	0.649583	1.624	0.367507	0.423565	0.611195	1.527	0.351542	0.417796	0.627706
ILL.cheD-BSU16460.1~501	1.816	0.284796	0.362974	0.653273	2.018	0.436629	0.496979	0.609315	3.923	0.571108	0.804408	0.693515	4.134	0.557479	0.854985	0.727614
ILL.thrC-BSU32250.1~1059	1.7	0.259967	0.370063	0.700954	1.787	0.324521	0.420436	0.661989	2.35	0.360069	0.516124	0.697684	2.597	0.351038	0.52732	0.718396
ILL.yvjA-BSU35280.33~878	1.883	0.279809	0.376338	0.675579	1.93	0.343434	0.448355	0.664293	3.47	0.397935	0.674091	0.76368	2.072	0.291468	0.475144	0.754351
ILL.yfiY-BSU08440.20~997	1.717	0.327963	0.361165	0.594155	1.996	0.344046	0.425245	0.638454	2.421	0.483987	0.558528	0.614185	2.672	0.527052	0.639054	0.634619
ILL.ylxW-BSU15250.1~696	1.663	0.271603	0.367893	0.68242	1.974	0.329122	0.435264	0.668402	2.506	0.43598	0.597403	0.685385	2.722	0.389241	0.576204	0.715581
ILL.hepT-BSU22740.1~1047	1.508	0.303788	0.364437	0.630661	2.042	0.336881	0.403364	0.623408	2.378	0.418637	0.525471	0.645435	2.151	0.405352	0.522717	0.658496
ILL.comA-BSU31680.1~645	1.618	0.308383	0.374559	0.635801	1.742	0.347967	0.417065	0.628565	2.092	0.392158	0.501216	0.656288	1.84	0.319292	0.405792	0.652914
ILL.ispH-BSU25160.75~1019	1.606	0.290182	0.367369	0.650543	2.216	0.386737	0.467614	0.634401	2.711	0.398545	0.547126	0.685341	2.296	0.37493	0.500489	0.672874
ILL.yeaC-BSU06330.25~987	1.582	0.228802	0.366414	0.746207	2.024	0.304571	0.437778	0.703559	3.227	0.289708	0.497546	0.764035	2.773	0.317156	0.57325	0.787055
ILL.yrzL-BSU27400.36~302	1.562	0.285759	0.365668	0.656267	1.673	0.323397	0.389796	0.628694	2.716	0.431496	0.614332	0.696349	1.929	0.375156	0.507133	0.681148
ILL.rpoA-BSU01430.131~1075	1.893	0.316623	0.367989	0.605406	1.793	0.355225	0.403659	0.599675	2.124	0.470607	0.486731	0.560581	1.814	0.387852	0.39296	0.554508
ILL.ykuP-BSU14170.16~471	1.604	0.340463	0.359394	0.572843	2.793	0.524413	0.620581	0.619726	5.917	0.982768	1.4417	0.713733	4.873	0.804703	1.10429	0.681174
ILL.ycnK-BSU03960.14~586	1.7	0.259761	0.370185	0.700934	1.376	0.275957	0.346598	0.649894	1.791	0.3144	0.425324	0.677828	1.793	0.310079	0.448991	0.707546
ILL.ykpA-BSU14430.23~1645	1.757	0.306515	0.367453	0.628139	1.781	0.352689	0.41257	0.61713	2.414	0.379696	0.455276	0.62572	2.738	0.393605	0.470686	0.624775
ILL.rimM-BSU16020.5~529	1.748	0.272288	0.358209	0.663839	1.326	0.236406	0.310583	0.66748	1.422	0.303472	0.348616	0.610873	1.693	0.279369	0.35106	0.648156
ILL.ylaI-BSU14790.6~215	1.831	0.261543	0.386458	0.704248	1.9	0.306205	0.351783	0.597361	1.682	0.328331	0.395553	0.628243	2.122	0.291236	0.379976	0.640534
ILL.yerA-BSU06560.14~1756	1.838	0.284716	0.360977	0.650332	1.795	0.344974	0.390572	0.606569	3.892	0.469544	0.730825	0.731176	3.109	0.411584	0.613252	0.717298
ILL.yhcG-BSU09070.1~699	1.989	0.252954	0.3717	0.71012	1.792	0.32242	0.423766	0.667526	3.621	0.410844	0.676166	0.750658	2.708	0.375218	0.605031	0.749212
ILL.yhaX-BSU09830.345~1211	2.019	0.250575	0.383066	0.719729	1.914	0.287513	0.40622	0.697204	4.221	0.2888	0.553082	0.787295	3.014	0.268012	0.519247	0.797206
ILL.yqhY-BSU24330.13~420	1.537	0.290273	0.368139	0.646984	1.63	0.362057	0.45393	0.651892	1.97	0.38918	0.482739	0.643982	1.792	0.386253	0.458327	0.625846
ILL.fbp-BSU40190.1~2016	1.816	0.251884	0.36676	0.709776	1.597	0.290571	0.378184	0.66586	2.702	0.338443	0.484104	0.699697	2.706	0.309109	0.474264	0.726231
ILL.tdk-BSU37060.89~676	1.802	0.279711	0.371419	0.674212	1.514	0.292812	0.369429	0.648671	2.211	0.345182	0.44446	0.657255	1.961	0.293289	0.383502	0.663641
ILL.yuaE-BSU31030.4~492	1.76	0.24675	0.359096	0.704445	1.863	0.341984	0.448522	0.670043	2.028	0.350183	0.44798	0.65559	2.506	0.431639	0.599626	0.689069
ILL.gapB-BSU29020.25~1047	1.859	0.230962	0.383667	0.756459	1.754	0.276774	0.381507	0.686845	2.909	0.314873	0.561638	0.781591	3.137	0.249303	0.534721	0.833572
ILL.yitU-BSU11140.29~841	1.787	0.279359	0.373793	0.674773	1.794	0.319628	0.425324	0.673306	2.582	0.400805	0.591684	0.714304	2.886	0.369526	0.600848	0.750627
ILL.phoR-BSU29100.1~1740	1.723	0.263328	0.363814	0.688536	2.1	0.328632	0.425822	0.660929	2.215	0.369227	0.518561	0.695837	2.538	0.342091	0.543033	0.740757
ILL.yloQ-BSU15780.7~903	1.664	0.289869	0.36524	0.648546	1.914	0.358031	0.435792	0.63342	2.604	0.384128	0.507221	0.665339	1.877	0.365281	0.450911	0.640344
ILL.yitV-BSU11150.7~774	1.812	0.299671	0.360757	0.625186	2.286	0.484361	0.563196	0.617578	3.739	0.599149	0.798071	0.674741	4.037	0.585394	0.877773	0.719234
ILL.ylqH-BSU16080.1~282	1.833	0.215925	0.383832	0.780748	2.421	0.286363	0.477004	0.747457	2.865	0.305823	0.664239	0.842269	2.508	0.255473	0.528218	0.828206
ILL.yqjQ-BSU23780.6~785	2.049	0.224963	0.376926	0.760165	2.046	0.276869	0.414822	0.706989	2.568	0.310064	0.512949	0.751656	2.318	0.270139	0.471073	0.773491
ILL.hbs-BSU22790.210~488	1.686	0.33403	0.368004	0.5913	1.651	0.333143	0.396042	0.622911	2.617	0.455177	0.455322	0.539518	2.307	0.382954	0.412123	0.566402
ILL.cccB-BSU35270.12~350	1.762	0.240875	0.356655	0.705246	1.382	0.224451	0.288416	0.655922	1.388	0.249321	0.312998	0.649105	1.37	0.269837	0.328891	0.638684
ILL.exoAA-BSU40880.18~776	1.812	0.253254	0.383233	0.7191	1.436	0.27496	0.334115	0.633951	1.803	0.277867	0.391797	0.695416	2.013	0.246116	0.353858	0.701055
ILL.yvgK-BSU33370.6~932	1.942	0.267695	0.373044	0.687598	1.415	0.30629	0.352057	0.612111	2.016	0.302904	0.40943	0.677257	2.09	0.335381	0.444969	0.673476
ILL.purE-BSU06420.141~629	1.794	0.263725	0.38663	0.707813	1.856	0.377566	0.480014	0.654759	1.91	0.327887	0.485302	0.715436	1.927	0.273793	0.431933	0.738564
ILL.ybaC-BSU01140.99~1055	2.24	0.199688	0.380023	0.800608	2.25	0.2378	0.405148	0.765265	2.738	0.283506	0.501745	0.777008	2.26	0.216769	0.428547	0.812207
ILL.yczE-BSU03580.20~667	2.192	0.216046	0.378285	0.774819	1.642	0.212526	0.342878	0.749326	2.251	0.215059	0.367313	0.766623	2.704	0.246893	0.469016	0.802788
ILL.eutD-BSU37660.68~1039	2.361	0.319758	0.36907	0.603797	1.804	0.346147	0.402796	0.612213	2.166	0.426652	0.466024	0.586812	1.998	0.41835	0.464502	0.593956
ILL.ypzE-BSU23060.18~182	1.934	0.199704	0.386205	0.794005	1.935	0.209662	0.365389	0.765379	2.479	0.319845	0.53936	0.759087	1.456	0.250986	0.354275	0.695645
ILL.yceC-BSU02890.75~674	1.459	0.334339	0.353995	0.575824	1.92	0.392363	0.45168	0.61172	1.993	0.423477	0.435161	0.561777	1.825	0.445	0.465645	0.569054
ILL.ykyA-BSU14570.21~692	1.641	0.296325	0.375847	0.654319	2.026	0.395018	0.503196	0.657421	4.181	0.420032	0.73798	0.77057	3.2	0.411702	0.608824	0.713393
ILL.ypbE-BSU23000.1~723	1.8	0.243103	0.372218	0.726795	1.737	0.310508	0.435282	0.695718	2.2	0.282441	0.441263	0.73451	2.297	0.279137	0.469745	0.760877
ILL.efeU-BSU38280.27~1472	1.914	0.235529	0.377906	0.743584	1.678	0.287311	0.373412	0.664867	2.345	0.302243	0.472348	0.735892	2.815	0.314776	0.518898	0.75522
ILL.asd-BSU16750.37~1077	1.762	0.30857	0.358818	0.612946	1.91	0.362096	0.436803	0.633297	1.867	0.385638	0.441495	0.611403	1.995	0.366091	0.440459	0.630944
ILL.jag-BSU41030.1~627	2.228	0.298154	0.379095	0.646231	2.008	0.334142	0.410408	0.633739	2.059	0.411181	0.475591	0.614198	2.508	0.413434	0.523149	0.642623
ILL.fmt-BSU15730.5~958	1.776	0.271841	0.368896	0.67682	1.538	0.335191	0.387339	0.615739	2.062	0.349498	0.443419	0.651015	1.849	0.329921	0.419704	0.654954
ILL.yoeD-BSU18400.69~299	1.373	0.289371	0.365437	0.652697	1.682	0.364762	0.440447	0.632299	3.99	0.627783	0.952366	0.7258	2.332	0.41972	0.522968	0.64583
ILL.dnaD-BSU22350.77~775	1.68	0.300951	0.367194	0.634943	1.922	0.403347	0.464178	0.611737	2.908	0.495552	0.664011	0.674965	2.75	0.375512	0.516594	0.685005
ILL.ywgA-BSU37590.36~536	1.751	0.259785	0.368816	0.698113	1.441	0.269715	0.316774	0.618278	1.925	0.289259	0.39442	0.681968	1.374	0.252626	0.30884	0.635604
ILL.yunE-BSU32380.1~822	2.252	0.209453	0.373104	0.780523	1.686	0.241387	0.362332	0.717669	2.321	0.260694	0.417359	0.740217	2.1	0.235471	0.429025	0.789546
ILL.cysP-BSU15580.1~1065	1.871	0.200782	0.381893	0.802368	1.7	0.201878	0.318435	0.73435	2.357	0.231437	0.481738	0.828653	2.033	0.216626	0.389585	0.780195
ILL.yjbJ-BSU11570.204~749	2.077	0.273074	0.381556	0.689617	2.699	0.367229	0.546129	0.717685	2.833	0.492744	0.719102	0.711212	2.991	0.4592	0.68578	0.719706
ILL.ywfI-BSU37670.36~785	2.351	0.289351	0.382902	0.665119	2.026	0.356433	0.440116	0.64228	2.557	0.367173	0.445594	0.630182	2.719	0.366985	0.547651	0.715824
ILL.rpmG-BSU00990.1~150	1.646	0.221784	0.384352	0.771398	1.613	0.343338	0.481673	0.69814	2.111	0.316662	0.479059	0.720688	1.235	0.280743	0.358579	0.658972
ILL.yhgD-BSU10150.38~613	1.616	0.226269	0.348314	0.727177	1.293	0.297157	0.36765	0.646326	2.475	0.330701	0.528557	0.743702	2.085	0.305053	0.463228	0.719471
ILL.gmuB-BSU05810.13~324	1.55	0.26602	0.366806	0.688098	0.996	0.212627	0.285952	0.68202	1.621	0.287784	0.381749	0.665088	1.168	0.229758	0.302918	0.672623
ILL.pcrA-BSU06610.1~2220	1.953	0.263581	0.375544	0.698844	1.544	0.301192	0.362887	0.632035	1.696	0.299786	0.396534	0.671442	2.086	0.297354	0.409427	0.687363
ILL.glyS-BSU25260.1~2040	1.953	0.261305	0.36096	0.685093	1.795	0.304417	0.375094	0.641367	2.306	0.351839	0.453621	0.658928	2.177	0.310302	0.413615	0.671361
ILL.ypmB-BSU22380.1~486	1.519	0.288512	0.358651	0.641229	1.661	0.326585	0.380394	0.614319	1.642	0.370988	0.419983	0.600336	1.83	0.372089	0.391839	0.566578
ILL.ywlE-BSU36930.1~453	1.607	0.230653	0.362306	0.734681	1.319	0.284993	0.349434	0.641969	2.027	0.330989	0.505617	0.727648	2.739	0.300226	0.51182	0.765557
ILL.murB-BSU15230.32~943	1.836	0.300842	0.363807	0.631306	1.645	0.29417	0.359875	0.636312	1.84	0.353273	0.415384	0.620207	2.169	0.371166	0.45554	0.63414
ILL.yhaH-BSU10000.395~751	2.103	0.289094	0.373727	0.657983	2.049	0.316875	0.414872	0.666749	2.147	0.355204	0.491712	0.688102	1.723	0.293552	0.390085	0.675398
ILL.ykzT-BSU14009.10~171	1.344	0.294637	0.353509	0.630604	0.994	0.207325	0.268219	0.659648	1.163	0.273438	0.323999	0.627283	0.904	0.200187	0.212915	0.570182
ILL.yozV-BSU18849.25~264	1.258	0.285157	0.370362	0.667867	1.35	0.284861	0.349562	0.639285	2.361	0.420741	0.565955	0.674499	2.245	0.324111	0.476445	0.705861
ILL.sunI-BSU21490.19~336	1.977	0.269444	0.396712	0.711003	1.436	0.318318	0.385528	0.635765	1.853	0.376881	0.490995	0.665624	1.171	0.269517	0.306331	0.60605
ILL.nusG-BSU01010.42~575	2.13	0.297175	0.374809	0.645095	2.014	0.363305	0.447371	0.639706	2.298	0.337571	0.44578	0.667713	2.064	0.397035	0.520014	0.667624
ILL.sspH-BSU08110.5~184	2.178	0.241129	0.411977	0.761777	1.68	0.314495	0.43359	0.687883	3.157	0.382515	0.748949	0.812717	2.559	0.31205	0.584256	0.795755
ILL.yhbI-BSU08990.20~484	2.092	0.231013	0.382568	0.749984	1.604	0.225493	0.346793	0.725906	1.526	0.22437	0.340776	0.723809	1.597	0.239229	0.377878	0.736921
ILL.yhbF-BSU08960.12~719	1.504	0.267772	0.369646	0.690117	1.56	0.306817	0.385108	0.651352	2.243	0.35015	0.519736	0.715909	2.135	0.341736	0.501937	0.714535
ILL.prfA-BSU37010.27~1097	2.06	0.323683	0.368488	0.604392	2.29	0.39444	0.473483	0.628591	2.143	0.450381	0.522344	0.613752	2.266	0.442943	0.500983	0.600314
ILL.yfiK-BSU08300.1~663	2.032	0.249701	0.391849	0.7351	2.176	0.33121	0.481737	0.709782	3.527	0.378477	0.637795	0.761349	3.619	0.353805	0.694817	0.809718
ILL.prfB-BSU35290.68~1169	2.27	0.29247	0.373198	0.646056	1.956	0.343234	0.441097	0.657883	2.275	0.404688	0.474352	0.619596	2.292	0.400017	0.472179	0.619834
ILL.purU-BSU13110.5~907	1.67	0.256481	0.364549	0.696126	1.546	0.274986	0.375303	0.684441	2.142	0.307297	0.410959	0.672354	2.436	0.315184	0.440644	0.690328
ILL.dhbC-BSU31990.1~1197	1.995	0.288633	0.377891	0.663073	2.508	0.431538	0.53971	0.646478	3.6	0.527382	0.78887	0.718604	5.131	0.47586	0.816372	0.765227
ILL.rplI-BSU40500.1~450	1.628	0.277813	0.367036	0.669284	1.673	0.323166	0.403524	0.644565	1.993	0.363697	0.443781	0.635985	1.771	0.382631	0.442955	0.612286
ILL.ysaA-BSU28940.37~819	1.668	0.285603	0.364874	0.656045	1.641	0.368893	0.435049	0.624983	2.477	0.445476	0.558067	0.648709	2.512	0.440201	0.52273	0.625682
ILL.topA-BSU16120.26~2101	2.461	0.304956	0.372834	0.635836	2.02	0.383591	0.466411	0.635293	3.739	0.512388	0.641108	0.64454	3.601	0.462555	0.603443	0.658724
ILL.ohrR-BSU13150.16~459	1.321	0.21956	0.346798	0.741726	1.115	0.277817	0.35888	0.664064	2.051	0.305991	0.444852	0.703036	2.317	0.341037	0.561138	0.757496
ILL.ykuJ-BSU14100.552~791	1.525	0.190765	0.353422	0.796637	2.053	0.221729	0.400192	0.786778	3.079	0.274027	0.536794	0.806004	2.214	0.239565	0.440943	0.791918
ILL.yxiG-BSU39190.1~417	1.749	0.229962	0.375692	0.75031	1.095	0.243924	0.293159	0.632194	2.118	0.304114	0.507066	0.760206	1.284	0.212863	0.308085	0.708733
ILL.yqgV-BSU24810.1~315	1.657	0.248754	0.385677	0.734322	1.662	0.319497	0.419435	0.669834	1.686	0.307901	0.405457	0.669349	1.73	0.308749	0.387463	0.646515
ILL.yshC-BSU28590.1~1713	1.823	0.274875	0.371442	0.678577	1.624	0.329748	0.401357	0.637184	2.482	0.365595	0.497773	0.681472	2.168	0.340082	0.476779	0.694576
ILL.yitR-BSU11090.1~294	1.904	0.229407	0.388228	0.760956	1.164	0.227431	0.315707	0.692393	1.685	0.248829	0.425815	0.767564	1.253	0.215577	0.329069	0.724082
ILL.ygzB-BSU08740.6~359	2.006	0.272718	0.38137	0.685933	1.837	0.342852	0.450841	0.666335	2.911	0.526114	0.733374	0.693422	2.376	0.454517	0.62839	0.690935
ILL.murAA-BSU36760.34~1344	1.475	0.296748	0.350342	0.620417	2.12	0.305706	0.373726	0.630542	1.709	0.309509	0.360738	0.615432	2.042	0.34532	0.405595	0.613395
ILL.yqgN-BSU24890.85~648	1.896	0.273633	0.374136	0.678981	2.149	0.345725	0.42823	0.638168	3.706	0.480334	0.648428	0.673547	3.549	0.511321	0.748838	0.708826
ILL.tpx-BSU29490.25~528	1.713	0.326168	0.363832	0.596892	1.698	0.388011	0.43054	0.59741	2.13	0.503424	0.565239	0.599871	1.955	0.458542	0.491983	0.581717
ILL.yrrM-BSU27360.12~665	1.894	0.289636	0.372949	0.652782	1.772	0.270178	0.333875	0.632447	1.669	0.297695	0.355091	0.624431	1.561	0.292941	0.362414	0.641442
ILL.cca-BSU22450.5~1198	1.909	0.278473	0.372095	0.673488	1.758	0.332995	0.409016	0.638735	2.561	0.367745	0.477991	0.660202	2.329	0.376188	0.520991	0.687622
ILL.serS-BSU00130.57~1334	1.902	0.325843	0.362968	0.594132	1.602	0.356771	0.400746	0.603373	2.226	0.383115	0.449034	0.617481	2.008	0.379911	0.444878	0.618074
ILL.ylxF-BSU16260.1~615	1.732	0.268752	0.362526	0.677827	1.757	0.334864	0.42359	0.652682	3.154	0.456069	0.696148	0.725669	2.551	0.353181	0.526484	0.716911
ILL.nrdF-BSU20040.1~1798	3.854	0.137394	0.501743	0.936277	4.064	0.151448	0.543416	0.933257	4.416	0.160606	0.58394	0.936322	3.946	0.187251	0.587229	0.915832
ILL.sucD-BSU16100.1~903	1.478	0.339194	0.365917	0.584877	1.942	0.365368	0.436175	0.622818	1.938	0.463842	0.484488	0.570836	2.193	0.460167	0.50321	0.588122
ILL.fliY-BSU16320.1~1137	1.68	0.30884	0.36105	0.614281	2.07	0.451205	0.510312	0.604838	3.308	0.588551	0.765591	0.660004	2.837	0.487359	0.616024	0.647111
ILL.mprF-BSU08425.35~2605	1.77	0.256387	0.366445	0.700285	1.968	0.309368	0.403404	0.661775	2.314	0.330486	0.499149	0.721638	2.533	0.319431	0.495119	0.731527
ILL.ypzF-BSU22019.60~206	1.432	0.255793	0.367329	0.705668	1.341	0.223314	0.306793	0.685788	1.813	0.312752	0.414094	0.670266	1.177	0.257298	0.329276	0.655925
ILL.ylmG-BSU15400.7~279	1.748	0.246719	0.358478	0.697482	1.36	0.243264	0.313491	0.655038	1.909	0.273579	0.360922	0.656884	1.495	0.28376	0.361934	0.645158
ILL.yqfA-BSU25380.1~996	1.504	0.30997	0.359143	0.616067	2.157	0.37227	0.478422	0.654294	2.546	0.48485	0.58212	0.628922	2.813	0.534468	0.67756	0.654427
ILL.yabO-BSU00590.3~263	1.559	0.30946	0.368297	0.62313	1.64	0.337043	0.393303	0.606999	1.644	0.355727	0.413547	0.617515	2.064	0.325036	0.447053	0.685431
ILL.yhdH-BSU09470.11~1366	1.862	0.252716	0.369903	0.708283	1.596	0.323206	0.388093	0.63064	2.704	0.352153	0.495009	0.690387	3.305	0.372723	0.597429	0.743298
ILL.fur-BSU23520.22~471	1.696	0.302439	0.373725	0.638185	1.652	0.371435	0.434209	0.620189	1.661	0.361235	0.444644	0.642148	1.771	0.370478	0.448789	0.635616
ILL.gmuD-BSU05840.18~1415	2.194	0.22447	0.376839	0.76028	1.385	0.246846	0.31037	0.64935	2.041	0.238359	0.391451	0.753795	2.517	0.24183	0.434111	0.782665
ILL.ung-BSU37970.14~691	2.084	0.168145	0.370281	0.844615	1.755	0.205991	0.37291	0.786403	2.185	0.21458	0.370364	0.765388	1.895	0.205957	0.399918	0.81016
ILL.yjbL-BSU11590.14~382	1.444	0.266832	0.352974	0.671752	1.327	0.317089	0.371763	0.622967	1.969	0.402495	0.504191	0.646557	1.357	0.309974	0.364209	0.623805
ILL.yxzE-BSU38790.7~207	2.131	0.153693	0.387741	0.875206	2.239	0.178808	0.396972	0.841493	2.901	0.228167	0.50724	0.84296	2.168	0.193282	0.437504	0.84966
ILL.ispG-BSU25070.18~1151	1.782	0.282394	0.36988	0.665573	1.666	0.335414	0.410023	0.637383	2.196	0.403797	0.497357	0.639388	2.227	0.385177	0.469279	0.636412
ILL.mutSB-BSU28580.1~2358	1.951	0.268452	0.369591	0.685794	2.003	0.351318	0.433853	0.643989	2.752	0.338416	0.470881	0.68928	2.814	0.358265	0.521238	0.707588
ILL.yojO-BSU19380.1~1917	2.178	0.253117	0.373558	0.71194	1.626	0.283284	0.367058	0.664673	1.886	0.294913	0.408865	0.690109	1.729	0.261433	0.372259	0.699604
ILL.yccK-BSU02770.76~1008	1.88	0.246228	0.373853	0.724784	2.093	0.34299	0.460357	0.677952	4.14	0.414855	0.749569	0.785056	2.475	0.295707	0.489769	0.756531
ILL.priA-BSU15710.1~2418	1.853	0.234334	0.370965	0.739491	1.81	0.292793	0.377102	0.656882	2.522	0.287589	0.465882	0.745974	2.412	0.274126	0.432398	0.736651
ILL.hepS-BSU22760.164~919	1.751	0.262354	0.361017	0.6849	1.762	0.323952	0.410444	0.65272	3.058	0.38184	0.558829	0.709676	2.623	0.369138	0.542631	0.712868
ILL.nrdI-BSU17370.24~416	1.55	0.28999	0.365303	0.651524	1.615	0.32662	0.41045	0.646516	1.879	0.376096	0.463923	0.64204	1.713	0.297543	0.407496	0.684055
ILL.yneF-BSU17910.12~230	1.549	0.279252	0.373374	0.67433	1.532	0.303709	0.376082	0.643214	1.467	0.314699	0.358186	0.606922	1.356	0.313913	0.323891	0.561995
ILL.dnaC-BSU40440.19~1383	1.86	0.260349	0.374275	0.701332	1.909	0.300638	0.406626	0.679686	2.76	0.340549	0.463166	0.676685	2.292	0.334443	0.468784	0.690315
ILL.yabA-BSU00330.15~374	1.707	0.295972	0.366797	0.642998	1.364	0.288591	0.359147	0.647922	1.459	0.332856	0.380424	0.608136	1.196	0.268635	0.299371	0.599705
ILL.yxeB-BSU39610.41~1006	1.77	0.309808	0.362415	0.619437	2.677	0.365975	0.465107	0.65096	2.717	0.47687	0.602714	0.651332	3.196	0.511611	0.689444	0.674857
ILL.yneQ-BSU18050.16~315	1.89	0.255314	0.392589	0.724255	1.624	0.356692	0.438395	0.64191	2.715	0.326526	0.600837	0.791396	2.069	0.265532	0.415795	0.734578
ILL.yvlC-BSU35110.1~198	1.247	0.235631	0.357738	0.729677	1.15	0.236012	0.3054	0.662266	1.186	0.228036	0.300954	0.668424	1.637	0.273762	0.376832	0.678734
ILL.tagH-BSU35700.1~1584	1.642	0.281924	0.363444	0.659885	2.272	0.362115	0.433683	0.62973	2.26	0.405266	0.506688	0.649116	2.027	0.391029	0.472772	0.632821
ILL.sipT-BSU14410.35~616	1.873	0.302861	0.373291	0.637738	2.06	0.422	0.48209	0.610185	3.077	0.462935	0.641965	0.685682	2.603	0.438676	0.606128	0.690059
ILL.ydbT-BSU04600.1~1482	1.939	0.258698	0.37139	0.694395	1.475	0.293976	0.367277	0.648764	2.026	0.339236	0.449169	0.670758	2.298	0.355408	0.490773	0.687164
ILL.recR-BSU00210.14~610	1.669	0.296763	0.373849	0.646254	1.398	0.294839	0.338169	0.61069	1.713	0.334849	0.395393	0.621011	1.797	0.333582	0.442634	0.672061
ILL.yqjT-BSU23750.4~390	1.601	0.25814	0.367996	0.700895	1.692	0.30936	0.421648	0.684713	2.471	0.379708	0.550599	0.70784	2.334	0.353125	0.5614	0.74448
ILL.ydiS-BSU06100.1~1032	1.494	0.252891	0.35607	0.693802	2.005	0.330193	0.439104	0.672294	3.746	0.478146	0.749608	0.734744	3.211	0.376784	0.590465	0.735395
ILL.oppA-BSU11430.132~1769	1.799	0.286329	0.357366	0.644061	1.988	0.384835	0.449797	0.618973	3.71	0.555861	0.749425	0.676095	3.054	0.472259	0.61786	0.664352
ILL.ecsC-BSU10060.18~728	1.526	0.249293	0.358121	0.702012	1.734	0.323155	0.395912	0.639216	2.667	0.375223	0.530884	0.695457	1.796	0.266348	0.372997	0.690852
ILL.yhgC-BSU10100.6~506	1.612	0.312053	0.366208	0.621346	1.713	0.329589	0.416306	0.651608	1.959	0.383871	0.467379	0.637466	1.728	0.339027	0.42071	0.64534
ILL.ywrO-BSU35990.12~539	1.711	0.243996	0.366742	0.717394	1.344	0.24088	0.30242	0.644941	1.631	0.311398	0.375966	0.630922	1.396	0.256779	0.302414	0.621522
ILL.ywdK-BSU37930.62~433	2.173	0.249634	0.390547	0.730995	1.513	0.342716	0.395132	0.615012	1.687	0.309525	0.421884	0.686043	2.126	0.307322	0.410202	0.666631
ILL.fliL-BSU16300.1~423	1.892	0.261505	0.383104	0.70926	1.915	0.37063	0.487973	0.669431	2.971	0.402394	0.746867	0.79633	2.59	0.368702	0.616147	0.761731
ILL.yhbJ-BSU09000.36~701	1.74	0.242215	0.373514	0.729774	1.721	0.274934	0.357759	0.66248	2.521	0.286118	0.477621	0.752497	1.855	0.249178	0.413537	0.758358
ILL.yqeM-BSU25610.1~744	2.029	0.275324	0.378708	0.677888	1.792	0.319688	0.399505	0.645477	2.32	0.382289	0.509443	0.669156	2.556	0.419524	0.55168	0.661272
ILL.ymcA-BSU17020.1~432	1.491	0.230951	0.359652	0.734383	1.55	0.301504	0.376579	0.649568	1.644	0.300687	0.408347	0.683784	1.854	0.285992	0.380032	0.671206
ILL.yueB-BSU31860.1~3231	2.418	0.202737	0.382062	0.79799	1.015	0.155469	0.199196	0.656308	0.999	0.147074	0.204192	0.690928	1.059	0.136515	0.188866	0.686301
ILL.ylaM-BSU14830.1~930	2.099	0.179093	0.37834	0.830938	2.022	0.245759	0.474777	0.807284	4.805	0.225193	0.589234	0.878843	3.752	0.172751	0.517129	0.904356
ILL.nagBA-BSU35020.1~729	1.525	0.239058	0.368223	0.731053	1.337	0.270289	0.340141	0.651177	1.316	0.21452	0.308444	0.703319	1.657	0.219964	0.326995	0.715144
ILL.ftsL-BSU15150.1~354	1.661	0.248305	0.360168	0.705153	1.621	0.260819	0.382081	0.713129	2.204	0.31791	0.48761	0.7299	2.002	0.333153	0.468877	0.696584
ILL.dapL-BSU14190.70~1194	1.879	0.26709	0.368847	0.686017	1.521	0.33458	0.424959	0.657904	2.285	0.340648	0.470457	0.68536	2.133	0.325689	0.456046	0.690916
ILL.ygaC-BSU08680.61~591	1.597	0.257909	0.366168	0.69808	2.114	0.393512	0.514169	0.663204	2.712	0.467718	0.639002	0.683281	2.886	0.448509	0.678014	0.724891
ILL.yisL-BSU10760.6~362	1.62	0.264287	0.369744	0.692924	1.397	0.29624	0.354737	0.626271	1.495	0.279269	0.340371	0.637045	1.434	0.280228	0.347503	0.64189
ILL.yvyI-BSU35790.135~1085	1.986	0.311617	0.373761	0.625836	1.98	0.376242	0.446084	0.626975	2.692	0.445809	0.546194	0.638005	2.572	0.43643	0.562861	0.660492
ILL.sucA-BSU19370.5~2839	2.046	0.329866	0.364793	0.593314	2.02	0.363485	0.429535	0.621712	2.265	0.443877	0.481845	0.585684	2.126	0.416698	0.443289	0.576458
ILL.dnaE-BSU29230.23~3370	1.96	0.258887	0.37752	0.708257	2.134	0.320202	0.405152	0.652631	3.469	0.332113	0.512468	0.728551	3.809	0.327146	0.523775	0.741986
ILL.dnaB-BSU28990.115~1533	2.133	0.260789	0.375547	0.70368	2.038	0.351705	0.436756	0.643746	2.964	0.35024	0.539858	0.72951	2.802	0.326368	0.516314	0.74042
ILL.glpT-BSU02140.145~1479	1.783	0.275366	0.362534	0.664711	1.84	0.329463	0.410008	0.643828	2.677	0.377782	0.498196	0.664431	4.643	0.466991	0.780835	0.754493
ILL.fliH-BSU16230.1~627	1.857	0.30334	0.383209	0.651296	1.574	0.393891	0.456551	0.618838	3.407	0.528639	0.876368	0.756958	2.489	0.348072	0.554106	0.739652
ILL.ysdA-BSU28840.57~326	2.276	0.164138	0.379873	0.856059	1.511	0.170622	0.309199	0.785994	1.902	0.170657	0.368116	0.839331	1.911	0.17171	0.396632	0.857618
ILL.tcyC-BSU03590.14~757	1.802	0.252927	0.374246	0.715107	1.426	0.264688	0.336847	0.655275	1.831	0.273591	0.372634	0.677137	1.852	0.260504	0.415776	0.743704
ILL.nupC-BSU39410.12~1193	1.945	0.274025	0.383989	0.689875	1.648	0.319681	0.359614	0.603567	2.519	0.376628	0.478266	0.651907	2.073	0.339012	0.484394	0.702782
ILL.yobK-BSU18990.1~459	2.491	0.213294	0.433467	0.81032	2.163	0.338328	0.52569	0.734908	5.697	0.308609	0.847176	0.887314	3.377	0.250954	0.493156	0.799515
ILL.pcrB-BSU06600.16~702	1.681	0.299958	0.373178	0.645928	1.369	0.299438	0.332026	0.59607	2.088	0.357625	0.476492	0.673703	2.215	0.362423	0.485545	0.67494
ILL.phrI-BSU05020.1~120	1.303	0.279426	0.363654	0.665821	1.253	0.284074	0.370506	0.666816	1.476	0.445019	0.493669	0.599968	2.123	0.364481	0.48756	0.669907
ILL.yfmD-BSU07510.69~1070	2.111	0.237327	0.380031	0.742633	1.91	0.312856	0.432016	0.686405	3.132	0.322495	0.520649	0.737287	3.561	0.364529	0.666072	0.786216
ILL.yrbC-BSU27820.9~731	2.111	0.239743	0.375913	0.730706	1.893	0.350374	0.464986	0.672261	2.26	0.304628	0.481391	0.736315	2.268	0.295414	0.47822	0.746474
ILL.yloU-BSU15830.82~444	1.386	0.302374	0.349292	0.609244	1.744	0.335416	0.414234	0.639379	2.016	0.404242	0.522276	0.663128	1.752	0.40847	0.476677	0.619299
ILL.tagG-BSU35710.165~992	2.091	0.246711	0.371134	0.7195	1.548	0.26224	0.35159	0.675719	1.893	0.32421	0.454334	0.694938	2.484	0.305096	0.470443	0.727006
ILL.ytkP-BSU29970.24~959	1.703	0.252366	0.362781	0.701698	1.576	0.312606	0.373271	0.628081	2.41	0.319241	0.439528	0.68414	2.294	0.324839	0.447658	0.685003
ILL.alrA-BSU04640.22~1191	1.727	0.277689	0.36798	0.671176	1.532	0.317308	0.38322	0.633906	1.988	0.334185	0.419366	0.646383	2.386	0.366663	0.52251	0.698341
ILL.oppB-BSU11440.108~1043	1.569	0.25157	0.363502	0.70677	1.489	0.267694	0.362577	0.681435	2.855	0.339272	0.612653	0.784685	2.889	0.337771	0.598009	0.778205
ILL.polC-BSU16580.109~4422	2.222	0.25822	0.375177	0.707024	1.721	0.312396	0.376282	0.632111	2.395	0.304855	0.433906	0.697437	2.427	0.306777	0.443191	0.70445
ILL.yncF-BSU17660.1~435	1.847	0.189481	0.36904	0.81106	1.634	0.190094	0.318519	0.759472	2.524	0.250483	0.48821	0.810534	1.932	0.183794	0.33719	0.784105
ILL.yhfJ-BSU10250.13~1008	1.496	0.289655	0.360992	0.646144	2.171	0.392225	0.467712	0.627697	2.586	0.432812	0.55942	0.660308	3.174	0.46859	0.660347	0.695086
ILL.ptsG-BSU13890.229~2328	1.94	0.298629	0.362549	0.62944	1.724	0.328011	0.395054	0.629382	1.859	0.368007	0.401516	0.58598	1.695	0.344104	0.371439	0.581304
ILL.ytiB-BSU30690.18~581	1.718	0.267528	0.360064	0.677331	2.723	0.398816	0.497586	0.636821	3.481	0.466147	0.730614	0.736239	2.397	0.39894	0.611025	0.731138
ILL.ywqA-BSU36280.1~2769	1.898	0.247692	0.374532	0.722287	1.756	0.282357	0.377475	0.674819	2.131	0.280845	0.4164	0.715755	2.532	0.305205	0.493527	0.747166
ILL.yqiG-BSU24210.217~1335	1.528	0.265072	0.364508	0.688062	2.072	0.350945	0.435694	0.644743	2.411	0.347453	0.510237	0.71216	2.986	0.376039	0.609955	0.749573
ILL.gapA-BSU33940.12~1019	2.334	0.322976	0.371663	0.6061	1.861	0.303805	0.367234	0.624921	1.918	0.334835	0.358555	0.575272	1.739	0.304607	0.335535	0.581463
ILL.adeC-BSU14520.154~1887	1.784	0.253947	0.373075	0.7114	1.64	0.259769	0.341063	0.667858	2.248	0.293645	0.432748	0.71121	2.041	0.267171	0.39592	0.716891
ILL.yhdP-BSU09550.15~1349	1.809	0.260829	0.364617	0.691894	1.64	0.329582	0.402992	0.638132	1.947	0.345159	0.446464	0.660977	2.091	0.338948	0.448278	0.669107
ILL.sspL-BSU22000.1~129	1.859	0.145775	0.354223	0.869863	2.059	0.132828	0.345975	0.877889	2.705	0.169331	0.465522	0.893098	1.893	0.148841	0.359931	0.867581
ILL.nucA-BSU03430.1~444	1.59	0.309276	0.376137	0.633305	1.627	0.340812	0.401161	0.622679	2.077	0.411054	0.502348	0.640688	2.307	0.368607	0.48508	0.668628
ILL.yaaQ-BSU00290.42~371	1.678	0.284983	0.377325	0.669891	1.759	0.362453	0.444111	0.639463	2.353	0.474061	0.603835	0.655729	1.967	0.344447	0.460451	0.676366
ILL.yqgQ-BSU24860.1~216	1.438	0.319816	0.381216	0.627569	1.824	0.380561	0.420773	0.593816	3.468	0.525684	0.79072	0.718368	2.407	0.388306	0.56981	0.712819
ILL.minD-BSU27990.1~807	1.585	0.298342	0.362348	0.635496	1.448	0.29191	0.342098	0.619411	1.695	0.320045	0.396543	0.641272	2.104	0.368899	0.427556	0.60806
ILL.ywhC-BSU37530.6~665	1.745	0.251194	0.375582	0.719783	1.517	0.28276	0.372125	0.669461	2.059	0.347168	0.477991	0.687759	2.894	0.408244	0.59992	0.710244
ILL.ylxL-BSU16480.21~524	1.816	0.274638	0.366843	0.665097	1.688	0.396836	0.473127	0.630286	4.895	0.550924	0.846026	0.71991	4.115	0.459813	0.711682	0.725729
ILL.pheB-BSU27910.51~494	1.617	0.282835	0.361835	0.657773	1.643	0.328729	0.417443	0.652476	2.455	0.51103	0.66372	0.663963	2.684	0.509212	0.639222	0.650419
ILL.yfiZ-BSU08450.64~1065	1.767	0.260174	0.356826	0.68173	1.758	0.321245	0.404788	0.650205	2.811	0.426662	0.570105	0.667665	3.924	0.47087	0.759826	0.743991
ILL.yfmF-BSU07490.1~801	2.047	0.23829	0.376192	0.738229	1.927	0.295613	0.409787	0.688334	2.866	0.308338	0.524868	0.762977	2.908	0.327806	0.556225	0.763331
ILL.yvrC-BSU33180.255~1199	2.015	0.294272	0.370914	0.645359	1.716	0.328817	0.390253	0.625757	2.271	0.366381	0.460198	0.647564	2.108	0.327961	0.406952	0.639217
ILL.ydbK-BSU04500.20~760	2.107	0.253925	0.380571	0.717637	1.806	0.329828	0.414428	0.65049	3.146	0.368698	0.535205	0.702458	2.683	0.365798	0.586071	0.740347
ILL.ypoP-BSU21700.80~505	1.786	0.272545	0.381839	0.693349	1.843	0.340309	0.440106	0.662196	2.884	0.433342	0.657517	0.72545	2.477	0.383404	0.558687	0.710395
ILL.ytzG-BSU30035.59~778	1.578	0.267368	0.373082	0.694296	2.02	0.342388	0.456176	0.67031	2.338	0.375995	0.498624	0.667675	3.037	0.342126	0.530703	0.731193
ILL.ylmA-BSU15340.1~795	2.235	0.162558	0.397539	0.86707	2.094	0.193072	0.377494	0.805927	5.416	0.159476	0.54975	0.921663	5.438	0.166542	0.541073	0.913041
ILL.yozE-BSU19680.21~245	1.738	0.211339	0.363505	0.768147	1.233	0.273017	0.34967	0.659601	1.434	0.238033	0.352931	0.712828	1.532	0.268033	0.370322	0.68797
ILL.yjoB-BSU12420.16~1287	2.165	0.286561	0.370587	0.659711	1.753	0.350428	0.41567	0.624816	2.763	0.428981	0.553588	0.657365	2.518	0.387601	0.502224	0.65749
ILL.ylbA-BSU14940.17~379	1.251	0.280382	0.353729	0.651984	1.508	0.352702	0.426521	0.63709	2.521	0.549635	0.725707	0.672472	2.455	0.41827	0.549805	0.669323
ILL.yyaK-BSU40830.19~918	2.353	0.209493	0.377192	0.782553	2.857	0.234263	0.431699	0.790495	4.769	0.329366	0.657472	0.808218	4.567	0.297901	0.614785	0.819332
ILL.ycsD-BSU04030.1~393	1.523	0.263506	0.364844	0.691097	1.374	0.275194	0.336467	0.637674	2.259	0.361378	0.472138	0.666828	1.692	0.267389	0.358726	0.667226
ILL.cysE-BSU00930.124~777	1.716	0.275565	0.373235	0.681747	1.649	0.317139	0.392832	0.643356	2.61	0.365565	0.463952	0.650787	1.966	0.358889	0.491912	0.68713
ILL.ywzD-BSU36269.67~210	1.737	0.193438	0.381082	0.814368	0.855	0.16581	0.219011	0.668001	1.558	0.218943	0.349002	0.739246	0.833	0.15559	0.221039	0.699864
ILL.ylxY-BSU16700.118~1077	1.747	0.27403	0.363631	0.672694	1.751	0.337871	0.411875	0.638223	2.889	0.372963	0.533877	0.697708	2.533	0.368292	0.542837	0.712595
ILL.ywbE-BSU38350.4~201	1.512	0.21996	0.362822	0.75311	1.976	0.29024	0.416546	0.697804	1.528	0.30028	0.386736	0.658534	1.934	0.35937	0.475947	0.672809
ILL.sdhB-BSU28430.3~764	1.469	0.326135	0.359779	0.593059	1.913	0.381036	0.434347	0.604313	1.841	0.366773	0.412383	0.600072	1.73	0.392028	0.423609	0.585257
ILL.yceE-BSU02910.1~579	1.788	0.273172	0.355321	0.660091	1.583	0.283026	0.342073	0.629185	1.787	0.295277	0.375128	0.653698	1.927	0.333478	0.417095	0.645352
ILL.fabG-BSU15910.1~741	1.58	0.309383	0.368347	0.626264	1.739	0.364582	0.440839	0.633553	2.213	0.408552	0.47594	0.613939	2.604	0.462023	0.525405	0.601071
ILL.mtlA-BSU03981.1~1437	2.076	0.186269	0.390834	0.828714	2.763	0.25949	0.429145	0.745528	1.2	0.193323	0.27561	0.699909	1.32	0.227024	0.290186	0.654717
ILL.fhuD-BSU33320.37~984	1.574	0.310398	0.364214	0.621075	2.026	0.37628	0.484036	0.659392	3.415	0.530933	0.697517	0.668234	3.105	0.553592	0.717366	0.662134
ILL.yuzK-BSU32719.54~191	1.39	0.247808	0.371359	0.724433	1.432	0.276298	0.380866	0.691204	1.075	0.209731	0.285251	0.684864	1.132	0.232548	0.295461	0.654116
ILL.ytpS-BSU29805.143~3001	1.916	0.268238	0.366675	0.679689	1.991	0.325336	0.405398	0.64589	2.462	0.347995	0.475116	0.68134	2.492	0.348099	0.477613	0.683048
ILL.dat-BSU09670.106~954	1.847	0.256683	0.36952	0.700807	1.942	0.35979	0.453584	0.65147	3.601	0.450731	0.705063	0.734342	2.984	0.377373	0.573713	0.723917
ILL.ynzD-BSU17920.65~238	1.317	0.223244	0.356726	0.7486	1.285	0.211447	0.315645	0.717965	1.702	0.196618	0.300043	0.717104	0.793	0.142033	0.206832	0.712352
ILL.ylqC-BSU16000.1~246	2.435	0.303543	0.431818	0.675704	2.294	0.336026	0.478771	0.686872	1.933	0.403716	0.460977	0.601381	1.626	0.365276	0.439792	0.629191
ILL.dhaS-BSU19310.106~1593	2.496	0.261186	0.390596	0.707339	2.412	0.297867	0.407694	0.679354	3.288	0.385077	0.591405	0.722198	2.661	0.365351	0.583289	0.741449
ILL.yvfG-BSU34210.246~464	1.915	0.20635	0.378465	0.79071	1.637	0.205354	0.374115	0.789208	2.552	0.229506	0.448824	0.808707	2.101	0.217659	0.439322	0.821397
ILL.lexA-BSU17850.11~628	1.513	0.292163	0.361396	0.644719	1.685	0.311846	0.384518	0.638661	1.922	0.367253	0.458596	0.646379	1.754	0.379202	0.446506	0.621441
ILL.citB-BSU18000.82~2811	1.97	0.333726	0.374281	0.597008	2.039	0.384774	0.456851	0.626101	3.355	0.564508	0.656217	0.614841	3.518	0.57105	0.681368	0.627804
ILL.ykzF-BSU14120.134~331	1.769	0.257919	0.360575	0.683744	1.687	0.344406	0.444664	0.662009	1.799	0.381588	0.42772	0.599986	2.434	0.42205	0.54489	0.655634
ILL.ycgL-BSU03190.84~866	1.918	0.231007	0.367835	0.740707	1.405	0.247612	0.302424	0.635175	2.395	0.267306	0.445167	0.754997	1.571	0.235854	0.355984	0.723192
ILL.yfiT-BSU08390.17~553	2.287	0.213172	0.381463	0.780302	2.04	0.287226	0.425623	0.716775	2.743	0.314259	0.517857	0.755542	2.61	0.26995	0.452792	0.759567
ILL.cysH-BSU15570.162~863	1.518	0.260319	0.359776	0.687057	1.323	0.278035	0.367237	0.673179	2.608	0.319951	0.479144	0.713891	1.628	0.268986	0.374036	0.69032
ILL.infC-BSU28870.59~580	1.53	0.317601	0.374619	0.623507	1.763	0.329096	0.381298	0.609186	1.599	0.366542	0.389358	0.575644	1.723	0.377714	0.423057	0.600369
ILL.deoC-BSU39420.1~672	1.886	0.305727	0.364855	0.621747	1.632	0.333183	0.396517	0.625	2.106	0.419515	0.510294	0.634631	2.231	0.454933	0.519785	0.611104
ILL.lepA-BSU25510.23~1861	1.649	0.290381	0.367014	0.652801	1.939	0.342043	0.404442	0.62401	2.201	0.376534	0.456176	0.632781	2.168	0.349748	0.441283	0.64915
ILL.trmB-BSU29900.1~642	1.644	0.311737	0.37349	0.629955	1.932	0.395706	0.445887	0.600443	2.112	0.394651	0.463601	0.618114	1.884	0.379648	0.470171	0.641515
ILL.nosA-BSU07630.13~1104	2.002	0.264081	0.373095	0.696922	2.074	0.352559	0.462904	0.667526	4.041	0.475097	0.747133	0.737845	2.957	0.395243	0.654797	0.757939
ILL.rpmJ-BSU01400.1~114	1.765	0.310296	0.402727	0.65224	0.896	0.259481	0.277295	0.582781	1.616	0.397889	0.417878	0.569077	1.294	0.2665	0.297114	0.587071
ILL.deoD-BSU19630.71~772	1.659	0.327701	0.367059	0.594615	2.324	0.408878	0.488325	0.624866	2.337	0.512179	0.54966	0.579613	1.86	0.441264	0.483627	0.592362
ILL.yloA-BSU15640.13~1731	2.055	0.259539	0.372148	0.698353	1.853	0.325191	0.410719	0.650899	2.486	0.323055	0.456012	0.693536	2.9	0.350989	0.549053	0.734569
ILL.ydbJ-BSU04490.75~1001	1.733	0.285718	0.361357	0.651889	1.779	0.316578	0.385769	0.637941	2.192	0.381383	0.50515	0.671297	2.998	0.376387	0.525725	0.687235
ILL.yizC-BSU11139.45~242	2.459	0.277538	0.439091	0.712138	1.877	0.338874	0.497866	0.711613	2.289	0.402916	0.582732	0.70784	2.243	0.427891	0.614924	0.707197
ILL.yfjO-BSU08020.1~1401	2.071	0.24072	0.37858	0.73516	1.965	0.305731	0.407793	0.673887	2.152	0.297794	0.4379	0.714282	3.27	0.325992	0.57547	0.77671
ILL.dapF-BSU32170.21~875	1.692	0.280881	0.356734	0.651768	1.7	0.326315	0.377734	0.613701	1.99	0.375454	0.463096	0.636506	1.956	0.391732	0.465815	0.626686
ILL.pfkA-BSU29190.1~960	1.932	0.328989	0.360192	0.587797	1.695	0.375375	0.403209	0.581029	2.198	0.452922	0.484769	0.577401	2.123	0.470146	0.497535	0.575143
ILL.lpdV-BSU24060.21~1445	1.916	0.264099	0.36954	0.691242	1.755	0.32708	0.393998	0.633271	2.668	0.390659	0.502976	0.658011	2.219	0.308133	0.402838	0.664086
ILL.bscR-BSU27170.181~765	1.843	0.177796	0.375125	0.83133	1.398	0.195836	0.286141	0.708586	2.043	0.194646	0.379323	0.809665	2.057	0.176743	0.373067	0.827688
ILL.yocI-BSU19220.142~1917	2.403	0.201059	0.38718	0.802042	1.915	0.262665	0.396163	0.722588	2.838	0.243415	0.534527	0.84141	3.129	0.215907	0.487076	0.847321
ILL.yesJ-BSU06920.32~574	1.536	0.264496	0.366717	0.691532	1.848	0.311738	0.394592	0.651395	1.881	0.337854	0.424859	0.65033	1.886	0.331508	0.453962	0.683948
ILL.yycC-BSU40470.11~151	1.485	0.273961	0.372902	0.681134	1.139	0.318097	0.368174	0.615463	1.989	0.384602	0.574982	0.71953	1.497	0.30866	0.438912	0.704797
ILL.ubiE-BSU22750.1~702	1.793	0.28929	0.370212	0.652167	1.864	0.33741	0.389429	0.606634	2.618	0.536266	0.640712	0.629506	2.331	0.455707	0.566056	0.646881
ILL.ylxH-BSU16410.1~897	1.719	0.276676	0.364567	0.669625	1.756	0.376109	0.462315	0.640413	3.566	0.493875	0.779756	0.737482	3.56	0.422707	0.703473	0.754483
ILL.yvrN-BSU33260.1~1230	2.576	0.24186	0.380981	0.732928	2.262	0.32307	0.415984	0.657635	3.761	0.373607	0.575076	0.723514	3.221	0.337684	0.527434	0.732694
ILL.yrzB-BSU27380.18~299	1.576	0.366342	0.363031	0.545445	1.923	0.443129	0.512835	0.615661	2.64	0.641535	0.654199	0.56036	2.192	0.573381	0.588368	0.565274
ILL.pyrP-BSU15480.53~1360	1.776	0.28312	0.365189	0.654577	2.092	0.40994	0.521171	0.656089	2.43	0.3823	0.47601	0.643538	2.98	0.442613	0.56735	0.650579
ILL.accC-BSU24340.12~1364	1.715	0.312338	0.359227	0.610822	1.886	0.354719	0.41615	0.617109	2.571	0.445895	0.536191	0.627898	2.45	0.429464	0.50857	0.623452
ILL.mccA-BSU27260.5~928	1.496	0.229597	0.359499	0.737757	1.253	0.22722	0.290934	0.656652	1.765	0.258938	0.372328	0.703498	1.391	0.20064	0.277812	0.684475
ILL.ywjA-BSU37230.22~1749	1.974	0.2993	0.373091	0.64249	2.437	0.419208	0.501434	0.630453	2.59	0.443776	0.567143	0.655428	3.478	0.499184	0.758936	0.726504
ILL.rnhB-BSU16060.71~838	1.513	0.242373	0.367186	0.727614	1.808	0.343325	0.484164	0.699819	3.523	0.321509	0.55267	0.768032	2.88	0.347233	0.610827	0.778013
ILL.yneB-BSU17870.19~672	1.7	0.251526	0.368525	0.71408	1.75	0.296946	0.408092	0.686648	2.977	0.377463	0.626571	0.755309	2.728	0.376222	0.654447	0.775767
ILL.trxA-BSU28500.1~315	1.512	0.2623	0.345532	0.665402	1.774	0.323818	0.401295	0.637653	2.161	0.386224	0.476105	0.641002	1.927	0.350018	0.450068	0.657131
ILL.yxeI-BSU39540.39~1025	1.86	0.248397	0.37072	0.71805	1.837	0.283002	0.38992	0.686517	2.664	0.377338	0.58673	0.733582	3.002	0.349563	0.595853	0.768314
ILL.yojE-BSU19480.17~913	2.285	0.22152	0.38542	0.766728	1.892	0.276158	0.368692	0.671288	1.879	0.282671	0.429177	0.723767	2.921	0.25536	0.48272	0.795413
ILL.yacP-BSU00970.7~519	1.828	0.341794	0.365324	0.573177	1.856	0.459948	0.515208	0.602118	2.288	0.474442	0.574997	0.63459	2.815	0.540551	0.664473	0.637202
ILL.mrpG-BSU31660.1~375	1.235	0.224032	0.347897	0.734048	1.584	0.249436	0.335415	0.66484	1.93	0.259506	0.429031	0.750469	2.482	0.300404	0.512684	0.765345
ILL.yvoD-BSU34980.24~962	1.611	0.289671	0.368817	0.656545	1.905	0.337963	0.426389	0.650135	2.123	0.3881	0.526367	0.68279	2.29	0.397251	0.534329	0.677314
ILL.ykoA-BSU14420.41~310	2.096	0.23678	0.397955	0.7572	1.607	0.317858	0.426365	0.677527	2.515	0.37317	0.644424	0.770148	1.808	0.284092	0.441336	0.727777
ILL.srfAD-BSU03520.1~729	1.662	0.249566	0.360788	0.702896	1.526	0.282506	0.358742	0.655643	1.458	0.237561	0.303761	0.653029	1.393	0.256624	0.32565	0.653675
ILL.yvgQ-BSU33430.1~1716	1.907	0.219613	0.367242	0.761174	1.612	0.262611	0.339484	0.662229	2.797	0.279577	0.469179	0.755107	2.406	0.259704	0.430227	0.754079
ILL.yvdC-BSU34650.10~330	2.034	0.233641	0.386234	0.751511	1.192	0.270235	0.315279	0.619923	1.406	0.297889	0.363958	0.638151	1.726	0.280105	0.385912	0.682913
ILL.yukJ-BSU31945.112~789	2.15	0.239145	0.368793	0.729669	1.499	0.338788	0.408301	0.634663	2.437	0.359726	0.537873	0.720809	1.744	0.301532	0.458213	0.728832
ILL.recF-BSU00040.1~1113	1.894	0.286468	0.374388	0.664364	1.854	0.360344	0.433406	0.630483	1.673	0.373713	0.446785	0.629803	2.218	0.352028	0.432009	0.639065
ILL.yodJ-BSU19620.83~904	2.23	0.308797	0.385235	0.639926	1.971	0.429817	0.499948	0.618177	3.376	0.503791	0.627016	0.640953	4.02	0.465931	0.656926	0.69041
ILL.yrrL-BSU27370.64~1146	1.911	0.24521	0.37527	0.726649	1.831	0.292921	0.389173	0.673027	2.177	0.30351	0.466772	0.729767	2.559	0.322232	0.508819	0.736293
ILL.ywtE-BSU35850.156~1016	1.874	0.279643	0.370036	0.671425	1.985	0.343793	0.437271	0.656865	2.298	0.365438	0.492935	0.678096	2.324	0.362882	0.492436	0.677718
ILL.purC-BSU06450.74~799	1.774	0.210152	0.370945	0.776729	1.814	0.315238	0.411321	0.658729	1.917	0.246717	0.390492	0.735322	1.547	0.210047	0.312144	0.712445
ILL.dusB-BSU00810.1~1002	1.719	0.314868	0.365278	0.611907	1.81	0.366198	0.414861	0.604478	2.084	0.46051	0.512262	0.598405	2.32	0.441652	0.487292	0.592403
ILL.yqfB-BSU25370.25~444	1.646	0.27159	0.362257	0.668994	1.799	0.319672	0.435091	0.680384	2.043	0.349103	0.461451	0.671108	2.294	0.348978	0.468551	0.674351
ILL.xkdJ-BSU12640.13~453	2.288	0.256088	0.387079	0.710814	3.793	0.584409	0.970992	0.759702	6.567	0.529884	1.0484	0.8104	2.535	0.321186	0.556882	0.772444
ILL.sigM-BSU09520.84~575	1.686	0.24199	0.367023	0.725117	1.749	0.262519	0.384882	0.710421	1.951	0.311796	0.492384	0.742703	1.994	0.285844	0.40714	0.701314
ILL.sdhC-BSU28450.44~652	1.844	0.306338	0.365019	0.620533	1.704	0.352912	0.413314	0.614474	2.587	0.467894	0.557907	0.62694	2.242	0.388525	0.487162	0.646942
ILL.ltaSA-BSU07260.276~2195	2.136	0.291809	0.364075	0.644068	1.665	0.312675	0.370749	0.625425	2.129	0.383723	0.435018	0.602239	2.101	0.356508	0.4159	0.614654
ILL.ylbH-BSU15010.200~754	1.726	0.290554	0.363997	0.645835	1.922	0.354997	0.444538	0.648861	2.247	0.37549	0.509227	0.682168	2.863	0.385421	0.558362	0.704735
ILL.ycsF-BSU04050.71~844	1.713	0.230825	0.36761	0.741275	1.52	0.306795	0.411826	0.679375	3.397	0.355215	0.619357	0.771692	3.531	0.319531	0.663933	0.820058
ILL.serC-BSU10020.147~1226	2.07	0.274832	0.383983	0.689544	1.992	0.357162	0.444678	0.645161	2.41	0.371651	0.53826	0.706667	2.895	0.41042	0.607441	0.716444
ILL.metN-BSU32730.14~838	1.521	0.311703	0.36528	0.621117	1.844	0.352091	0.43346	0.639232	1.818	0.409693	0.454644	0.592433	2.343	0.359653	0.456769	0.651402
ILL.yqzL-BSU25289.72~215	1.331	0.317809	0.358164	0.600964	1.819	0.457511	0.537232	0.623314	2.716	0.613681	0.713092	0.614342	2.285	0.546351	0.628995	0.611151
ILL.ycnE-BSU03870.8~295	1.493	0.223147	0.370422	0.759681	1.659	0.28838	0.367221	0.645846	1.797	0.28904	0.374178	0.659341	2.008	0.236473	0.372828	0.730444
ILL.yfjL-BSU08050.30~719	1.629	0.255936	0.366355	0.702558	2.044	0.36538	0.439521	0.63063	4.032	0.367864	0.640968	0.76955	3.716	0.374779	0.64213	0.765105
ILL.murD-BSU15200.1~1356	1.865	0.278636	0.366601	0.66507	1.592	0.301563	0.364264	0.633743	1.74	0.314952	0.379215	0.630737	2.068	0.342824	0.448302	0.66242
ILL.gmuF-BSU05870.1~948	1.845	0.230624	0.371005	0.746065	1.37	0.230687	0.312257	0.678945	1.941	0.262754	0.445677	0.767456	2.588	0.24581	0.440198	0.778485
ILL.nhaX-BSU09690.1~501	1.502	0.21735	0.363377	0.760588	0.696	0.228103	0.170179	0.421322	0.663	0.218046	0.163386	0.425511	0.964	0.200411	0.228373	0.605498
ILL.hisS-BSU27560.90~1364	1.637	0.285457	0.360586	0.649888	1.712	0.334245	0.391722	0.619191	1.924	0.332286	0.375346	0.601068	2.475	0.380436	0.450041	0.621466
ILL.ypuD-BSU23300.56~400	1.651	0.204862	0.375863	0.793386	1.494	0.221443	0.288819	0.663727	2.109	0.236049	0.365044	0.71756	1.063	0.168384	0.256855	0.730013
ILL.ytrE-BSU30420.1~696	1.809	0.223354	0.363003	0.748771	1.728	0.284759	0.358691	0.649902	2.915	0.419868	0.617594	0.711642	3.869	0.397693	0.721304	0.785226
ILL.yrrO-BSU27340.19~1287	1.612	0.308724	0.360763	0.618697	1.97	0.339555	0.400972	0.621873	2.109	0.332947	0.370973	0.598719	1.934	0.3443	0.388062	0.602422
ILL.ysmB-BSU28400.1~441	1.406	0.332428	0.369901	0.59947	1.811	0.346586	0.427381	0.639192	2.72	0.526266	0.65468	0.644617	2.152	0.469676	0.514174	0.58657
ILL.hemD-BSU12230.10~822	1.569	0.256046	0.361461	0.699155	1.291	0.281066	0.345013	0.642031	2.202	0.299472	0.429074	0.700049	1.621	0.29836	0.400705	0.676978
ILL.opuD-BSU30070.1~1539	1.937	0.257441	0.367319	0.70167	2.174	0.362757	0.442454	0.636181	2.797	0.359836	0.513677	0.700053	3.291	0.41023	0.610732	0.718185
ILL.comZ-BSU11310.15~206	2.077	0.180821	0.375742	0.828442	2.135	0.229725	0.432561	0.80163	2.651	0.212802	0.465454	0.843107	2.515	0.216751	0.441128	0.819384
ILL.ythQ-BSU30000.1~1158	1.878	0.211373	0.360199	0.767416	1.589	0.274914	0.368759	0.678516	2.777	0.316471	0.538478	0.7645	2.382	0.285963	0.482355	0.764288
ILL.yvyE-BSU35510.120~773	1.877	0.26405	0.366338	0.6893	1.379	0.221168	0.287824	0.660665	2.106	0.319738	0.441614	0.688168	1.872	0.264466	0.382059	0.701314
ILL.yrpD-BSU26820.26~733	1.805	0.242256	0.37732	0.735267	1.856	0.271584	0.38313	0.695772	1.896	0.263453	0.427588	0.750349	1.902	0.239278	0.387357	0.74821
ILL.hag-BSU35360.34~948	1.707	0.343331	0.367511	0.580621	3.085	0.532166	0.674266	0.646412	4.468	0.808615	0.973011	0.628658	3.947	0.716271	0.875469	0.636163
ILL.glmS-BSU01780.90~1892	1.856	0.296039	0.363232	0.636203	1.808	0.305851	0.365428	0.62475	1.661	0.326218	0.373566	0.608603	1.863	0.337337	0.371306	0.592798
ILL.yuzB-BSU32190.171~407	1.987	0.141495	0.372545	0.886315	1.075	0.145929	0.266087	0.788674	1.516	0.134354	0.289285	0.836215	1.548	0.138429	0.324731	0.860111
ILL.yuxG-BSU31220.16~2085	2.009	0.222067	0.380377	0.768167	1.542	0.242409	0.312918	0.65957	2.233	0.26443	0.424759	0.743589	2.728	0.22868	0.411566	0.783071
ILL.rbsD-BSU35930.1~396	1.701	0.273572	0.371104	0.672957	1.473	0.286462	0.354147	0.642445	1.8	0.332139	0.444125	0.674868	1.476	0.259817	0.320302	0.634218
ILL.yxeC-BSU39600.8~406	1.486	0.268402	0.35606	0.668655	2.142	0.439314	0.53474	0.638199	4.169	0.581491	0.871243	0.719021	2.819	0.536213	0.72332	0.680118
ILL.sunA-BSU21480.34~204	1.4	0.282494	0.365842	0.661571	1.052	0.277217	0.294401	0.578191	1.014	0.225988	0.2498	0.593818	0.634	0.163434	0.172763	0.575567
ILL.comEB-BSU25580.21~590	1.598	0.252509	0.366576	0.709468	1.869	0.365592	0.461019	0.650011	3.397	0.380921	0.580115	0.7189	2.41	0.310639	0.463545	0.713623
ILL.xerD-BSU23510.1~891	1.712	0.255949	0.368506	0.702012	1.848	0.322702	0.417071	0.662233	2.178	0.300073	0.437533	0.707432	2.362	0.294337	0.436349	0.712182
ILL.bcrC-BSU36530.15~596	1.48	0.254266	0.352375	0.691973	1.37	0.250909	0.331567	0.66945	1.907	0.383892	0.471053	0.640074	2.176	0.437881	0.564636	0.661607
ILL.ytqB-BSU30490.1~585	1.955	0.234912	0.386658	0.752909	2.151	0.286506	0.462815	0.748997	2.46	0.323784	0.542616	0.762885	3.171	0.358008	0.608762	0.765093
ILL.ypzK-BSU23240.35~409	1.815	0.299898	0.382794	0.650936	1.699	0.309741	0.368842	0.623406	2.309	0.435863	0.532783	0.631697	1.6	0.346152	0.398028	0.610589
ILL.aspA-BSU23570.45~1472	2.005	0.332208	0.376901	0.602395	2.22	0.392802	0.47051	0.627249	2.879	0.460481	0.535072	0.612904	3.499	0.539752	0.643193	0.621388
ILL.fdhD-BSU36710.20~808	1.512	0.278003	0.366266	0.668727	1.873	0.349907	0.427397	0.63803	2.604	0.415995	0.527749	0.650128	2.726	0.417266	0.61999	0.718399
ILL.sspE-BSU08660.4~258	2.296	0.233263	0.405403	0.766866	1.517	0.301617	0.417464	0.69364	2.059	0.267017	0.421414	0.737851	1.717	0.243846	0.370702	0.721592
ILL.yfmP-BSU07390.13~435	1.853	0.267308	0.374846	0.691471	1.369	0.278531	0.354833	0.657708	2.121	0.370194	0.485897	0.6648	1.77	0.30009	0.396554	0.668112
ILL.yunF-BSU32390.1~849	1.627	0.197668	0.359603	0.790488	1.691	0.265099	0.394754	0.718009	2.188	0.264317	0.457677	0.769809	2.314	0.229272	0.419135	0.786058
ILL.clsA-BSU36590.433~1881	2.302	0.193287	0.375865	0.808623	1.745	0.204251	0.35564	0.7747	2.146	0.216906	0.39247	0.78468	2.167	0.18626	0.346894	0.794504
ILL.yrkA-BSU26610.52~1356	2.058	0.267454	0.373371	0.688995	2.168	0.341984	0.453889	0.670925	3.067	0.413846	0.716848	0.772043	3.316	0.376325	0.690398	0.79066
ILL.uvrB-BSU35170.76~2061	1.933	0.264771	0.368381	0.688171	1.96	0.335156	0.412368	0.636369	2.584	0.354902	0.482536	0.676569	2.596	0.348319	0.500046	0.702008
ILL.yodB-BSU19540.82~420	1.611	0.249825	0.377894	0.724811	2.104	0.309478	0.410339	0.666025	2.968	0.297354	0.466131	0.729566	2.331	0.330376	0.525587	0.741291
ILL.mrpE-BSU31640.6~482	1.741	0.297553	0.386685	0.662114	1.801	0.359153	0.444874	0.64563	2.397	0.387456	0.554852	0.700641	3.07	0.397386	0.610564	0.728228
ILL.zur-BSU25100.5~442	1.999	0.247129	0.380039	0.724872	1.452	0.309687	0.364151	0.62248	1.509	0.307077	0.395136	0.662596	1.611	0.256159	0.362645	0.696493
ILL.yvqK-BSU33150.1~582	1.764	0.246312	0.386314	0.734193	1.238	0.2748	0.332009	0.635555	1.368	0.251441	0.344556	0.68516	1.851	0.254054	0.37337	0.709934
ILL.ykuC-BSU14030.1~1293	1.856	0.221878	0.37137	0.760853	1.837	0.292025	0.401423	0.683778	2.677	0.288221	0.50148	0.772169	3.008	0.284662	0.537609	0.798003
ILL.yybG-BSU40650.9~848	1.81	0.230274	0.374186	0.748895	1.373	0.272701	0.370475	0.681913	2.234	0.236443	0.387509	0.746235	1.867	0.260018	0.43708	0.762217
ILL.lmrA-BSU02680.19~585	1.512	0.270021	0.380833	0.699323	1.704	0.336425	0.440917	0.669066	2.402	0.433464	0.629538	0.706598	3.168	0.393875	0.728268	0.791059
ILL.dapG-BSU16760.92~1306	1.668	0.274497	0.357165	0.664222	1.696	0.309362	0.376815	0.636753	2.121	0.333571	0.427862	0.655434	2.018	0.331422	0.436526	0.66687
ILL.ygzD-BSU08899.18~218	1.312	0.227893	0.364159	0.741306	1.117	0.284223	0.338985	0.628404	1.386	0.265243	0.343874	0.659984	1.108	0.257408	0.325909	0.654923
ILL.glyA-BSU36900.16~1263	1.994	0.298128	0.360925	0.629689	1.693	0.325606	0.385362	0.622385	2.354	0.382992	0.432714	0.600298	1.609	0.331298	0.372215	0.602393
ILL.yxiE-BSU39250.103~549	1.559	0.300397	0.364899	0.635939	2.068	0.314469	0.399261	0.647296	1.774	0.4116	0.459043	0.600243	2.731	0.490731	0.644733	0.660137
ILL.sigD-BSU16470.1~765	2.057	0.256368	0.376978	0.711671	1.726	0.342123	0.442195	0.662991	3.498	0.357362	0.603886	0.760988	3.074	0.375193	0.655041	0.77556
ILL.yviA-BSU35480.98~943	1.729	0.236086	0.360803	0.724772	1.269	0.263798	0.336348	0.658382	2.15	0.299914	0.428593	0.699379	1.49	0.267461	0.369467	0.690993
ILL.spo0F-BSU37130.54~428	1.93	0.250592	0.391568	0.731377	1.993	0.282435	0.44089	0.73521	3.079	0.330696	0.606966	0.790445	4.028	0.365119	0.634773	0.767619
ILL.cstA-BSU28710.16~1812	1.872	0.242969	0.362678	0.717204	1.606	0.314243	0.386136	0.640454	3.136	0.402942	0.661909	0.753709	3.205	0.361355	0.606018	0.761017
ILL.ymaD-BSU17280.1~453	1.467	0.257328	0.359743	0.692128	1.858	0.305432	0.404055	0.670649	2.417	0.374555	0.535833	0.704173	2.889	0.322074	0.502612	0.731892
ILL.ycgO-BSU03220.10~1431	1.773	0.263407	0.370839	0.692415	1.71	0.289264	0.34379	0.624362	2.276	0.346952	0.462913	0.671257	2.057	0.394624	0.533475	0.68184
ILL.gspA-BSU38430.1~861	1.716	0.207532	0.375961	0.785531	0.813	0.249896	0.206186	0.467405	0.646	0.230685	0.169056	0.418005	0.921	0.223968	0.222451	0.54593
ILL.pbuE-BSU05800.55~1221	1.953	0.285203	0.365366	0.653205	1.681	0.293801	0.368389	0.644823	1.984	0.346762	0.439748	0.651193	2.659	0.409645	0.555324	0.682078
ILL.ypbH-BSU22970.5~589	1.779	0.276493	0.366659	0.671938	1.554	0.338503	0.390092	0.6153	2.368	0.378129	0.505453	0.671992	2.024	0.373969	0.461387	0.641138
ILL.swrC-BSU06710.1~3198	2.258	0.270907	0.372837	0.68279	2.367	0.348889	0.433525	0.644366	2.846	0.384625	0.521249	0.678997	2.981	0.397232	0.589068	0.714973
ILL.hfq-BSU17340.40~261	1.636	0.25715	0.370203	0.703175	1.42	0.370031	0.418319	0.60658	1.906	0.338787	0.457383	0.678474	1.457	0.300504	0.359545	0.628086
ILL.dctB-BSU04440.8~1060	2.307	0.210187	0.375848	0.780887	1.779	0.282962	0.401437	0.698503	2.033	0.234619	0.441471	0.798128	2.353	0.250076	0.435963	0.775397
ILL.pepF-BSU11540.47~2059	1.769	0.299579	0.36733	0.639795	1.861	0.369583	0.432577	0.620364	2.68	0.403058	0.54044	0.675073	2.658	0.401506	0.537487	0.674889
ILL.cspB-BSU09100.86~289	1.313	0.267957	0.346944	0.661265	1.437	0.337071	0.377912	0.603773	1.596	0.42078	0.445976	0.573227	1.897	0.427489	0.476587	0.59487
ILL.yisS-BSU10850.101~1129	2.761	0.2083	0.382248	0.787869	2.075	0.265724	0.364104	0.68073	2.4	0.249331	0.418902	0.758144	2.204	0.232131	0.384668	0.75598
ILL.ylmE-BSU15380.7~699	1.608	0.283897	0.367435	0.660328	1.479	0.294374	0.367914	0.647456	1.959	0.34332	0.41666	0.631106	1.876	0.35458	0.429393	0.628183
ILL.yodI-BSU19610.6~257	1.152	0.181363	0.342742	0.800798	0.599	0.138569	0.174494	0.65334	0.872	0.165402	0.228796	0.688588	0.875	0.150863	0.25194	0.763173
ILL.yorD-BSU20420.1~315	1.342	0.2748	0.360078	0.667424	1.54	0.333387	0.381629	0.610437	2.089	0.353006	0.494701	0.691368	1.426	0.2822	0.354166	0.647641
ILL.parE-BSU18090.287~2254	1.862	0.273741	0.365342	0.673584	1.911	0.334714	0.403347	0.631943	2.447	0.37033	0.490355	0.670601	2.392	0.350509	0.48837	0.691833
ILL.yczI-BSU04120.58~303	1.654	0.219198	0.358016	0.751442	1.198	0.209248	0.308942	0.712149	1.387	0.253025	0.358451	0.697291	1.36	0.25905	0.339407	0.664121
ILL.ytoI-BSU29270.16~1335	2.074	0.250091	0.379374	0.721566	2.11	0.302167	0.422439	0.691663	2.474	0.304113	0.484912	0.742063	3.062	0.313464	0.528022	0.758658
ILL.dfrA-BSU21810.1~507	1.644	0.283084	0.361664	0.65608	1.793	0.340473	0.407293	0.629714	2.007	0.365232	0.475881	0.663138	2.159	0.356768	0.475473	0.671292
ILL.yslB-BSU28460.13~459	1.532	0.270974	0.364226	0.672053	1.406	0.322162	0.382936	0.629196	1.397	0.309621	0.362962	0.620067	1.498	0.309332	0.377459	0.638047
ILL.ykgB-BSU13010.14~1063	1.55	0.291929	0.364253	0.646674	1.865	0.376466	0.470446	0.649204	2.27	0.388124	0.471463	0.631228	2.473	0.442876	0.563367	0.653413
ILL.yhbE-BSU08950.1~714	1.497	0.249308	0.362846	0.711196	1.176	0.290088	0.323853	0.600163	2.376	0.277282	0.438281	0.735718	1.881	0.260798	0.441961	0.765027
ILL.ipi-BSU11130.4~363	2.501	0.246414	0.409935	0.744284	1.383	0.282793	0.353238	0.646844	1.874	0.335776	0.461987	0.680981	1.707	0.256431	0.372686	0.706892
ILL.kbl-BSU17000.10~1188	2.138	0.267251	0.375338	0.691406	1.969	0.361414	0.449521	0.645992	3.286	0.393571	0.606556	0.72877	2.557	0.363231	0.541789	0.717438
ILL.yurQ-BSU32620.1~375	1.524	0.289486	0.362358	0.648292	1.803	0.36281	0.463558	0.653935	3.018	0.569815	0.761376	0.677242	2.648	0.528403	0.65331	0.641483
ILL.yfmT-BSU07350.8~1465	1.947	0.283165	0.362614	0.65278	2.906	0.522649	0.6106	0.619467	5.827	0.669572	1.05078	0.732479	4.04	0.588888	0.923893	0.738627
ILL.yktA-BSU14640.35~301	1.32	0.275106	0.357935	0.664376	1.703	0.316623	0.405706	0.656113	1.304	0.322848	0.351051	0.586964	1.42	0.332914	0.378308	0.601197
ILL.yocH-BSU19210.1~864	1.483	0.272628	0.365304	0.677745	1.846	0.375045	0.447451	0.629449	2.072	0.349588	0.446412	0.654798	1.549	0.28021	0.328876	0.619061
ILL.yktB-BSU14650.16~654	1.667	0.283873	0.364991	0.653832	1.933	0.324992	0.400707	0.64146	1.75	0.333259	0.407271	0.635019	1.768	0.344301	0.439386	0.656026
ILL.yojN-BSU19390.1~915	1.665	0.254325	0.368659	0.706947	1.433	0.309359	0.350209	0.605044	1.743	0.332832	0.452798	0.684118	1.431	0.238434	0.348089	0.710754
ILL.ytzJ-BSU29249.25~216	1.646	0.260936	0.384326	0.7122	1.755	0.314248	0.45135	0.705089	3.127	0.381073	0.598844	0.73028	3.002	0.396514	0.678125	0.762123
ILL.ypiB-BSU22580.1~540	1.663	0.302488	0.377203	0.647021	1.692	0.37645	0.443748	0.623253	2.444	0.397651	0.489594	0.634962	1.853	0.352829	0.430806	0.636141
ILL.yazB-BSU00800.1~210	1.597	0.27078	0.366574	0.676556	1.174	0.294459	0.33122	0.600242	1.956	0.345817	0.471921	0.683787	1.469	0.278771	0.355192	0.648835
ILL.prmA-BSU25450.25~960	2.238	0.261827	0.38269	0.702749	1.612	0.324413	0.396328	0.63677	2.032	0.343195	0.453064	0.66748	1.929	0.33818	0.412869	0.635203
ILL.lgt-BSU34990.14~823	2.073	0.304975	0.374743	0.633401	2.033	0.378402	0.445123	0.622577	2.639	0.519416	0.617643	0.623104	3.072	0.489823	0.615185	0.649786
ILL.yerI-BSU06640.102~1112	1.831	0.307353	0.376254	0.636959	1.679	0.380508	0.462961	0.640183	3.165	0.469241	0.692047	0.713977	2.088	0.395088	0.510672	0.660438
ILL.rplF-BSU01310.30~569	2.212	0.364408	0.376084	0.55376	1.371	0.307087	0.319138	0.564064	1.712	0.460875	0.424412	0.515978	1.638	0.426234	0.386579	0.507551
ILL.zwf-BSU23850.43~1512	1.644	0.314018	0.361245	0.611938	1.925	0.392613	0.467036	0.627053	2.276	0.45557	0.540383	0.625531	2.641	0.462524	0.560002	0.632036
ILL.prmC-BSU37000.1~867	1.661	0.274224	0.365805	0.67249	2.037	0.341917	0.415541	0.633163	3.04	0.372307	0.516978	0.68511	2.593	0.358054	0.517701	0.701534
ILL.ywqC-BSU36260.21~767	2.683	0.20585	0.382474	0.788691	1.857	0.226324	0.37192	0.753892	3.133	0.246739	0.431387	0.767554	2.578	0.214024	0.38781	0.785128
ILL.tcyA-BSU03610.1~807	1.94	0.291112	0.361348	0.641513	1.574	0.265436	0.325224	0.635232	1.944	0.383546	0.44982	0.621786	1.773	0.314943	0.398016	0.649756
ILL.yrhG-BSU27200.263~1063	1.81	0.250781	0.36082	0.702706	1.501	0.267636	0.330916	0.639089	2.519	0.397977	0.595553	0.722379	4.918	0.413239	0.814277	0.810227
ILL.yvrD-BSU33190.14~805	1.885	0.21749	0.380627	0.775286	1.321	0.239619	0.317239	0.669592	1.269	0.193621	0.278621	0.704474	1.646	0.21437	0.343641	0.745441
ILL.glcD-BSU28680.1~1413	1.744	0.261494	0.366541	0.692871	1.865	0.362269	0.415631	0.611535	3.232	0.380457	0.605707	0.740802	2.224	0.31867	0.488043	0.72618
ILL.yitS-BSU11110.30~881	1.69	0.253967	0.362944	0.694978	1.628	0.349641	0.441027	0.652951	3.302	0.440673	0.65673	0.7143	3.923	0.448982	0.789463	0.776576
ILL.yvcQ-BSU34710.1~1071	2.003	0.237542	0.374435	0.737086	1.771	0.282165	0.394998	0.694367	2.381	0.300431	0.500181	0.758118	2.441	0.296336	0.527735	0.78291
ILL.yneI-BSU17940.14~376	1.526	0.234534	0.366758	0.737936	1.625	0.270564	0.368435	0.680489	2.355	0.375858	0.600579	0.744356	2.791	0.324373	0.581531	0.783473
ILL.asnB-BSU30540.150~2048	2.082	0.29315	0.362016	0.638784	1.67	0.307895	0.374704	0.634114	2.293	0.36426	0.422977	0.614314	1.882	0.343403	0.373104	0.585921
ILL.pyrE-BSU15560.1~651	2.079	0.288945	0.375464	0.660401	2.083	0.370495	0.46974	0.647412	2.377	0.356571	0.456981	0.651081	2.697	0.524532	0.670035	0.658642
ILL.metP-BSU32740.1~669	2.07	0.27975	0.376155	0.67199	1.933	0.307338	0.363243	0.618493	2.419	0.34172	0.461512	0.671892	2.059	0.320551	0.441819	0.686369
ILL.uvrA-BSU35160.8~2881	1.741	0.268991	0.366475	0.681494	1.877	0.328227	0.409876	0.646496	2.649	0.325379	0.442692	0.680623	2.478	0.365608	0.521435	0.700559
ILL.fabD-BSU15900.1~954	1.48	0.307282	0.357801	0.61915	1.641	0.344497	0.399677	0.617922	2.218	0.43623	0.486365	0.598232	1.983	0.406445	0.473573	0.617716
ILL.yopR-BSU20790.24~1001	2.147	0.229626	0.377944	0.752479	1.573	0.273533	0.356875	0.663533	2.395	0.322527	0.54305	0.761841	2.041	0.259395	0.372308	0.702985
ILL.ylbP-BSU15100.7~489	1.745	0.236324	0.377858	0.742501	1.465	0.279689	0.387994	0.693202	2.263	0.259805	0.461733	0.779145	1.98	0.226611	0.40121	0.777277
ILL.yhdY-BSU09640.13~1128	2.281	0.196345	0.373395	0.801901	1.601	0.206553	0.321302	0.733647	2.121	0.222689	0.370567	0.75744	2.205	0.216869	0.373423	0.769302
ILL.ydeO-BSU05280.1~873	1.801	0.258	0.366837	0.700097	1.626	0.320147	0.387221	0.634215	2.455	0.353628	0.505073	0.696732	2.593	0.343237	0.529928	0.728407
ILL.kdgR-BSU22120.21~1040	1.73	0.205255	0.370652	0.78805	1.293	0.25365	0.337534	0.672015	2.042	0.229969	0.408879	0.780501	1.87	0.214092	0.355475	0.755802
ILL.yxiS-BSU39040.12~302	1.71	0.296123	0.389551	0.666397	1.589	0.370519	0.442847	0.629712	1.835	0.420929	0.490493	0.617517	1.909	0.331448	0.436772	0.664033
ILL.cdd-BSU25300.14~424	1.448	0.298473	0.367587	0.642555	1.963	0.390547	0.463128	0.621525	2.183	0.420788	0.49824	0.619292	2.039	0.385522	0.477797	0.643723
ILL.cysJ-BSU33440.19~1836	1.968	0.231473	0.373411	0.746596	1.516	0.264848	0.342639	0.660905	2.3	0.283839	0.436474	0.723165	2.913	0.263531	0.459803	0.769405
ILL.glnA-BSU17460.1~1335	1.575	0.315828	0.365103	0.612122	2.083	0.36261	0.443994	0.636991	2.121	0.425451	0.476089	0.595261	2.09	0.408667	0.444659	0.585281
ILL.yerC-BSU06580.1~315	2.425	0.173158	0.387642	0.845561	2.022	0.214866	0.386613	0.780694	2.832	0.253112	0.49563	0.806345	2.418	0.21651	0.453597	0.831498
ILL.ysgA-BSU28650.13~759	1.863	0.206392	0.372939	0.785539	1.594	0.238865	0.345817	0.706757	1.758	0.244287	0.397374	0.749224	2.262	0.227277	0.407417	0.78097
ILL.guaC-BSU32130.15~995	1.611	0.227045	0.373573	0.755205	1.728	0.270869	0.3726	0.685267	1.367	0.200735	0.287765	0.703086	1.187	0.192659	0.29086	0.725543
ILL.alaT-BSU31400.1~1161	1.885	0.266532	0.367688	0.686698	1.665	0.316251	0.394079	0.647894	2.363	0.343095	0.465678	0.677095	2.18	0.350234	0.480346	0.680916
ILL.dltB-BSU38510.1~1188	2.029	0.285784	0.370483	0.658611	1.643	0.31705	0.389378	0.641812	1.723	0.327327	0.378287	0.610952	2.184	0.371206	0.45069	0.62917
ILL.ylxP-BSU16640.1~279	1.673	0.261984	0.362119	0.672372	1.671	0.368397	0.451094	0.639876	1.672	0.33573	0.419719	0.645726	1.97	0.3685	0.466882	0.649576
ILL.ydjG-BSU06190.1~1026	1.773	0.269186	0.366118	0.679788	1.913	0.364044	0.423453	0.616755	2.84	0.424896	0.61801	0.708288	2.848	0.417661	0.603212	0.703414
ILL.hutP-BSU39340.1~456	1.739	0.237152	0.372105	0.737415	1.752	0.252241	0.347428	0.677268	3.577	0.420251	0.762906	0.785655	2.305	0.263094	0.482827	0.790979
ILL.yhdT-BSU09590.84~1469	1.803	0.259103	0.369016	0.700291	1.996	0.283069	0.41063	0.707353	2.751	0.291937	0.487256	0.757796	2.421	0.309155	0.509689	0.753371
ILL.ysxD-BSU28180.57~554	1.573	0.226747	0.357189	0.739367	1.787	0.276446	0.387401	0.692302	2.621	0.292225	0.495022	0.759663	2.17	0.257703	0.451877	0.775428
ILL.ywnC-BSU36610.22~405	1.802	0.307505	0.386681	0.643653	1.604	0.320739	0.394	0.641452	2.13	0.4	0.518722	0.661144	2.373	0.384883	0.537455	0.689923
ILL.yjhA-BSU12180.6~647	1.733	0.229655	0.375097	0.751531	0.472	0.10836	0.126503	0.620967	0.714	0.144186	0.174207	0.634468	0.587	0.100643	0.122622	0.632397
ILL.rapB-BSU36690.17~1150	1.822	0.270037	0.368772	0.682965	1.89	0.34056	0.413603	0.635309	4.15	0.435785	0.716275	0.752047	3.912	0.397414	0.629745	0.735634
ILL.rapC-BSU03770.3~1151	1.606	0.287775	0.369207	0.658812	1.865	0.328866	0.417005	0.651577	2.151	0.329114	0.456936	0.690852	2.189	0.325255	0.450233	0.685065
ILL.rluD-BSU15460.1~912	1.811	0.28869	0.355683	0.638086	1.844	0.331779	0.400173	0.632549	1.953	0.336758	0.410344	0.636288	2.291	0.394722	0.52436	0.672214
ILL.yoaG-BSU18590.80~484	1.869	0.191788	0.36062	0.80173	2.358	0.216634	0.404995	0.798664	3.578	0.293607	0.620802	0.835006	3.32	0.228905	0.528633	0.853403
ILL.ytxD-BSU29730.63~881	1.665	0.276005	0.375417	0.683459	1.999	0.333584	0.42109	0.64843	2.812	0.406903	0.589181	0.703715	2.511	0.335188	0.484625	0.702545
ILL.ycgE-BSU03080.38~502	1.798	0.254869	0.376248	0.714118	2.241	0.384114	0.499014	0.662221	2.606	0.42903	0.589282	0.684779	3.405	0.369895	0.685403	0.795601
ILL.msrA-BSU21690.19~552	1.441	0.286088	0.363861	0.656855	1.521	0.31944	0.372256	0.617655	2.286	0.346952	0.469494	0.672943	2.503	0.36704	0.531109	0.705024
ILL.dnaN-BSU00020.189~1325	1.732	0.25078	0.358102	0.702022	1.4	0.266638	0.325708	0.640591	1.11	0.215086	0.264086	0.640081	1.413	0.246592	0.305659	0.640926
ILL.cysL-BSU37650.147~1046	1.948	0.195922	0.376854	0.807177	1.582	0.24242	0.358278	0.713876	1.961	0.22796	0.422152	0.793957	2.269	0.222161	0.409837	0.789249
ILL.yajC-BSU27700.33~299	1.299	0.281687	0.367046	0.668288	1.895	0.3368	0.433816	0.653345	1.579	0.32235	0.379515	0.616344	1.752	0.399625	0.467172	0.619242
ILL.pnpA-BSU16690.173~2290	1.856	0.314403	0.365632	0.613189	2.361	0.387937	0.48412	0.642363	4.027	0.540587	0.634771	0.615598	3.397	0.524254	0.600337	0.606715
ILL.gpsA-BSU22830.1~1038	1.838	0.326968	0.369156	0.600537	2.029	0.376386	0.445631	0.622133	2.495	0.472059	0.570796	0.631073	2.413	0.443988	0.519447	0.616425
ILL.yydA-BSU40230.49~528	1.76	0.243152	0.370029	0.721701	1.521	0.267484	0.368914	0.687304	2.193	0.285201	0.456179	0.74306	2.091	0.276678	0.433819	0.730649
ILL.qcrA-BSU22560.1~504	1.796	0.265805	0.357368	0.67135	1.536	0.303127	0.360935	0.627296	2.743	0.374975	0.585925	0.731344	2.035	0.318097	0.449984	0.689258
ILL.yceK-BSU02970.1~303	1.436	0.218282	0.354247	0.753277	1.399	0.246403	0.336119	0.682793	1.288	0.244369	0.319414	0.666354	1.029	0.204718	0.285896	0.693468
ILL.ytjP-BSU29980.415~1806	1.874	0.279927	0.374472	0.671193	1.609	0.34927	0.419032	0.631564	2.475	0.394712	0.517278	0.665919	2.815	0.401078	0.585974	0.709068
ILL.fabHA-BSU11330.1~939	1.511	0.298154	0.370667	0.64482	1.529	0.319385	0.38185	0.63019	1.811	0.318615	0.388163	0.633047	2.029	0.386866	0.464555	0.628413
ILL.ycsN-BSU04150.82~984	2.034	0.280569	0.381578	0.678758	1.804	0.325508	0.412883	0.654844	2.162	0.324021	0.412694	0.654509	2.134	0.33384	0.45186	0.679788
ILL.yhaL-BSU09940.125~337	1.524	0.177468	0.360062	0.822362	1.14	0.155688	0.253113	0.747448	1.562	0.175383	0.316606	0.777493	1.339	0.167643	0.327434	0.810993
ILL.noc-BSU40990.6~857	1.633	0.297013	0.372625	0.647883	1.816	0.347341	0.430304	0.639401	1.991	0.374302	0.454976	0.633758	2.004	0.348268	0.426871	0.63623
ILL.prsW-BSU22940.120~776	1.547	0.251183	0.361516	0.705264	2.513	0.338035	0.501916	0.713881	4.761	0.471759	0.927315	0.809108	3.566	0.4101	0.663	0.746716
ILL.yoaF-BSU18580.1~294	1.472	0.249684	0.348572	0.686591	1.381	0.301523	0.370028	0.64146	2.753	0.507516	0.627962	0.642038	1.291	0.313084	0.345313	0.593204
ILL.csbA-BSU35180.17~247	1.484	0.153055	0.353587	0.859189	0.761	0.112789	0.181121	0.746051	0.87	0.14478	0.209642	0.70553	0.785	0.119578	0.189608	0.735969
ILL.hinT-BSU10030.23~460	1.783	0.290082	0.377972	0.659972	1.826	0.338754	0.414053	0.637089	2.011	0.389043	0.48683	0.638086	2.135	0.401789	0.469218	0.616761
ILL.qoxD-BSU38140.2~376	1.456	0.275476	0.369227	0.678005	1.974	0.343877	0.469316	0.685144	1.66	0.338588	0.415474	0.636643	1.603	0.341749	0.41359	0.631978
ILL.ypdA-BSU22950.109~1083	1.647	0.270693	0.360495	0.671217	1.763	0.351197	0.408135	0.618358	1.957	0.329268	0.419889	0.653787	1.98	0.381652	0.481374	0.651463
ILL.ypjD-BSU22500.90~425	1.549	0.319351	0.380116	0.627684	1.976	0.36854	0.428232	0.615448	2.766	0.540062	0.715208	0.67189	2.004	0.415071	0.464057	0.598135
ILL.yojF-BSU19470.1~351	1.428	0.286684	0.361001	0.649739	1.584	0.350973	0.418829	0.630767	1.855	0.325845	0.416713	0.653062	1.967	0.343561	0.479418	0.69505
ILL.moaD-BSU14310.1~234	1.621	0.24641	0.362765	0.712	1.046	0.299915	0.338102	0.606538	1.402	0.248786	0.334717	0.677629	1.891	0.313692	0.439985	0.693598
ILL.amyE-BSU03040.1~1980	1.734	0.265471	0.369311	0.689259	1.76	0.315287	0.403098	0.657193	3.24	0.388638	0.603315	0.730926	3.675	0.354522	0.566051	0.741411
ILL.yabN-BSU00580.1~1470	2.177	0.286281	0.368858	0.655735	2.097	0.369613	0.454357	0.638474	3.028	0.397414	0.535465	0.674934	2.846	0.39799	0.545281	0.684804
ILL.yqjL-BSU23830.15~776	1.657	0.233702	0.368865	0.740486	1.035	0.237278	0.289016	0.63949	1.607	0.27731	0.374866	0.679401	1.763	0.274943	0.407315	0.716619
ILL.gmuA-BSU05820.1~333	1.409	0.22039	0.362909	0.756565	1.109	0.248588	0.293963	0.62518	1.678	0.20009	0.338821	0.754213	1.628	0.205994	0.385661	0.797146
ILL.phrG-BSU40310.1~117	1.67	0.153472	0.357699	0.860424	1.051	0.150528	0.273266	0.789953	1.424	0.119509	0.275532	0.856292	1.289	0.143774	0.285399	0.816851
ILL.pabA-BSU00750.14~598	1.293	0.262493	0.362419	0.692136	1.433	0.312624	0.378357	0.634618	1.654	0.315821	0.419606	0.67393	2.154	0.342548	0.498965	0.708692
ILL.ykzW-BSU14629.38~157	1.295	0.188368	0.341245	0.788486	1.048	0.220015	0.277017	0.65167	1.241	0.361926	0.446158	0.638718	0.974	0.225162	0.299265	0.672816
ILL.yknW-BSU14340.12~707	1.535	0.282238	0.351452	0.643019	1.681	0.374347	0.418113	0.601019	2.132	0.3983	0.479536	0.631633	2.063	0.392443	0.469514	0.625539
ILL.dgcP-BSU29650.18~1757	1.968	0.209668	0.376743	0.782008	1.697	0.221203	0.341106	0.731661	1.944	0.229287	0.407238	0.778629	2.533	0.245919	0.456332	0.794876
ILL.yjqA-BSU12470.18~395	1.785	0.199395	0.375323	0.797713	1.423	0.226027	0.353368	0.734464	1.804	0.219651	0.403949	0.793115	1.968	0.231693	0.446412	0.808027
ILL.gatC-BSU06670.105~395	1.288	0.30782	0.35537	0.615277	1.813	0.368042	0.421717	0.608399	2.313	0.55673	0.588417	0.57506	2.352	0.436603	0.463199	0.572742
ILL.yqgU-BSU24820.1~1062	1.654	0.265689	0.366358	0.68776	1.84	0.345558	0.42988	0.647272	3.498	0.418403	0.62307	0.71233	2.687	0.39191	0.544844	0.688799
ILL.rplJ-BSU01040.66~566	1.646	0.320974	0.357175	0.595961	1.63	0.326618	0.377397	0.604786	1.885	0.413865	0.443744	0.578861	1.844	0.372724	0.390964	0.562967
ILL.ypkP-BSU21800.1~621	1.686	0.244372	0.369322	0.724958	2.087	0.321787	0.42154	0.663728	1.977	0.297747	0.402283	0.676819	2.136	0.317473	0.445598	0.691326
ILL.tagB-BSU35760.33~1178	1.575	0.255898	0.366634	0.706051	2.601	0.350644	0.487915	0.689475	4.12	0.39823	0.713822	0.779056	3.752	0.430309	0.74457	0.771048
ILL.yorB-BSU20440.16~312	1.462	0.328685	0.383593	0.619526	2.045	0.518021	0.598311	0.61697	3.542	0.694727	0.913558	0.66323	2.33	0.443671	0.523094	0.618532
ILL.trpA-BSU22630.1~804	1.962	0.223979	0.370904	0.755068	1.735	0.258663	0.40935	0.737431	3.028	0.329842	0.607291	0.792185	3.056	0.310913	0.583006	0.797666
ILL.bmrA-BSU34820.43~1812	1.964	0.260113	0.370072	0.697685	1.767	0.302199	0.38984	0.66037	2.747	0.378203	0.545038	0.703865	3.679	0.372904	0.600387	0.743822
ILL.yfjQ-BSU08000.3~962	1.757	0.222103	0.37423	0.758113	1.889	0.302949	0.402243	0.669992	2.034	0.31407	0.46277	0.710461	2.949	0.27978	0.48333	0.769836
ILL.yrrC-BSU27480.1~2397	1.599	0.270783	0.363019	0.676537	2.2	0.348823	0.439105	0.649083	2.433	0.40333	0.52392	0.663558	3.192	0.357852	0.51818	0.703854
ILL.ywaE-BSU38450.55~570	1.42	0.212828	0.355968	0.762486	1.816	0.216266	0.366645	0.762405	2.228	0.219943	0.453068	0.823907	1.55	0.231306	0.395602	0.771453
ILL.sirB-BSU15620.3~788	1.545	0.229142	0.362926	0.742899	1.121	0.211777	0.265412	0.649509	2.117	0.27635	0.414662	0.721105	1.422	0.228464	0.293646	0.655974
ILL.ymfM-BSU16910.893~1759	1.92	0.272431	0.365622	0.676518	1.882	0.337735	0.424313	0.648053	2.98	0.416421	0.576329	0.688278	2.489	0.359998	0.529401	0.712609
ILL.ccpN-BSU25250.133~771	1.802	0.296098	0.381807	0.657407	2.135	0.386523	0.494453	0.657753	3.52	0.445136	0.636762	0.699315	2.318	0.40558	0.565415	0.692434
ILL.ydgI-BSU05660.2~631	1.911	0.214017	0.363424	0.761912	1.271	0.262207	0.3256	0.646665	1.809	0.242253	0.352866	0.699914	2.243	0.267787	0.447576	0.760032
ILL.ytkD-BSU30630.20~496	1.929	0.24641	0.386545	0.735077	1.805	0.3271	0.454822	0.692611	2.998	0.424197	0.700424	0.752426	3.01	0.386937	0.642672	0.758467
ILL.yndB-BSU17730.23~457	1.385	0.282102	0.360426	0.656694	1.646	0.283469	0.355055	0.647182	2.082	0.335938	0.45267	0.677899	1.687	0.304934	0.395242	0.658791
ILL.proS-BSU16570.1~1695	1.538	0.311305	0.359769	0.612894	1.774	0.367271	0.422686	0.611768	2.47	0.459279	0.529611	0.611236	1.991	0.394108	0.440585	0.59899
ILL.cysS-BSU00940.1~1401	2.059	0.277565	0.373108	0.67474	1.65	0.333281	0.399824	0.632255	2.361	0.371479	0.495946	0.674557	2.018	0.330864	0.457189	0.688001
ILL.pbuO-BSU29990.14~1312	2.03	0.214401	0.381511	0.777924	1.524	0.24671	0.333196	0.680605	1.595	0.225298	0.338952	0.722329	2.248	0.259061	0.4037	0.733481
ILL.ywzC-BSU37610.56~280	1.795	0.273849	0.391713	0.697166	1.305	0.26417	0.341928	0.664257	1.682	0.296231	0.413886	0.695245	2.41	0.26191	0.434019	0.754047
ILL.ybaS-BSU01590.57~977	2.386	0.20262	0.382668	0.794842	1.854	0.233565	0.339511	0.702814	2.395	0.272388	0.479578	0.776162	2.232	0.238078	0.422431	0.778531
ILL.ydzM-BSU05099.145~321	1.583	0.151625	0.3528	0.859456	1.615	0.196551	0.38081	0.804789	2.126	0.160324	0.416576	0.881477	3.455	0.194213	0.547789	0.890031
ILL.yxjA-BSU39020.127~1320	1.636	0.255212	0.363296	0.700509	1.756	0.299332	0.384991	0.659711	1.677	0.272332	0.350753	0.658486	2.539	0.27007	0.392887	0.704331
ILL.yvgN-BSU33400.25~855	1.99	0.304341	0.357375	0.611978	1.961	0.418261	0.473473	0.601621	2.388	0.465664	0.502595	0.577968	2.824	0.479066	0.551674	0.607742
ILL.tagD-BSU35740.112~501	1.461	0.296692	0.357888	0.629954	1.936	0.349517	0.412613	0.61771	2.163	0.481274	0.538141	0.601012	1.832	0.371192	0.420568	0.602218
ILL.moaA-BSU36700.16~1041	2.192	0.285468	0.381499	0.669495	2.135	0.351558	0.453044	0.659062	2.408	0.401335	0.557806	0.689854	2.917	0.417359	0.616459	0.716149
ILL.ytrB-BSU30450.1~879	1.767	0.250961	0.367827	0.709091	1.828	0.284785	0.3619	0.654026	2.604	0.33067	0.559726	0.762113	2.131	0.328748	0.571591	0.776222
ILL.rplO-BSU01350.27~467	1.838	0.346274	0.370659	0.579941	1.869	0.335522	0.403356	0.613413	2.611	0.508655	0.537351	0.569023	1.858	0.447619	0.438749	0.540978
ILL.ypsC-BSU22170.98~1255	1.628	0.31	0.361811	0.614571	2.058	0.347692	0.431251	0.643605	2.231	0.395328	0.501492	0.64977	2.654	0.371815	0.483351	0.660893
ILL.ynbA-BSU17430.36~1298	1.917	0.282754	0.373351	0.669658	1.645	0.35411	0.417614	0.62403	2.48	0.396691	0.532098	0.674846	2.517	0.38347	0.590492	0.728971
ILL.purT-BSU02230.11~1165	1.548	0.275096	0.353747	0.660877	1.694	0.336611	0.401428	0.626446	2.264	0.410269	0.486058	0.623824	2.295	0.364322	0.491891	0.676777
ILL.luxS-BSU30670.7~480	1.603	0.301134	0.369544	0.640737	1.678	0.310668	0.375379	0.626238	2.056	0.374978	0.462227	0.643189	1.988	0.329427	0.394223	0.619231
ILL.yfhJ-BSU08560.1~270	1.661	0.223292	0.3722	0.761892	1.357	0.310299	0.380334	0.642828	1.63	0.329104	0.450012	0.686831	1.9	0.324806	0.445254	0.680976
ILL.moaB-BSU29460.85~597	1.389	0.249042	0.367196	0.71751	1.543	0.303753	0.41006	0.681448	3.32	0.362279	0.561232	0.72739	2.408	0.28699	0.45844	0.743212
ILL.ydiH-BSU05970.1~648	1.694	0.295572	0.362548	0.636081	2.083	0.376641	0.461235	0.63689	3.372	0.486271	0.684388	0.694587	3.661	0.507078	0.732339	0.703602
ILL.citZ-BSU29140.187~1305	1.859	0.298711	0.367039	0.639618	1.96	0.380241	0.447623	0.62285	2.717	0.47132	0.622202	0.668421	2.847	0.460262	0.610797	0.670794
ILL.murE-BSU15180.47~1531	1.58	0.308316	0.355099	0.611266	1.83	0.354566	0.406029	0.610361	2.812	0.389105	0.464296	0.622381	2.014	0.395852	0.466021	0.618304
ILL.bioYB-BSU32030.12~614	2.283	0.18365	0.378815	0.822796	1.304	0.195241	0.311038	0.739901	1.984	0.196047	0.335827	0.762861	1.863	0.192332	0.36485	0.80042
ILL.gltX-BSU00920.1~1452	1.756	0.329771	0.375113	0.606039	1.88	0.353631	0.416287	0.620924	2.436	0.467705	0.525194	0.599981	2.609	0.440734	0.481278	0.585395
ILL.yqgO-BSU24880.4~177	1.283	0.203291	0.361087	0.785064	1.69	0.284278	0.427466	0.721779	2.587	0.385987	0.587743	0.717502	1.777	0.246392	0.438108	0.774902
ILL.yneJ-BSU17950.4~495	1.498	0.268694	0.361915	0.680263	2.172	0.350806	0.488054	0.688614	2.37	0.341879	0.584032	0.766721	2.25	0.35632	0.520896	0.706105
ILL.gcp-BSU05940.1~1041	1.605	0.264244	0.370136	0.694227	1.444	0.299051	0.362792	0.63728	2.268	0.304959	0.443654	0.708917	1.737	0.278061	0.435696	0.740051
ILL.rlmB-BSU00960.1~750	1.702	0.273839	0.368308	0.676022	1.646	0.346113	0.442953	0.660343	2.85	0.37843	0.494124	0.659653	1.948	0.332546	0.451379	0.683015
ILL.yvrE-BSU33200.4~882	1.658	0.300895	0.374798	0.644357	2.072	0.409866	0.486323	0.625966	1.926	0.388984	0.489152	0.652031	2.547	0.41563	0.582075	0.694365
ILL.flhB-BSU16380.1~1083	1.585	0.270074	0.365363	0.680402	2.173	0.364042	0.492448	0.680649	4.102	0.445607	0.776217	0.773664	3.477	0.417668	0.725771	0.773444
ILL.rpsI-BSU01500.1~393	1.376	0.335604	0.358482	0.581974	1.835	0.355209	0.414569	0.614658	2.11	0.428481	0.456573	0.576003	1.574	0.412781	0.432876	0.572291
ILL.rpsR-BSU40890.1~240	1.45	0.362296	0.339931	0.51803	1.647	0.352878	0.37263	0.565458	1.853	0.418809	0.418538	0.54841	1.378	0.385939	0.376763	0.540389
ILL.ccpA-BSU29740.1~1005	2.461	0.298816	0.37258	0.635295	2.057	0.346635	0.412517	0.624888	2.407	0.421142	0.52984	0.645122	2.483	0.422637	0.518573	0.633824
ILL.ybxB-BSU01060.90~695	1.876	0.270024	0.37588	0.689521	1.989	0.282506	0.383839	0.67582	3.418	0.392328	0.582465	0.707504	2.248	0.336416	0.449001	0.673973
ILL.catE-BSU08240.18~875	1.788	0.222826	0.367311	0.754436	1.403	0.255076	0.332048	0.664656	2.387	0.262451	0.435027	0.751789	2.371	0.239089	0.462212	0.802025
ILL.era-BSU25290.1~906	2.092	0.307679	0.372706	0.626591	1.77	0.369343	0.437723	0.626647	2.187	0.449641	0.519443	0.613073	2.502	0.434952	0.506192	0.615056
ILL.mhqR-BSU13670.23~460	1.412	0.286714	0.353905	0.640467	1.554	0.313828	0.39192	0.649238	2.635	0.466311	0.623577	0.677718	2.066	0.360962	0.423538	0.614804
ILL.yqkA-BSU23670.1~1032	2.208	0.270766	0.378947	0.690529	1.896	0.363403	0.472223	0.663082	3.68	0.435376	0.785103	0.785432	2.661	0.32933	0.555804	0.764026
ILL.yqgS-BSU24840.1~1917	1.763	0.255755	0.3615	0.696605	1.905	0.305335	0.392648	0.660368	2.466	0.343238	0.532806	0.732949	2.669	0.336188	0.504852	0.721446
ILL.dltC-BSU38520.17~253	1.429	0.342343	0.38113	0.599936	2.098	0.376943	0.441327	0.606043	2.047	0.49159	0.523205	0.579993	1.989	0.462533	0.469443	0.55724
ILL.yhjA-BSU10440.39~308	1.975	0.278626	0.376229	0.675944	1.477	0.296227	0.37579	0.652068	1.683	0.333779	0.418454	0.644564	1.501	0.279957	0.322526	0.602577
ILL.ald-BSU31930.25~1161	1.841	0.324014	0.362363	0.597343	1.916	0.345752	0.418891	0.630672	2.278	0.426789	0.500152	0.619007	1.883	0.35126	0.399219	0.603777
ILL.lytF-BSU09370.49~1515	1.729	0.284842	0.368232	0.661979	2.624	0.473719	0.608218	0.66128	5.217	0.601183	1.05593	0.774734	5.766	0.546141	0.917488	0.757005
ILL.yqeB-BSU25740.12~734	1.847	0.197364	0.375373	0.80242	1.395	0.200663	0.313897	0.734403	1.553	0.201633	0.332604	0.755948	1.394	0.179611	0.274665	0.725469
ILL.ytxM-BSU30810.1~825	2.014	0.281014	0.367656	0.661394	2.093	0.302568	0.414812	0.680205	2.176	0.351101	0.498507	0.699632	2.575	0.387644	0.540065	0.689905
ILL.yhcI-BSU09090.1~942	1.656	0.250736	0.362991	0.707016	1.466	0.283022	0.34946	0.644737	2.264	0.323407	0.493631	0.726391	1.844	0.282327	0.428019	0.726107
ILL.cinA-BSU16930.1~1251	1.681	0.273135	0.36766	0.678562	1.677	0.342268	0.42005	0.641926	2.099	0.373619	0.470523	0.650794	2.778	0.36457	0.491981	0.67789
ILL.queC-BSU13720.130~789	2.332	0.247572	0.378615	0.721616	2.075	0.302829	0.421124	0.68817	2.176	0.318106	0.507428	0.742957	2.768	0.297035	0.469528	0.738637
ILL.yhaM-BSU09930.1~945	1.878	0.274328	0.379338	0.687119	1.693	0.3149	0.402028	0.658801	2.076	0.304891	0.400132	0.66045	2.231	0.284937	0.437304	0.728081
ILL.csoR-BSU33520.3~308	1.774	0.278864	0.388653	0.688177	1.899	0.284186	0.394672	0.682938	2.752	0.366271	0.553332	0.723831	3.108	0.332989	0.538581	0.744112
ILL.yczH-BSU04020.7~615	2.105	0.220155	0.393992	0.781048	2.682	0.322873	0.546686	0.761367	3.603	0.379247	0.746213	0.812769	3.773	0.28401	0.634598	0.843491
ILL.yccF-BSU02720.127~1203	1.7	0.297657	0.370181	0.645129	1.904	0.330053	0.426002	0.658501	2.779	0.399636	0.524177	0.666633	2.74	0.390474	0.508641	0.659889
ILL.gcvPB-BSU24550.1~1467	1.657	0.216828	0.361752	0.760646	1.497	0.278713	0.378132	0.682649	3.789	0.317185	0.594233	0.793667	2.357	0.266527	0.455085	0.766521
ILL.yvaE-BSU33570.1~360	1.483	0.209479	0.365467	0.777238	0.879	0.204581	0.247056	0.636393	0.848	0.181923	0.22103	0.634315	1.683	0.273701	0.433042	0.741123
ILL.ytsP-BSU29640.170~661	1.616	0.281967	0.375112	0.673903	1.58	0.270114	0.367324	0.680616	2.382	0.368676	0.524388	0.7008	2.029	0.345333	0.467268	0.680817
ILL.ftsW-BSU14850.29~1240	1.672	0.263168	0.368866	0.693946	2.109	0.325399	0.415552	0.650063	2.631	0.342775	0.494365	0.70425	2.489	0.336312	0.522925	0.73194
ILL.yclP-BSU03820.1~759	1.564	0.318977	0.360557	0.603488	2.139	0.371372	0.452688	0.63409	1.941	0.476296	0.525888	0.596331	2.279	0.487995	0.583535	0.629223
ILL.ybcM-BSU01900.1~315	2.415	0.149685	0.3969	0.884464	2.73	0.180295	0.463157	0.876747	1.834	0.123568	0.3682	0.90887	1.981	0.145973	0.356129	0.867657
ILL.sucC-BSU16090.2~1159	1.625	0.352617	0.365245	0.56582	2.333	0.435608	0.485254	0.596671	2.92	0.556473	0.562896	0.553774	2.718	0.535821	0.533891	0.546816
ILL.ykoY-BSU13440.1~975	2.657	0.230821	0.384256	0.752991	3.734	0.356524	0.505172	0.691682	7	0.457423	0.914708	0.804596	7	0.390213	0.917341	0.845741
ILL.ylxM-BSU15970.49~381	1.614	0.280481	0.355271	0.647049	1.365	0.302612	0.365571	0.631746	1.978	0.358978	0.441273	0.639747	1.542	0.309246	0.359048	0.614877
ILL.yvbI-BSU33870.28~726	1.931	0.265435	0.377044	0.698881	1.849	0.348388	0.471593	0.681088	1.929	0.303571	0.461869	0.727072	2.991	0.397238	0.647344	0.747989
ILL.rpe-BSU15790.5~658	1.484	0.263621	0.358265	0.682422	1.525	0.320885	0.36572	0.607888	1.559	0.287427	0.350653	0.63666	1.923	0.29001	0.393996	0.682278
ILL.thiE-BSU38290.1~669	1.738	0.258482	0.377841	0.707741	1.574	0.301652	0.395358	0.668139	2.259	0.337052	0.485069	0.702233	2.59	0.299361	0.499415	0.758137
ILL.yueE-BSU31830.7~537	1.719	0.199763	0.370364	0.795001	1.074	0.196661	0.279814	0.69929	1.288	0.205689	0.286282	0.691286	1.427	0.199739	0.298179	0.713862
ILL.tmk-BSU00280.1~639	1.751	0.240101	0.37438	0.734961	1.508	0.307075	0.401792	0.667881	2.113	0.333495	0.471853	0.69604	2.492	0.305117	0.469437	0.72443
ILL.ydjP-BSU06280.13~828	1.954	0.246026	0.377271	0.726697	1.646	0.272909	0.343961	0.649502	1.831	0.286907	0.421577	0.715734	2.144	0.315061	0.500869	0.743385
ILL.ykuS-BSU14200.1~246	1.567	0.258269	0.364273	0.695691	1.194	0.279109	0.329957	0.627109	1.939	0.356521	0.502431	0.689107	1.564	0.255311	0.34829	0.675299
ILL.cueR-BSU09560.3~434	1.788	0.251655	0.367257	0.705161	1.639	0.309487	0.398629	0.65945	1.922	0.280237	0.395578	0.691959	2	0.298733	0.42045	0.694386
ILL.purD-BSU06530.1~1269	1.99	0.222162	0.385763	0.771091	1.898	0.271826	0.403709	0.715659	1.438	0.244176	0.356935	0.712037	1.807	0.214807	0.350071	0.750847
ILL.dinG-BSU22400.126~2921	1.766	0.269102	0.371969	0.685814	2.013	0.305601	0.382716	0.64742	2.275	0.335569	0.470934	0.693301	2.383	0.334669	0.469141	0.692672
ILL.sdpR-BSU33790.39~311	1.451	0.222667	0.36482	0.754665	1.398	0.219713	0.344625	0.739925	1.52	0.237467	0.38942	0.750421	1.474	0.182307	0.322452	0.776966
ILL.dltE-BSU38540.1~759	1.752	0.291849	0.356872	0.631927	1.55	0.259308	0.328374	0.648351	1.281	0.277769	0.32858	0.62344	1.673	0.312114	0.364204	0.617309
ILL.ydcI-BSU04780.19~2178	2.141	0.275229	0.370153	0.672658	2.032	0.354358	0.431577	0.636539	2.316	0.377877	0.48749	0.659081	2.511	0.351435	0.527851	0.721044
ILL.ytmP-BSU29920.258~872	1.716	0.279703	0.364791	0.662735	2.163	0.361708	0.461238	0.652569	4.465	0.513584	0.726856	0.697393	4.51	0.461048	0.719113	0.728231
ILL.ywnA-BSU36630.40~441	1.631	0.235915	0.363565	0.731135	1.323	0.258576	0.338952	0.670483	1.324	0.261576	0.339416	0.662859	1.356	0.253009	0.356876	0.696487
ILL.copB-BSU33490.87~2186	2.073	0.242341	0.372073	0.726188	1.348	0.290196	0.311146	0.578707	1.304	0.198099	0.266658	0.676077	1.22	0.172858	0.244335	0.696366
ILL.xpt-BSU22070.89~673	1.674	0.228125	0.363504	0.742936	1.904	0.336757	0.450108	0.672491	2.34	0.31351	0.517527	0.756432	2.413	0.302956	0.462548	0.725248
ILL.guaA-BSU06360.96~1637	1.863	0.309578	0.362712	0.612787	2.114	0.366492	0.437731	0.627572	2.164	0.410295	0.472681	0.609743	2.408	0.400978	0.467075	0.61175
ILL.ytpQ-BSU29830.1~810	1.743	0.282248	0.358679	0.649245	1.766	0.316058	0.390598	0.639534	2.149	0.406662	0.487623	0.626999	2.626	0.389345	0.483478	0.641125
ILL.thiS-BSU11680.1~201	1.462	0.292394	0.339769	0.607061	1.342	0.369755	0.413819	0.599258	2.797	0.419117	0.726418	0.7719	1.907	0.413915	0.53051	0.656543
ILL.htrA-BSU12900.42~1391	2.264	0.224701	0.378469	0.760476	1.651	0.286718	0.38023	0.671976	2.965	0.277528	0.463012	0.755258	1.832	0.249207	0.39209	0.73851
ILL.rsbV-BSU04710.62~391	1.918	0.30652	0.385434	0.647912	1.181	0.336246	0.375398	0.602474	1.066	0.261765	0.298273	0.608354	1.518	0.313989	0.379476	0.63352
ILL.yxiK-BSU39140.1~462	1.698	0.280991	0.374915	0.67601	1.528	0.308742	0.387756	0.652801	1.884	0.292862	0.410155	0.692683	1.46	0.302442	0.402529	0.67217
ILL.sodA-BSU25020.4~612	1.716	0.301526	0.357499	0.622152	1.944	0.329483	0.410366	0.637904	1.724	0.394559	0.438876	0.595351	1.932	0.378784	0.395303	0.560669
ILL.rnpA-BSU41050.152~502	1.65	0.291298	0.370861	0.65485	1.823	0.311484	0.40632	0.661631	2.423	0.383907	0.49881	0.660741	2.581	0.40668	0.498664	0.6345
ILL.ndh-BSU12290.39~1217	1.845	0.311162	0.369405	0.6235	1.722	0.336438	0.396947	0.622331	1.935	0.347364	0.395668	0.606002	1.881	0.369954	0.429057	0.611495
ILL.ywdI-BSU37950.38~394	1.608	0.282025	0.357302	0.646667	1.642	0.31667	0.364309	0.613324	3.461	0.486071	0.641281	0.666834	2.424	0.515731	0.602057	0.616512
ILL.ykuK-BSU14110.1~519	1.763	0.30281	0.377271	0.644898	2.103	0.353988	0.468928	0.670005	2.446	0.479684	0.607961	0.649678	2.648	0.471798	0.566498	0.623673
ILL.leuS-BSU30320.110~2524	1.9	0.309046	0.37087	0.625228	1.709	0.33889	0.388794	0.610742	1.804	0.337736	0.406252	0.630576	2.487	0.362612	0.435051	0.62878
ILL.yopS-BSU20780.29~253	1.709	0.240066	0.370314	0.730889	1.504	0.306287	0.421385	0.688716	2.781	0.402811	0.586065	0.705796	1.466	0.261066	0.371739	0.70106
ILL.lonA-BSU28200.88~2412	2.005	0.301368	0.373037	0.639884	1.977	0.382158	0.451446	0.624704	2.975	0.448239	0.555399	0.642201	2.969	0.420219	0.562291	0.673976
ILL.yabC-BSU00360.1~879	1.543	0.271322	0.366144	0.678139	1.927	0.309118	0.385232	0.645215	1.948	0.357746	0.445723	0.647279	1.68	0.256875	0.348725	0.680699
ILL.ycnD-BSU03860.17~766	1.821	0.226062	0.382924	0.764818	1.245	0.227818	0.309978	0.684601	1.82	0.222434	0.337469	0.724468	1.661	0.230204	0.353659	0.728794
ILL.ribE-BSU23270.11~658	1.929	0.279905	0.382571	0.676009	1.521	0.245807	0.298424	0.627668	1.9	0.320601	0.43073	0.677502	1.698	0.249939	0.328952	0.666064
ILL.ribD-BSU23280.130~1215	1.828	0.253653	0.370098	0.707507	1.405	0.223185	0.285509	0.654407	1.641	0.277172	0.354259	0.655864	1.346	0.227831	0.30819	0.678265
ILL.yvzF-BSU33049.1~186	2.014	0.251625	0.378434	0.713086	1.328	0.323884	0.400627	0.646429	1.639	0.255527	0.338703	0.662293	1.837	0.344018	0.486462	0.693998
ILL.pyrF-BSU15550.1~720	1.654	0.313115	0.365287	0.618431	2.233	0.388025	0.497042	0.656705	1.725	0.339667	0.406177	0.628174	2.901	0.516426	0.672971	0.665557
ILL.yurT-BSU32660.11~394	1.737	0.228473	0.371042	0.747767	1.408	0.252414	0.344011	0.684572	1.27	0.276074	0.354093	0.660837	1.297	0.219961	0.306751	0.693632
ILL.yvhJ-BSU35520.1~1176	1.989	0.287986	0.373786	0.660893	2.033	0.362343	0.423868	0.615591	2.233	0.386486	0.463883	0.629097	2.202	0.34998	0.452165	0.65926
ILL.ywqH-BSU36210.74~496	1.731	0.234804	0.384002	0.7515	0.701	0.148677	0.172697	0.615965	0.984	0.181688	0.238988	0.667033	0.707	0.133842	0.157773	0.621797
ILL.ymdA-BSU16960.114~1676	1.813	0.319459	0.370583	0.614228	2.353	0.359954	0.441442	0.633846	2.401	0.434353	0.515779	0.623042	2.227	0.393469	0.45597	0.611407
ILL.odhB-BSU19360.16~1269	1.587	0.35141	0.367438	0.570517	2.483	0.387387	0.44316	0.605743	3.016	0.537155	0.548351	0.556105	2.241	0.45583	0.458472	0.550475
ILL.rpmH-BSU41060.100~234	1.402	0.305746	0.36044	0.621769	1.643	0.314115	0.381313	0.62499	1.414	0.356426	0.389031	0.591169	1.518	0.338475	0.385087	0.606372
ILL.sigW-BSU01730.50~613	1.88	0.345345	0.366195	0.57333	2.004	0.380882	0.464896	0.630422	2.43	0.527635	0.576241	0.586279	2.436	0.465237	0.504023	0.580436
ILL.yjpA-BSU12450.9~266	1.548	0.206625	0.364395	0.77465	1.363	0.297542	0.384409	0.664254	2.43	0.3564	0.574494	0.746122	1.747	0.28365	0.430938	0.722486
ILL.yqkF-BSU23620.14~934	1.667	0.247176	0.366421	0.71608	1.746	0.30364	0.398203	0.666461	1.77	0.2894	0.398816	0.689824	2.47	0.303634	0.477	0.736066
ILL.ytpP-BSU29840.117~440	1.527	0.292119	0.356912	0.637315	1.446	0.365234	0.407357	0.601099	2.699	0.48394	0.613878	0.65303	2.267	0.413096	0.540274	0.659761
ILL.rpmG-BSU24900.23~172	1.362	0.359367	0.365321	0.559393	1.399	0.32562	0.358008	0.581911	1.142	0.364608	0.347046	0.532272	1.488	0.376987	0.377332	0.539634
ILL.ypiP-BSU21850.42~815	2.085	0.265109	0.373898	0.69293	1.88	0.355381	0.46133	0.662369	3.362	0.411473	0.6201	0.716051	3.663	0.407718	0.683077	0.758688
ILL.yjbB-BSU11480.1~1218	2.057	0.123699	0.373782	0.910089	2.655	0.12273	0.341347	0.889033	4.762	0.101941	0.447924	0.951064	4.06	0.0954843	0.382161	0.94318
ILL.thiN-BSU15800.73~717	1.928	0.252713	0.374849	0.714525	1.543	0.311473	0.388357	0.646297	2.391	0.338522	0.489566	0.705931	2.408	0.330693	0.493207	0.71638
ILL.thyA-BSU17680.832~1671	1.976	0.224476	0.378097	0.761245	1.751	0.252351	0.385963	0.726036	3.232	0.281484	0.571094	0.818408	2.654	0.264404	0.503145	0.801988
ILL.yphP-BSU21860.23~457	1.315	0.318157	0.363231	0.611934	1.679	0.380631	0.417473	0.59318	1.954	0.442461	0.488338	0.593663	2.022	0.425714	0.493266	0.611639
ILL.yopQ-BSU20800.1~1383	2.024	0.232816	0.370411	0.742569	1.965	0.305834	0.412569	0.677168	3.408	0.320784	0.610807	0.801312	2.2	0.280744	0.442887	0.737996
ILL.argS-BSU37330.1~1671	2.043	0.296783	0.377987	0.65016	2.069	0.318132	0.378751	0.623443	2.212	0.371815	0.455218	0.635224	2.411	0.395501	0.489751	0.642906
ILL.yonU-BSU20990.2~190	1.86	0.288522	0.393805	0.677239	1.414	0.304327	0.379623	0.645399	2.742	0.431274	0.647992	0.715187	1.825	0.303522	0.423005	0.688737
ILL.pdhC-BSU14600.18~1346	1.538	0.303864	0.351086	0.6131	1.671	0.299916	0.35395	0.617189	1.638	0.371461	0.394168	0.57903	1.706	0.362076	0.38003	0.572753
ILL.rpsQ-BSU01250.23~286	1.427	0.318458	0.357769	0.594124	1.511	0.337687	0.406896	0.626036	2.407	0.460229	0.499682	0.577768	1.378	0.354528	0.377272	0.578539
ILL.kipR-BSU04100.16~768	1.728	0.219938	0.371531	0.763128	2.477	0.328082	0.489954	0.716792	3.157	0.391201	0.683518	0.770766	2.9	0.282719	0.514392	0.784274
ILL.thyA-BSU21820.84~878	1.921	0.213358	0.368978	0.770412	1.539	0.278842	0.398278	0.700774	1.715	0.258479	0.405206	0.739373	2.65	0.281012	0.497611	0.773776
ILL.gid-BSU16130.75~1382	1.596	0.296439	0.367144	0.643003	1.78	0.371709	0.430523	0.616504	2.168	0.389252	0.49021	0.649472	2.584	0.41114	0.570759	0.69109
ILL.sacA-BSU38040.1~1440	1.882	0.243768	0.373954	0.722521	1.777	0.27589	0.347571	0.649279	2.636	0.29336	0.491856	0.759193	1.97	0.258501	0.420504	0.748181
ILL.mrpC-BSU31620.1~342	1.794	0.27093	0.39132	0.700315	1.465	0.308608	0.401339	0.664993	2.428	0.469371	0.613545	0.666193	2.349	0.368979	0.474141	0.655276
ILL.phrC-BSU03780.1~123	1.365	0.217958	0.37063	0.767345	1.006	0.205771	0.262082	0.650136	1.383	0.357917	0.400315	0.595654	0.867	0.241813	0.258674	0.583432
ILL.ypsA-BSU22190.1~630	1.799	0.258921	0.367676	0.699401	1.69	0.332093	0.409737	0.639722	2.085	0.348571	0.454734	0.66575	1.864	0.312291	0.404187	0.659797
ILL.yvbK-BSU33890.42~509	1.399	0.273957	0.36837	0.678446	1.695	0.369043	0.427968	0.616685	2.299	0.352154	0.511407	0.707328	2.217	0.391798	0.551199	0.694064
ILL.ydjH-BSU06200.1~765	1.824	0.264134	0.353261	0.669172	1.551	0.301982	0.349983	0.613751	2.963	0.401504	0.620877	0.729475	3.668	0.369706	0.619911	0.750762
ILL.yxaL-BSU39940.1~1233	1.743	0.270374	0.373556	0.685572	1.931	0.37042	0.447242	0.633109	4.023	0.448412	0.762352	0.763098	3.242	0.404166	0.684492	0.76377
ILL.cmk-BSU22890.1~675	1.894	0.295601	0.367527	0.643007	2.08	0.342728	0.439739	0.658033	2.724	0.474284	0.624445	0.667285	2.691	0.405117	0.524005	0.659081
ILL.yocD-BSU19170.6~983	2.108	0.257769	0.371405	0.701945	1.853	0.316694	0.420304	0.670099	3.919	0.440984	0.799278	0.784716	3.177	0.408684	0.681692	0.758544
ILL.yqjZ-BSU23680.10~354	1.777	0.218321	0.369777	0.764299	1.748	0.277697	0.378147	0.675279	2.289	0.300164	0.532559	0.781174	2.278	0.315921	0.549959	0.773575
ILL.ypwA-BSU22080.17~1522	2.092	0.296344	0.374047	0.649458	2.335	0.383205	0.479856	0.647042	3.235	0.503354	0.705443	0.694181	3.597	0.445327	0.630547	0.693859
ILL.mobA-BSU14260.528~1127	1.822	0.223211	0.374813	0.761806	1.576	0.270672	0.380278	0.69551	2.44	0.267144	0.49355	0.792841	2.771	0.277014	0.544677	0.812434
ILL.pbpB-BSU15160.1~2151	2.655	0.282048	0.371943	0.664104	1.938	0.349936	0.436647	0.646966	3.607	0.377991	0.480938	0.650639	2.481	0.371285	0.495456	0.672799
ILL.lytB-BSU35630.24~2141	1.678	0.285919	0.360196	0.648872	2.278	0.402717	0.517257	0.658973	4.593	0.556747	0.916256	0.75334	3.463	0.465614	0.721752	0.731982
ILL.ftsH-BSU00690.1~1914	1.926	0.301944	0.365396	0.627089	2.086	0.350586	0.432379	0.635761	2.253	0.425498	0.483937	0.606177	2.486	0.44269	0.501314	0.603336
ILL.tdh-BSU16990.72~1115	1.488	0.277907	0.358517	0.660164	1.598	0.328766	0.392698	0.627878	2.61	0.41815	0.569923	0.681567	2.443	0.339977	0.474838	0.690834
ILL.ytxB-BSU28970.34~675	1.83	0.222985	0.374457	0.760384	1.602	0.292041	0.404587	0.691276	2.089	0.308241	0.462157	0.716131	1.872	0.271178	0.476434	0.777734
ILL.queA-BSU27720.1~1029	1.767	0.307836	0.362297	0.61793	1.756	0.361914	0.428122	0.623993	2.094	0.396868	0.47017	0.623729	1.921	0.41674	0.459653	0.595257
ILL.hslU-BSU16160.3~1406	2.086	0.303702	0.363652	0.625798	1.867	0.366113	0.423377	0.616482	2.568	0.457154	0.53315	0.616719	2.695	0.444658	0.516472	0.615183
ILL.glmU-BSU00500.30~1400	1.898	0.31399	0.36141	0.606611	1.874	0.332927	0.389206	0.617588	2.408	0.447065	0.50253	0.602365	1.962	0.391489	0.407005	0.566158
ILL.parB-BSU40960.1~849	2.42	0.217003	0.376827	0.771363	2.671	0.273456	0.478578	0.772756	3.05	0.357465	0.651103	0.790434	2.591	0.284179	0.480639	0.762103
ILL.ydgE-BSU05600.63~536	2.66	0.181583	0.3811	0.828474	1.814	0.21733	0.373565	0.76981	3.226	0.27936	0.559184	0.81381	2.283	0.220119	0.458281	0.829092
ILL.yybT-BSU40510.1~1980	2.547	0.273026	0.373358	0.677757	1.795	0.302306	0.388295	0.658415	3.267	0.37944	0.532005	0.68926	3.169	0.363431	0.546173	0.719112
ILL.rbfA-BSU16650.17~370	1.963	0.293966	0.38004	0.656136	1.753	0.292848	0.395416	0.6757	2.02	0.404051	0.470988	0.611784	1.702	0.372882	0.447188	0.630433
ILL.patA-BSU14000.202~1383	1.779	0.260378	0.375087	0.704075	2.031	0.314468	0.412266	0.667827	2.617	0.327931	0.472097	0.700441	2.032	0.329984	0.456314	0.688105
ILL.rseP-BSU16560.1~1269	1.63	0.297643	0.357101	0.628729	1.671	0.3224	0.379931	0.620981	1.928	0.35582	0.417189	0.618966	2.459	0.397145	0.471366	0.625254
ILL.yhgE-BSU10160.1~2328	1.789	0.248156	0.375083	0.722714	1.826	0.26763	0.357224	0.675059	2.102	0.284579	0.430499	0.723131	3.565	0.304328	0.53035	0.771863
ILL.rpsG-BSU01110.10~480	1.424	0.334819	0.364093	0.588687	1.849	0.353896	0.404762	0.603639	2.117	0.484359	0.501179	0.566894	2.13	0.384937	0.424027	0.585883
ILL.pdhB-BSU14590.1~978	1.883	0.316356	0.372961	0.615592	1.805	0.30646	0.378923	0.640549	1.678	0.373158	0.384926	0.563604	1.925	0.387741	0.409823	0.57154
ILL.yfhQ-BSU08630.66~1175	1.649	0.265756	0.367541	0.687599	1.738	0.27322	0.363277	0.672551	2.337	0.316536	0.479674	0.725019	2.579	0.312181	0.498423	0.741555
ILL.ywqG-BSU36220.97~882	1.692	0.218247	0.368729	0.763507	1.508	0.232555	0.331591	0.702316	1.981	0.221757	0.369365	0.756135	1.423	0.187775	0.3218	0.768059
ILL.yfnA-BSU07340.43~1428	1.818	0.251596	0.368361	0.711038	1.706	0.28729	0.378585	0.669174	2.576	0.331963	0.509181	0.727427	2.978	0.315532	0.596611	0.801751
ILL.nagBB-BSU02360.56~805	1.884	0.280787	0.376946	0.673685	2.032	0.324191	0.418391	0.659043	2.862	0.389341	0.517918	0.673125	2.56	0.358066	0.545667	0.7244
ILL.divIC-BSU00620.18~395	1.616	0.370033	0.371073	0.551173	2.262	0.471261	0.518862	0.591473	2.782	0.660452	0.648788	0.539843	2.701	0.567726	0.583626	0.560844
ILL.grpE-BSU25480.1~564	1.327	0.292226	0.353348	0.632312	1.385	0.303862	0.372126	0.641448	1.75	0.387324	0.429047	0.59734	1.855	0.341582	0.375815	0.587717
ILL.yvzJ-BSU34729.10~219	1.436	0.200204	0.379283	0.802744	2.08	0.2495	0.452922	0.786849	2.185	0.242296	0.507355	0.829513	1.685	0.200269	0.315496	0.732182
ILL.yrzH-BSU27800.125~256	1.459	0.211978	0.359062	0.763603	1.221	0.240662	0.319148	0.671579	1.589	0.227191	0.39821	0.777436	0.907	0.159765	0.247048	0.732983
ILL.ydaG-BSU04220.1~423	1.67	0.214264	0.364979	0.768079	1.213	0.274225	0.320719	0.622302	1.094	0.2837	0.32153	0.610041	1.246	0.256584	0.330064	0.661438
ILL.yojG-BSU19460.1~666	1.869	0.308037	0.375332	0.632379	1.86	0.384347	0.471563	0.634515	2.528	0.480338	0.586166	0.633856	2.188	0.44361	0.523834	0.6242
ILL.pbuX-BSU22060.1~1317	2.426	0.213462	0.386283	0.783763	2.201	0.279222	0.452286	0.748054	2.271	0.265156	0.453441	0.765825	2.551	0.265558	0.478559	0.782996
ILL.ydiB-BSU05910.1~477	1.532	0.244822	0.357766	0.713182	1.449	0.262977	0.3296	0.644947	1.841	0.306817	0.436437	0.696891	1.551	0.227082	0.336653	0.715837
ILL.pycA-BSU14860.1~3447	2.397	0.295415	0.369559	0.643648	2.135	0.363826	0.428882	0.623241	2.179	0.385156	0.470449	0.638482	2.271	0.357282	0.436989	0.634623
ILL.yvaV-BSU33740.18~551	1.555	0.273827	0.369362	0.67879	1.31	0.254336	0.319282	0.649545	1.499	0.310609	0.393248	0.652864	1.862	0.299059	0.414575	0.69107
ILL.speB-BSU37490.61~933	1.892	0.271143	0.372361	0.67929	1.614	0.313159	0.373003	0.623018	1.536	0.298733	0.361142	0.63242	1.754	0.331938	0.380869	0.611019
ILL.oppF-BSU11470.2~919	1.824	0.298191	0.379061	0.651259	2.165	0.373469	0.461063	0.642623	2.593	0.430322	0.602654	0.690614	2.803	0.472901	0.659	0.690606
ILL.sigA-BSU25200.140~1255	2.091	0.31941	0.365305	0.606137	1.943	0.341037	0.416131	0.634187	2.236	0.435753	0.500475	0.609645	2.01	0.397445	0.440819	0.594795
ILL.yacD-BSU00720.47~940	1.762	0.300396	0.369407	0.634812	1.852	0.361635	0.43292	0.630613	3.25	0.434273	0.621625	0.696611	2.481	0.403828	0.550385	0.683605
ILL.glpP-BSU09270.1~579	1.762	0.275879	0.376745	0.678533	2.04	0.376146	0.480145	0.658422	2.354	0.396779	0.554838	0.689224	2.443	0.400121	0.552958	0.687301
ILL.dctP-BSU04470.1~1266	2.285	0.299458	0.366744	0.628606	1.881	0.340858	0.395965	0.616066	2.512	0.467115	0.547077	0.619285	2.366	0.350126	0.441008	0.648235
ILL.ywiB-BSU37340.59~487	1.744	0.287969	0.35545	0.635206	2.183	0.309898	0.390814	0.645301	1.87	0.38238	0.486499	0.657716	2.168	0.369216	0.475559	0.663025
ILL.yydF-BSU40180.9~158	1.257	0.259307	0.355415	0.685642	0.677	0.230267	0.231521	0.555236	1.443	0.2346	0.383701	0.751983	1.082	0.214627	0.282777	0.662807
ILL.infB-BSU16630.1~2151	1.857	0.314981	0.362327	0.609163	2.005	0.372842	0.448172	0.627565	3.426	0.486769	0.545681	0.595449	2.808	0.448136	0.516127	0.608789
ILL.yprA-BSU22220.103~2352	1.928	0.245907	0.37187	0.722835	1.757	0.283111	0.375544	0.671718	2.778	0.311021	0.5021	0.746794	2.251	0.278751	0.458243	0.753333
ILL.comS-BSU03500.1~141	1.278	0.241556	0.353625	0.714813	1.142	0.302319	0.363727	0.635305	1.064	0.216181	0.28298	0.667082	1.59	0.260528	0.374859	0.701834
ILL.menD-BSU30820.1~1743	1.85	0.265692	0.369034	0.690057	1.685	0.320721	0.401232	0.6483	2.622	0.327266	0.461746	0.693865	2.735	0.353787	0.495108	0.693257
ILL.rocR-BSU40350.6~1391	2.032	0.204753	0.370861	0.785941	1.753	0.246927	0.364533	0.713952	2.59	0.241974	0.412072	0.764278	2.245	0.205111	0.388285	0.801103
ILL.yhfF-BSU10210.1~408	1.635	0.268103	0.372798	0.687791	1.65	0.375881	0.453763	0.633845	4.232	0.451941	0.689494	0.718319	3.317	0.470276	0.67505	0.69904
ILL.yugP-BSU31310.24~701	1.763	0.209882	0.374213	0.780464	1.51	0.229994	0.317126	0.684187	2.028	0.239164	0.378447	0.735688	2.218	0.220285	0.360838	0.74478
ILL.gmuR-BSU05850.1~714	1.45	0.228593	0.365218	0.744622	1.11	0.223997	0.305048	0.685272	1.759	0.21645	0.348781	0.745102	2.216	0.259941	0.444631	0.766618
ILL.yvaK-BSU33620.123~869	1.667	0.312729	0.363955	0.615196	1.973	0.437127	0.481229	0.59463	3.09	0.514978	0.64362	0.64521	3.575	0.516604	0.699202	0.679877
ILL.yezE-BSU06860.7~591	2.11	0.244109	0.388695	0.740682	1.725	0.271658	0.362898	0.671673	1.498	0.271778	0.357439	0.667811	1.459	0.253268	0.331079	0.663294
ILL.fusA-BSU01120.2~2080	2.245	0.316621	0.361709	0.600731	2.221	0.334684	0.396107	0.616239	2.043	0.438625	0.464849	0.574454	2.117	0.377131	0.386105	0.555614
ILL.fer-BSU23040.72~320	1.603	0.295535	0.374981	0.652614	1.773	0.316962	0.411278	0.66016	1.283	0.337631	0.361103	0.58127	1.637	0.297732	0.332204	0.596564
ILL.polA-BSU29090.1~2643	1.962	0.281468	0.369204	0.665787	1.717	0.360918	0.4119	0.609548	2.992	0.381094	0.531131	0.685974	2.83	0.336826	0.496179	0.712194
ILL.yutD-BSU32310.763~1038	1.831	0.240713	0.369866	0.728545	1.791	0.283821	0.383545	0.673986	3.284	0.365324	0.633886	0.768135	2.654	0.345686	0.563033	0.751806
ILL.yybN-BSU40580.179~616	1.678	0.32652	0.364606	0.599262	2.02	0.375743	0.45089	0.630814	2.398	0.453125	0.570311	0.648824	2.25	0.406391	0.471693	0.611366
ILL.yukB-BSU31875.1~4488	2.843	0.192768	0.377376	0.808662	0.86	0.140164	0.178214	0.655144	1.03	0.131278	0.179057	0.680706	0.876	0.119215	0.154785	0.660783
ILL.natA-BSU09890.9~905	1.877	0.269025	0.370119	0.685554	1.521	0.326451	0.386106	0.625864	3.249	0.427	0.685833	0.743224	2.513	0.350278	0.51909	0.713797
ILL.ytzK-BSU29679.1~144	1.377	0.213841	0.345474	0.744036	1.357	0.245254	0.341043	0.682532	1.384	0.301349	0.394721	0.669081	0.986	0.213429	0.268179	0.650997
ILL.yqgA-BSU25050.29~457	1.6	0.348939	0.359825	0.561178	2.006	0.420123	0.457713	0.58508	1.637	0.458038	0.469868	0.563505	1.499	0.369533	0.377378	0.560506
ILL.yusU-BSU32930.18~305	1.668	0.257808	0.377743	0.709831	1.3	0.248993	0.338379	0.681841	1.741	0.257086	0.393662	0.72656	1.85	0.223795	0.32309	0.692728
ILL.mreD-BSU28010.1~519	1.569	0.245739	0.362531	0.714971	1.457	0.245661	0.320259	0.662986	1.744	0.243138	0.365872	0.719553	2.169	0.346179	0.473633	0.682633
ILL.ywhB-BSU37540.47~235	1.612	0.201653	0.364472	0.789493	1.246	0.209901	0.35364	0.765978	1.609	0.209704	0.358192	0.768068	1.194	0.198563	0.301536	0.726326
ILL.fmnP-BSU23050.106~678	1.632	0.215691	0.35619	0.756243	1.13	0.180641	0.2346	0.661845	1.429	0.216488	0.334794	0.730317	1.319	0.182744	0.265485	0.704011
ILL.trpP-BSU10010.46~564	1.892	0.265258	0.374324	0.688489	1.45	0.306655	0.382549	0.649522	1.985	0.339476	0.454903	0.671314	2.15	0.35227	0.458695	0.660901
ILL.yozO-BSU19290.151~495	1.24	0.274496	0.353956	0.662988	1.948	0.370544	0.436597	0.62102	2.583	0.418417	0.577188	0.687878	1.955	0.338531	0.417327	0.639208
ILL.yncM-BSU17690.1~753	2.129	0.20649	0.383228	0.792089	1.689	0.257535	0.384927	0.720925	1.973	0.197947	0.371691	0.795095	1.919	0.207154	0.389983	0.79897
ILL.yrzF-BSU27785.57~704	1.726	0.264733	0.371432	0.688317	1.805	0.346592	0.459535	0.67256	2.507	0.351269	0.524505	0.718986	2.166	0.335647	0.539262	0.745946
ILL.phrE-BSU25840.1~135	1.293	0.194222	0.359307	0.797087	1.209	0.255093	0.360769	0.70136	1.495	0.286278	0.412083	0.705073	0.944	0.241204	0.307136	0.65787
ILL.rnjB-BSU16780.178~1845	2.143	0.298508	0.369827	0.639594	2.056	0.337739	0.4152	0.637924	2.047	0.386272	0.465224	0.632143	2.623	0.389574	0.488334	0.643873
ILL.yqxD-BSU25230.1~495	1.713	0.323573	0.364367	0.599902	1.692	0.365345	0.432072	0.624898	2.376	0.458565	0.555505	0.631975	2.374	0.437004	0.541274	0.638952
ILL.yaaR-BSU00300.2~442	1.987	0.290617	0.380968	0.660875	2.093	0.378122	0.447963	0.621531	1.911	0.401883	0.50532	0.651601	2.02	0.36255	0.485918	0.676512
ILL.moeB-BSU14270.51~1070	1.756	0.277186	0.369046	0.671105	1.949	0.346701	0.438252	0.6495	3.22	0.447856	0.649057	0.705302	3.008	0.417163	0.625332	0.722372
ILL.prpC-BSU15760.7~771	2.204	0.282139	0.372118	0.664964	2.253	0.354801	0.423551	0.621438	2.468	0.445108	0.523667	0.617709	2.567	0.406192	0.502025	0.641658
ILL.iolH-BSU39690.1~870	2.346	0.199046	0.377674	0.798702	1.985	0.235407	0.365182	0.728833	2.359	0.239446	0.447129	0.793328	3.173	0.200287	0.416612	0.825666
ILL.manP-BSU12010.7~1959	1.63	0.319179	0.366251	0.609774	1.282	0.237709	0.261346	0.58676	1.302	0.28029	0.292642	0.568371	2.344	0.471104	0.52957	0.60054
ILL.yngC-BSU18190.14~610	1.677	0.215554	0.367002	0.766137	1.364	0.250757	0.355906	0.701253	2.167	0.340375	0.529894	0.735429	2.3	0.291206	0.4468	0.725768
ILL.argI-BSU40320.59~949	1.632	0.241704	0.369968	0.73012	1.332	0.263638	0.342319	0.664158	2.094	0.271204	0.392347	0.701789	2.36	0.26933	0.416891	0.730252
ILL.coaX-BSU00700.195~971	2.001	0.254395	0.367301	0.702808	1.767	0.298933	0.392356	0.668025	2.203	0.304683	0.408815	0.673496	2.131	0.311538	0.453364	0.706116
ILL.lytC-BSU35620.6~1496	1.798	0.262862	0.373993	0.695324	1.94	0.368666	0.449805	0.638602	3.791	0.411182	0.66229	0.745941	3.217	0.403017	0.616	0.724328
ILL.yqhT-BSU24460.1~1062	2.046	0.294904	0.363857	0.632283	1.962	0.365911	0.412546	0.60218	1.715	0.357888	0.406035	0.604368	2.193	0.3704	0.447536	0.630186
ILL.holA-BSU25560.25~1068	1.714	0.21534	0.363727	0.764586	1.995	0.287391	0.428668	0.719726	3.47	0.346596	0.604478	0.771215	3.031	0.292753	0.515057	0.7757
ILL.aroB-BSU22700.1~1089	1.558	0.318427	0.367954	0.614093	2.212	0.445369	0.535975	0.632573	3.626	0.587386	0.718509	0.636703	2.834	0.521759	0.650783	0.644658
ILL.ytrA-BSU30460.170~562	1.793	0.261968	0.360228	0.682409	1.508	0.289899	0.377926	0.667598	3.088	0.424502	0.672049	0.740132	2.391	0.403458	0.5774	0.701936
ILL.msmX-BSU38810.1~1098	2.045	0.265747	0.36755	0.6826	1.961	0.391358	0.470975	0.631479	3.744	0.41154	0.66181	0.74139	3.355	0.392871	0.597283	0.723467
ILL.hslO-BSU00710.12~887	1.588	0.306082	0.356729	0.615384	1.893	0.365484	0.407977	0.595206	2.353	0.458278	0.558541	0.634036	2.197	0.421021	0.47979	0.608746
ILL.resA-BSU23150.13~552	1.812	0.28459	0.380806	0.67245	2.001	0.372556	0.45211	0.632763	3.263	0.40472	0.591061	0.702587	2.288	0.364839	0.495026	0.681761
ILL.yocA-BSU19130.24~701	1.922	0.246861	0.363619	0.712044	1.701	0.312282	0.390359	0.646655	2.255	0.366761	0.474921	0.660497	2.335	0.331027	0.431629	0.660271
ILL.nadD-BSU25640.12~581	1.486	0.293518	0.354885	0.630996	1.943	0.341011	0.415602	0.632308	2.467	0.367927	0.486055	0.667441	2.43	0.468734	0.57894	0.643164
ILL.rpsD-BSU29660.214~816	1.684	0.278579	0.366762	0.667247	2.017	0.335495	0.418699	0.641004	2.077	0.360934	0.459971	0.653881	1.997	0.330959	0.432336	0.663923
ILL.pksS-BSU17230.81~1298	1.544	0.243577	0.366543	0.723371	2.482	0.312201	0.442443	0.69177	3.569	0.39768	0.755724	0.801799	3.482	0.35295	0.688136	0.811175
ILL.yqhL-BSU24540.62~442	1.935	0.269855	0.379843	0.685749	1.665	0.291335	0.369503	0.647743	2.22	0.340231	0.442876	0.660571	2.3	0.365335	0.467285	0.640984
ILL.coaE-BSU29060.16~609	1.731	0.262946	0.359892	0.685415	1.617	0.312022	0.389099	0.647958	2.064	0.358237	0.471843	0.668151	2.241	0.332325	0.447863	0.676771
ILL.ecsA-BSU10040.11~754	1.649	0.252455	0.368978	0.707995	2.247	0.33076	0.420571	0.649438	2.098	0.358747	0.503432	0.695154	2.799	0.387967	0.603215	0.734686
ILL.yolA-BSU21540.16~483	1.794	0.303649	0.377226	0.644302	2.162	0.454908	0.53787	0.625555	4.071	0.611418	0.90089	0.71068	2.678	0.44436	0.623599	0.694993
ILL.ykhA-BSU13030.40~558	1.585	0.268004	0.367206	0.682668	1.759	0.311452	0.395024	0.655219	1.517	0.324569	0.400286	0.642763	2.088	0.324025	0.408889	0.649554
ILL.bceR-BSU30400.22~717	2.052	0.219604	0.385582	0.773658	2.323	0.266649	0.461956	0.772417	2.998	0.26107	0.479368	0.785045	2.651	0.240997	0.548319	0.852247
ILL.miaA-BSU17330.1~945	1.918	0.23379	0.376079	0.746224	1.758	0.295218	0.424458	0.703633	2.127	0.283975	0.442785	0.733569	2.024	0.276298	0.452012	0.750101
ILL.ptb-BSU24090.1~900	1.449	0.260991	0.359735	0.687131	1.227	0.277313	0.336961	0.638181	2.029	0.314707	0.424242	0.674536	1.724	0.287962	0.395078	0.685873
ILL.mtlR-BSU04160.186~2270	1.944	0.248123	0.376505	0.722026	2.399	0.304629	0.415475	0.680178	3.156	0.351131	0.581612	0.75566	4.075	0.353636	0.589575	0.756285
ILL.murAB-BSU37100.379~1668	1.598	0.297493	0.361047	0.634864	2.072	0.358999	0.44784	0.646185	3.056	0.491846	0.621027	0.651567	3.921	0.50989	0.643798	0.649154
ILL.ytxG-BSU29780.162~584	1.78	0.29974	0.372525	0.643584	1.903	0.367948	0.440772	0.627506	2.761	0.439201	0.557528	0.652093	2.473	0.41074	0.525098	0.655995
ILL.mbl-BSU36410.54~1055	1.979	0.304511	0.363131	0.622149	1.749	0.308507	0.361231	0.615257	1.9	0.338183	0.383554	0.601342	2.45	0.397101	0.448694	0.597723
ILL.phrF-BSU37470.1~120	1.632	0.19774	0.365892	0.794004	1.219	0.172935	0.328563	0.804307	1.489	0.231247	0.354804	0.72679	1.017	0.192701	0.272662	0.700058
ILL.bdbD-BSU33480.1~669	1.791	0.289783	0.369844	0.654664	1.717	0.302381	0.376918	0.64504	2.063	0.361578	0.447293	0.642667	1.618	0.317416	0.38551	0.634719
ILL.efeN-BSU38260.19~1269	2.183	0.270948	0.367116	0.67474	1.78	0.285332	0.369667	0.661117	2.309	0.325404	0.42736	0.664969	2.965	0.323224	0.457917	0.693971
ILL.ytmB-BSU30570.1~243	1.468	0.26932	0.349133	0.66019	1.698	0.356467	0.43318	0.638046	2.645	0.38873	0.582073	0.713448	2.449	0.422107	0.547459	0.655309
ILL.qoxB-BSU38160.28~1977	1.729	0.282454	0.360242	0.649133	1.931	0.363053	0.417908	0.611937	2.578	0.401444	0.469786	0.613599	2.552	0.395443	0.470933	0.621943
ILL.yabD-BSU00390.79~846	1.795	0.242847	0.374188	0.73079	1.689	0.32367	0.421198	0.665272	2.776	0.318571	0.499662	0.735716	2.358	0.283653	0.45024	0.742201
ILL.rpsE-BSU01330.1~501	1.53	0.340388	0.364417	0.580279	1.7	0.337485	0.389024	0.607933	1.512	0.408578	0.410371	0.554982	1.652	0.396405	0.397622	0.548141
ILL.secE-BSU01000.34~213	1.425	0.24182	0.36098	0.721565	1.951	0.378115	0.474696	0.64911	2.135	0.349835	0.490783	0.691941	2.273	0.309072	0.478214	0.723085
ILL.arsC-BSU25780.12~431	1.555	0.251521	0.370695	0.708861	1.285	0.260321	0.310948	0.625566	2.09	0.299711	0.468448	0.734612	1.663	0.284221	0.37628	0.669826
ILL.yaaO-BSU00270.1~1443	1.599	0.260443	0.366906	0.696229	1.656	0.318711	0.411595	0.66238	2.38	0.357583	0.505359	0.695878	2.169	0.32151	0.482665	0.719704
ILL.yhdA-BSU09340.1~525	1.782	0.211862	0.372872	0.776909	1.677	0.275688	0.381631	0.688624	2.094	0.287024	0.475149	0.756578	2.008	0.2853	0.433039	0.719906
ILL.glpX-BSU37090.31~996	1.523	0.282601	0.34844	0.636178	1.588	0.358418	0.412508	0.613576	2.213	0.420447	0.495023	0.619368	2.535	0.429576	0.540856	0.648283
ILL.bkdR-BSU24100.51~2129	2.524	0.27166	0.376562	0.687626	1.922	0.350257	0.419112	0.630567	3.481	0.355997	0.555184	0.729937	4.083	0.374758	0.634948	0.762753
ILL.yhcZ-BSU09330.1~645	1.716	0.207668	0.370143	0.783479	1.345	0.253267	0.337632	0.673878	1.972	0.206172	0.393083	0.803134	1.759	0.210991	0.378143	0.782022
ILL.rho-BSU37080.407~1690	1.855	0.272617	0.371843	0.680965	1.917	0.323581	0.446803	0.688212	3.279	0.40151	0.625086	0.732223	3.082	0.432284	0.699793	0.749817
ILL.trmD-BSU16030.1~732	1.455	0.263681	0.364188	0.689519	1.47	0.295122	0.354916	0.626091	1.894	0.304104	0.39633	0.662846	2.174	0.332785	0.419372	0.645985
ILL.dhbE-BSU31980.1~1620	2.056	0.283024	0.376995	0.66887	2.534	0.404784	0.537599	0.67256	3.848	0.477328	0.775418	0.748717	4.196	0.497497	0.857745	0.770596
ILL.ileS-BSU15430.53~2818	1.892	0.29742	0.363674	0.635168	1.675	0.315583	0.387672	0.639607	1.898	0.356009	0.40932	0.610272	2.079	0.331971	0.396067	0.6252
ILL.yabK-BSU00540.60~290	1.401	0.247929	0.36846	0.720583	1.529	0.276057	0.359758	0.662061	1.606	0.313843	0.401887	0.658498	1.288	0.222829	0.339311	0.728711
ILL.ypbG-BSU22980.1~780	1.494	0.244094	0.366358	0.723426	1.632	0.279712	0.349878	0.646008	2.925	0.285286	0.469474	0.743493	3.41	0.287033	0.529456	0.787041
ILL.radC-BSU28040.37~732	2.406	0.271856	0.3861	0.691301	1.722	0.303923	0.385677	0.653372	2.045	0.368869	0.501907	0.681476	3.023	0.354542	0.552515	0.729655
ILL.yaaE-BSU00120.22~612	1.629	0.298339	0.361416	0.632233	1.657	0.356773	0.40284	0.605252	1.829	0.434695	0.484435	0.600456	1.936	0.416864	0.473687	0.606932
ILL.ydaJ-BSU04270.45~1133	2.295	0.181747	0.365304	0.817172	1.622	0.21672	0.319681	0.710633	1.374	0.185014	0.310385	0.76129	1.665	0.198955	0.352936	0.779115
ILL.pdeH-BSU31740.76~1305	2.071	0.272638	0.375458	0.68529	2.136	0.361553	0.444744	0.642493	3.051	0.426416	0.637644	0.717815	3.596	0.416387	0.671306	0.746106
ILL.flhA-BSU16390.1~2034	1.674	0.292175	0.367723	0.649459	1.843	0.385593	0.454652	0.62266	4.745	0.51794	0.816079	0.735964	3.825	0.490851	0.738689	0.720602
ILL.ytwI-BSU29150.1245~1709	1.735	0.256418	0.370942	0.70391	1.357	0.268591	0.333149	0.646292	1.951	0.272858	0.41353	0.722795	2.59	0.248125	0.412517	0.753518
ILL.rpmF-BSU15080.22~201	1.512	0.315788	0.383005	0.635744	2.113	0.415481	0.45842	0.582976	1.976	0.438567	0.505555	0.60602	2.223	0.427567	0.53246	0.643273
ILL.yknY-BSU14360.1~693	1.976	0.259189	0.368186	0.693298	1.787	0.342659	0.421913	0.64262	2.823	0.452747	0.594355	0.665195	2.69	0.357256	0.505336	0.691306
ILL.plsX-BSU15890.1~1002	1.683	0.284042	0.366048	0.657933	1.539	0.296545	0.359495	0.635937	2.444	0.350115	0.43316	0.637677	1.803	0.353781	0.427563	0.633177
ILL.yqjM-BSU23820.7~1023	1.779	0.220301	0.36935	0.7607	1.251	0.259262	0.32916	0.657157	2.2	0.229843	0.341804	0.713607	1.492	0.219864	0.316164	0.702373
ILL.yrrS-BSU27300.2~703	1.844	0.264526	0.368412	0.691016	1.908	0.342453	0.412275	0.626341	2.651	0.447599	0.590358	0.6693	2.788	0.360657	0.574441	0.740253
ILL.opuAC-BSU03000.1~882	1.881	0.292768	0.372851	0.652144	1.987	0.424948	0.520555	0.641235	3.068	0.519881	0.708801	0.682367	3.572	0.489032	0.673228	0.685737
ILL.yjcM-BSU11910.58~1287	1.771	0.228785	0.363935	0.742969	2.018	0.308482	0.442443	0.701487	3.685	0.358942	0.612627	0.763387	1.848	0.257583	0.388709	0.720889
ILL.dnaA-BSU00010.237~1577	1.758	0.295716	0.371553	0.647417	1.815	0.320168	0.404649	0.650808	1.887	0.341916	0.418528	0.63923	2.325	0.352927	0.453514	0.656646
ILL.yxiH-BSU39180.43~372	1.531	0.215044	0.364049	0.766692	1.209	0.234601	0.311911	0.671336	1.43	0.222934	0.331261	0.716581	1.563	0.192197	0.31029	0.740965
ILL.ycnC-BSU03850.38~916	1.661	0.224425	0.368665	0.756157	2.231	0.321636	0.47223	0.712807	2.748	0.300641	0.525535	0.775799	2.31	0.263118	0.475626	0.787034
ILL.yqjE-BSU23910.18~1133	2.004	0.267066	0.364012	0.680875	2.568	0.371569	0.494059	0.668924	2.891	0.393066	0.558469	0.697579	3.061	0.372966	0.579183	0.731739
ILL.ypvA-BSU22150.1~1926	1.699	0.292946	0.371023	0.653145	1.877	0.401374	0.472703	0.62312	3.763	0.510394	0.686217	0.674976	4.003	0.535833	0.762527	0.696377
ILL.yebE-BSU06400.5~559	2.22	0.196725	0.379404	0.80353	1.567	0.202475	0.32418	0.74619	1.647	0.207219	0.340163	0.752068	2.324	0.198985	0.422945	0.832988
ILL.mcsB-BSU00850.1~1092	1.58	0.28821	0.362082	0.647989	2.075	0.364088	0.46262	0.651971	2.121	0.420058	0.478971	0.607479	2.662	0.475978	0.617604	0.6643
ILL.ysbA-BSU28910.1~441	1.381	0.290922	0.361682	0.646353	1.885	0.384966	0.500691	0.666271	5.191	0.871155	1.22522	0.698485	4.013	0.722612	1.00947	0.69239
ILL.ydcC-BSU04630.1~1017	2.355	0.250624	0.392952	0.732956	1.963	0.278835	0.385106	0.684928	2.721	0.347367	0.587703	0.760536	2.926	0.306702	0.573207	0.7953
ILL.yabJ-BSU00480.1~378	1.376	0.354283	0.357326	0.554693	1.703	0.38831	0.431434	0.59645	1.963	0.499989	0.525552	0.572605	1.995	0.46912	0.475718	0.557417
ILL.yugI-BSU31390.1~393	1.828	0.340559	0.373346	0.588856	1.947	0.344544	0.42755	0.640796	2.353	0.451176	0.538426	0.621297	2.127	0.397716	0.479699	0.630932
ILL.yhaJ-BSU09965.17~535	1.761	0.194721	0.371908	0.805279	1.702	0.208255	0.339483	0.746045	2.841	0.273488	0.490472	0.773334	2.381	0.236046	0.449911	0.799512
ILL.proI-BSU23800.261~1097	1.825	0.216112	0.367077	0.766227	1.699	0.22699	0.324924	0.699305	2.189	0.231988	0.367311	0.736627	1.97	0.21081	0.355931	0.762097
ILL.yvzB-BSU35150.162~644	2.254	0.144678	0.387436	0.887862	2.982	0.236991	0.516382	0.839612	4.309	0.22091	0.570645	0.874198	4.81	0.269146	0.744623	0.889978
ILL.yheJ-BSU09700.39~200	1.241	0.159208	0.343783	0.840445	1.51	0.246169	0.37622	0.729864	2.128	0.256831	0.478514	0.796086	1.331	0.255221	0.381066	0.718588
ILL.ispD-BSU00900.15~713	1.644	0.268401	0.371795	0.690013	1.844	0.304667	0.382195	0.645477	2.344	0.375398	0.503711	0.673805	2.088	0.367855	0.487181	0.672852
ILL.dltA-BSU38500.1~1512	1.799	0.299034	0.371368	0.642715	1.733	0.304586	0.363835	0.627155	2.166	0.35478	0.407194	0.606727	1.941	0.346579	0.403264	0.611814
ILL.dacA-BSU00100.59~1390	1.518	0.279346	0.363971	0.667225	1.457	0.262277	0.323457	0.641449	1.993	0.321133	0.423398	0.666389	1.664	0.313455	0.380458	0.6354
ILL.ytxH-BSU29770.31~486	1.515	0.359113	0.378632	0.575002	2.489	0.47565	0.572583	0.630861	2.237	0.442978	0.522723	0.620592	2.654	0.494712	0.550088	0.594256
ILL.comP-BSU31690.1~2310	2.001	0.251329	0.370026	0.712744	1.854	0.313692	0.412966	0.670608	3.814	0.361637	0.638205	0.776656	3.742	0.382169	0.630212	0.751576
ILL.dgcK-BSU09120.3~1082	2.026	0.193857	0.377831	0.808787	2.301	0.201359	0.376347	0.795919	3.215	0.268094	0.530403	0.813715	3.059	0.253877	0.546079	0.839108
ILL.ydgD-BSU05590.1~345	1.528	0.276705	0.368695	0.6751	1.358	0.292349	0.336811	0.608221	2.062	0.399342	0.518072	0.662078	1.554	0.344497	0.398833	0.614674
ILL.yppF-BSU22260.26~214	1.283	0.299655	0.344531	0.608133	1.197	0.288336	0.305775	0.575371	1.866	0.3477	0.407127	0.608973	1.439	0.317782	0.336721	0.570505
ILL.pit-BSU12840.1~1002	1.882	0.27978	0.365597	0.661011	2.057	0.318568	0.414984	0.66232	1.98	0.334242	0.40061	0.626739	2.45	0.358694	0.46637	0.659662
ILL.nrdF-BSU17390.18~1007	1.75	0.290059	0.368787	0.653813	1.495	0.322978	0.395528	0.63982	2.348	0.377145	0.492368	0.666217	2.078	0.347051	0.409862	0.62323
ILL.ykvM-BSU13750.18~515	1.766	0.253596	0.367639	0.706399	1.796	0.314083	0.36746	0.619198	1.687	0.267226	0.384783	0.704744	1.607	0.267388	0.382268	0.701887
ILL.ythP-BSU30010.19~729	1.7	0.257431	0.362961	0.696897	1.559	0.259132	0.318585	0.637421	1.816	0.30263	0.399636	0.668594	1.608	0.248261	0.324051	0.661908
ILL.yheE-BSU09760.33~251	1.717	0.185357	0.364038	0.814182	1.789	0.231339	0.386947	0.760077	1.699	0.2362	0.410354	0.774313	1.472	0.182304	0.354378	0.810996
ILL.yozB-BSU19140.22~558	1.872	0.276004	0.388824	0.695174	1.574	0.292531	0.357761	0.638366	1.621	0.28395	0.396594	0.694861	1.79	0.264107	0.404357	0.729784
ILL.acsA-BSU29680.20~1738	1.902	0.269127	0.36995	0.683062	1.565	0.301807	0.353475	0.620339	2.488	0.366675	0.523182	0.700763	2.977	0.336978	0.567441	0.761203
ILL.racE-BSU28390.7~825	1.457	0.302574	0.355214	0.621472	1.911	0.393914	0.460443	0.618942	2.094	0.417383	0.489912	0.619499	2.228	0.417672	0.500166	0.628222
ILL.hemB-BSU28130.1~975	1.747	0.270922	0.360762	0.672139	1.799	0.330398	0.395884	0.628023	2.08	0.351455	0.457547	0.663587	2.012	0.334926	0.44976	0.678169
ILL.resE-BSU23110.1~1770	2.276	0.268766	0.374324	0.689816	2.204	0.34243	0.429198	0.649086	2.666	0.347198	0.469581	0.675978	2.578	0.326651	0.451771	0.685528
ILL.liaG-BSU33110.1~873	1.959	0.236233	0.371283	0.736705	2.186	0.264557	0.43626	0.753834	2.626	0.330075	0.52538	0.741311	3.514	0.353528	0.693562	0.814096
ILL.recA-BSU16940.1~1047	1.582	0.321027	0.375579	0.61913	2.016	0.387635	0.476282	0.638132	2.443	0.465184	0.548388	0.620419	2.312	0.429358	0.506435	0.620174
ILL.pyrK-BSU15530.1~771	1.526	0.315621	0.37043	0.622462	2.326	0.400995	0.509962	0.653684	2.073	0.437404	0.487472	0.597237	2.804	0.505907	0.636215	0.647064
ILL.ydiO-BSU06060.1~1284	2.239	0.23119	0.389777	0.757875	1.795	0.267674	0.357637	0.674467	3.099	0.300233	0.520106	0.769933	2.855	0.280342	0.472214	0.761571
ILL.gudB-BSU22960.41~1324	1.961	0.335264	0.363572	0.58429	2.027	0.409567	0.469956	0.607305	2.483	0.511463	0.569322	0.597344	2.774	0.484239	0.532664	0.587195
ILL.yqzD-BSU24930.26~379	2.513	0.33138	0.411103	0.625849	2.732	0.397525	0.534564	0.672301	4.301	0.601765	0.748375	0.636313	2.742	0.41716	0.531414	0.643157
ILL.ytzB-BSU29870.13~330	1.299	0.283484	0.357743	0.652621	1.509	0.33146	0.388596	0.623137	1.451	0.320491	0.392074	0.637686	1.729	0.303702	0.416079	0.684863
ILL.yqfL-BSU25240.26~838	1.934	0.277181	0.366938	0.672406	1.798	0.367778	0.438417	0.627127	2.411	0.406657	0.548011	0.678496	2.421	0.396483	0.540177	0.68154
ILL.thrB-BSU32240.1~930	2.278	0.238136	0.382365	0.744222	2.231	0.347737	0.420275	0.63121	3.083	0.340193	0.504757	0.711609	2.6	0.328801	0.525184	0.740943
ILL.yitI-BSU11000.2~466	1.659	0.249114	0.361984	0.706795	1.799	0.290624	0.398649	0.685307	2.181	0.301211	0.454962	0.721557	2.453	0.322671	0.530023	0.753
ILL.treA-BSU07810.1~1686	1.825	0.317906	0.362648	0.604739	2.16	0.375724	0.437299	0.614894	2.732	0.551295	0.598123	0.585362	2.916	0.4977	0.560276	0.601454
ILL.yrzA-BSU27290.21~224	1.52	0.246241	0.369011	0.715762	1.538	0.328393	0.386053	0.623694	1.843	0.269545	0.399201	0.711904	1.421	0.311223	0.40781	0.669668
ILL.ywlF-BSU36920.7~456	1.905	0.311048	0.363278	0.613435	1.626	0.312818	0.379193	0.631064	1.963	0.396278	0.502465	0.653908	2.401	0.450641	0.531135	0.615537
ILL.yclK-BSU03760.1~1422	1.924	0.222668	0.369095	0.756329	1.703	0.244172	0.358043	0.70766	1.904	0.266263	0.423412	0.742231	3.003	0.269569	0.463389	0.765806
ILL.ydjA-BSU06110.3~1400	2.325	0.249342	0.388054	0.72808	2.097	0.317122	0.4468	0.696757	4.154	0.411409	0.740609	0.784309	2.547	0.309956	0.525432	0.763521
ILL.ycgQ-BSU03240.2~859	1.87	0.186282	0.365755	0.813785	1.585	0.213678	0.307573	0.699008	1.514	0.243242	0.361684	0.717826	2.239	0.242571	0.437589	0.783447
ILL.gsiB-BSU04400.1~372	1.397	0.247673	0.378995	0.72922	0.731	0.265157	0.213164	0.45821	0.581	0.26283	0.163347	0.356754	0.841	0.220202	0.235649	0.581506
ILL.parC-BSU18100.3~2423	2.05	0.286717	0.37148	0.660109	1.837	0.339287	0.421405	0.645767	3.044	0.412695	0.548675	0.672278	2.641	0.371602	0.505686	0.682917
ILL.fliI-BSU16240.1~1317	1.921	0.290794	0.369908	0.654187	1.915	0.423574	0.477322	0.604113	3.159	0.516175	0.739211	0.70436	3.698	0.433604	0.640853	0.711704
ILL.rplN-BSU01260.41~409	1.715	0.342523	0.35618	0.564536	1.915	0.336389	0.385677	0.605764	1.86	0.463565	0.437383	0.522557	1.648	0.39757	0.384445	0.535608
ILL.yukF-BSU31920.4~1272	2.001	0.205279	0.389057	0.799506	1.625	0.205508	0.327676	0.742318	2.398	0.218152	0.390026	0.779644	1.667	0.19091	0.369057	0.807493
ILL.ytkL-BSU29410.63~746	1.681	0.28317	0.365617	0.657171	1.72	0.353307	0.437797	0.64529	1.751	0.316848	0.407254	0.65428	3.114	0.426265	0.614771	0.700564
ILL.yqxK-BSU23600.1~1164	2.626	0.220532	0.377777	0.766435	2.281	0.256671	0.380779	0.714658	2.697	0.257213	0.479373	0.794592	3.885	0.250919	0.509262	0.817153
ILL.ydbP-BSU04550.15~335	1.507	0.274734	0.368815	0.678776	1.636	0.280667	0.357885	0.650625	1.686	0.2917	0.358956	0.637278	1.619	0.311667	0.390697	0.650452
ILL.proG-BSU12910.10~828	2.179	0.241351	0.39037	0.742023	1.957	0.345343	0.446842	0.659566	3.098	0.345192	0.606544	0.775445	2.602	0.32647	0.582907	0.782642
ILL.pyrC-BSU15500.1~1287	1.766	0.332046	0.363135	0.585118	2.925	0.618364	0.692345	0.602159	2.766	0.531288	0.595186	0.598121	2.827	0.527354	0.622445	0.621817
ILL.cysC-BSU15600.1~594	1.814	0.200141	0.37042	0.795522	1.111	0.202273	0.262327	0.660584	1.865	0.187401	0.349859	0.789688	1.213	0.197655	0.297469	0.719356
ILL.fliE-BSU16200.1~321	1.617	0.288074	0.356643	0.640758	2.282	0.424121	0.533098	0.645512	3.856	0.360547	0.629658	0.770319	3.125	0.491853	0.806054	0.754538
ILL.qcrC-BSU22540.1~768	1.819	0.254233	0.376288	0.714606	1.553	0.347349	0.417969	0.632014	2.483	0.339137	0.530313	0.735845	1.736	0.296058	0.446765	0.724903
ILL.yczG-BSU03880.7~321	1.547	0.258193	0.363612	0.692105	1.531	0.281888	0.364546	0.660783	2	0.271795	0.418168	0.728409	1.818	0.323658	0.449359	0.691846
ILL.rapJ-BSU02820.1~1122	1.977	0.265301	0.372246	0.693916	1.906	0.366066	0.470906	0.661788	2.491	0.376039	0.527945	0.692115	2.355	0.362475	0.511106	0.695323
ILL.ywkF-BSU36990.1~288	1.594	0.247133	0.373413	0.719908	1.521	0.297289	0.383972	0.662173	1.841	0.303078	0.429726	0.69743	1.998	0.308734	0.483405	0.738396
ILL.cshA-BSU04580.1~1536	1.745	0.318428	0.365346	0.607194	2.12	0.346977	0.42965	0.640749	1.94	0.398005	0.463527	0.616131	2.458	0.47815	0.547851	0.608313
ILL.stoA-BSU13840.1~498	1.726	0.209359	0.381459	0.790227	1.512	0.211473	0.35255	0.757515	2.803	0.278208	0.580455	0.830192	1.98	0.2342	0.422088	0.784969
ILL.mrpA-BSU31600.142~2547	1.744	0.281483	0.371706	0.667502	1.941	0.336754	0.419414	0.644244	2.486	0.350519	0.490267	0.69254	2.854	0.386715	0.562527	0.707341
ILL.murQ-BSU01700.4~918	2.128	0.248329	0.379298	0.725599	1.69	0.285374	0.397176	0.691643	2.196	0.301573	0.494661	0.752532	2.58	0.256944	0.44761	0.772261
ILL.mnmA-BSU27500.28~1143	1.824	0.302573	0.370669	0.636489	2.066	0.380098	0.45061	0.623555	2.526	0.426695	0.520282	0.628273	2.173	0.412357	0.496459	0.630866
ILL.cspD-BSU21930.30~230	1.329	0.328147	0.382861	0.62198	1.771	0.376523	0.436826	0.614985	2.29	0.505844	0.634747	0.648495	2.155	0.328899	0.444832	0.665672
ILL.fliS-BSU35330.1~402	1.588	0.323332	0.361392	0.59895	2.269	0.512342	0.571682	0.601068	3.934	0.548041	0.866929	0.738507	3.002	0.593352	0.82424	0.690492
ILL.dusC-BSU08030.26~1003	1.723	0.300205	0.37697	0.647277	1.593	0.372704	0.424116	0.609718	2.281	0.432166	0.550781	0.656265	2.573	0.423273	0.552039	0.664623
ILL.xre-BSU12510.24~365	1.696	0.198687	0.364451	0.791687	1.873	0.234025	0.349896	0.71722	1.637	0.247864	0.387955	0.738183	1.529	0.206475	0.335792	0.748473
ILL.queE-BSU13740.1~732	2.243	0.248268	0.377727	0.721122	1.922	0.278047	0.342357	0.632268	2.568	0.341288	0.493743	0.702868	1.568	0.254694	0.362244	0.694951
ILL.ytlP-BSU29960.17~568	2.077	0.220206	0.366004	0.753449	1.741	0.295234	0.400779	0.682985	2.015	0.278801	0.441523	0.740543	2.526	0.273224	0.437318	0.741154
ILL.ybaF-BSU01470.1~798	2.406	0.253153	0.382049	0.714205	1.518	0.317304	0.410844	0.664068	2.66	0.343092	0.512537	0.712864	3.315	0.381429	0.585283	0.725152
ILL.splB-BSU13930.1~1029	2.213	0.20449	0.382464	0.793692	1.894	0.242354	0.364345	0.718982	2.771	0.271672	0.485471	0.777597	2.293	0.251412	0.442397	0.777705
ILL.moaC-BSU05960.344~856	1.511	0.246917	0.361771	0.713793	1.778	0.317363	0.443239	0.693133	3.354	0.398678	0.66128	0.754157	3.046	0.38738	0.625261	0.746674
ILL.skfA-BSU01910.38~205	1.527	0.201839	0.376725	0.797853	0.472	0.105355	0.131697	0.647536	0.539	0.107742	0.138941	0.660724	0.854	0.121355	0.176791	0.697532
ILL.ycbG-BSU02500.10~711	1.608	0.262099	0.365393	0.691301	1.457	0.323713	0.398115	0.641224	2.335	0.383377	0.537465	0.695346	1.885	0.327397	0.420297	0.657103
ILL.ybaJ-BSU01510.43~810	1.936	0.265635	0.365461	0.68039	1.573	0.318297	0.379278	0.628349	2.732	0.366207	0.545816	0.717279	1.776	0.274458	0.35529	0.660157
ILL.yjbM-BSU11600.29~664	1.775	0.33553	0.371568	0.592158	1.96	0.451818	0.49913	0.593209	2.643	0.571764	0.626614	0.590181	2.345	0.407642	0.459871	0.600692
ILL.ywbD-BSU38360.12~1202	2.037	0.251363	0.378828	0.720826	1.803	0.321327	0.422399	0.669268	2.953	0.409795	0.672777	0.75311	2.85	0.358965	0.624518	0.774007
ILL.yhdW-BSU09620.19~750	2.23	0.211008	0.377672	0.781169	1.302	0.214445	0.308383	0.705172	2.239	0.256372	0.455534	0.776536	1.612	0.227406	0.378309	0.758452
ILL.mgtE-BSU13300.396~1751	1.823	0.224914	0.37112	0.755528	1.498	0.257603	0.340841	0.671985	1.355	0.215208	0.301394	0.693702	1.698	0.211989	0.301429	0.698673
ILL.ygxA-BSU08750.78~962	1.63	0.254292	0.360914	0.699319	1.387	0.265516	0.333067	0.650465	1.459	0.254788	0.343853	0.67703	1.837	0.254504	0.342234	0.673844
ILL.yqgW-BSU24800.33~206	1.323	0.236913	0.375718	0.745875	1.822	0.404232	0.541275	0.679868	3.586	0.562391	0.870423	0.727103	2.554	0.435855	0.67778	0.734616
ILL.ktrD-BSU13500.20~1369	1.752	0.238799	0.367937	0.731994	1.666	0.261117	0.359912	0.687232	1.81	0.250335	0.387555	0.731664	2.592	0.293035	0.495024	0.759849
ILL.fabG-BSU29420.12~779	1.887	0.286239	0.368741	0.656592	2.113	0.431917	0.53844	0.646835	3.385	0.581941	0.766239	0.67086	3.441	0.486954	0.688405	0.692132
ILL.ybzH-BSU01889.1~303	1.651	0.264721	0.361583	0.680963	1.829	0.334669	0.413635	0.638805	1.993	0.378481	0.461385	0.628996	1.831	0.317188	0.378288	0.623095
ILL.yfmQ-BSU07380.1~447	1.732	0.238248	0.360727	0.720568	1.369	0.324097	0.387806	0.630467	1.928	0.288319	0.408763	0.6942	1.47	0.236929	0.340665	0.703795
ILL.ywjH-BSU37110.113~751	2.217	0.331361	0.373492	0.596562	2.038	0.40006	0.46802	0.613523	2.338	0.501204	0.502175	0.54922	2.673	0.512555	0.520822	0.550137
ILL.yeeI-BSU06840.1~720	2.043	0.332372	0.372341	0.595769	1.798	0.321854	0.353607	0.588949	1.836	0.408997	0.432429	0.573714	1.734	0.383588	0.399437	0.563518
ILL.fhuG-BSU33300.1~1011	2.386	0.246	0.387653	0.73073	1.933	0.273212	0.34588	0.645634	3.06	0.294774	0.504016	0.752229	4.081	0.306002	0.624562	0.817483
ILL.rpsS-BSU01200.1~279	1.874	0.313013	0.371488	0.619136	1.72	0.316691	0.362091	0.594464	1.864	0.438779	0.458542	0.568638	1.622	0.385826	0.381137	0.542246
ILL.clpP-BSU34540.35~628	1.535	0.324694	0.362071	0.600324	1.819	0.350438	0.402458	0.609745	1.694	0.346075	0.394204	0.603589	1.618	0.359423	0.407092	0.604792
ILL.ytsJ-BSU29220.81~1313	1.849	0.274902	0.365674	0.672324	1.651	0.314431	0.395968	0.651703	2.337	0.339043	0.455571	0.673383	2.531	0.336416	0.491119	0.707971
ILL.mecA-BSU11520.905~1561	1.963	0.212765	0.379283	0.781347	1.812	0.232968	0.388375	0.759175	2.711	0.276907	0.464604	0.758877	1.975	0.231247	0.389016	0.76025
ILL.yhdL-BSU09510.1~1077	1.724	0.281455	0.374325	0.672844	1.85	0.333523	0.42564	0.656261	2.415	0.379783	0.536176	0.695744	2.94	0.383187	0.61216	0.742271
ILL.phoP-BSU29110.101~823	1.785	0.2723	0.370006	0.68013	1.803	0.394909	0.437166	0.596974	2.155	0.406012	0.585027	0.707875	2.948	0.363307	0.555796	0.726317
ILL.motB-BSU13680.1~786	1.929	0.271791	0.365545	0.673086	2.687	0.439438	0.555875	0.651254	5.55	0.641391	1.12493	0.769107	4.573	0.531244	0.962841	0.78719
ILL.sbcC-BSU10650.1~3393	2.235	0.259946	0.367978	0.69265	1.841	0.324268	0.40129	0.643137	2.557	0.344601	0.489447	0.698479	2.739	0.336914	0.494687	0.711689
ILL.folC-BSU28080.48~1340	1.872	0.260983	0.36503	0.690963	1.455	0.289247	0.350924	0.634762	1.6	0.282602	0.370632	0.670382	1.643	0.291883	0.38668	0.671538
ILL.mrpD-BSU31630.1~1482	1.964	0.24146	0.372631	0.727715	1.787	0.281919	0.359998	0.655745	2.638	0.358467	0.519245	0.704209	2.88	0.348338	0.560203	0.741278
ILL.yjdF-BSU12030.12~494	1.671	0.341789	0.372001	0.587756	1.076	0.234303	0.256508	0.589325	1.562	0.335352	0.345515	0.561831	1.659	0.365559	0.402068	0.591836
ILL.ypbS-BSU22020.1~258	1.565	0.268965	0.368841	0.682508	1.408	0.273676	0.368041	0.676687	2.121	0.316479	0.492623	0.73579	1.662	0.293056	0.401091	0.683143
ILL.ackA-BSU29470.18~1205	1.714	0.296347	0.366168	0.637793	2.024	0.348543	0.430264	0.641082	1.875	0.351863	0.388727	0.591244	2.215	0.352331	0.39851	0.598745
ILL.ypjP-BSU21840.1~612	1.398	0.273432	0.356817	0.665657	1.449	0.306956	0.376469	0.63941	1.704	0.338747	0.431232	0.655852	2.175	0.323078	0.454731	0.689677
ILL.ftsX-BSU35250.1~891	1.995	0.280998	0.36711	0.661844	1.53	0.304785	0.387027	0.655565	2.034	0.358644	0.448231	0.640578	2.103	0.332169	0.450259	0.680975
ILL.wprA-BSU10770.18~2702	1.746	0.33419	0.368658	0.591664	2.337	0.421965	0.524869	0.642656	2.662	0.507244	0.584025	0.61074	3.45	0.5158	0.594854	0.608281
ILL.ymaB-BSU17400.50~670	1.539	0.288687	0.373202	0.663255	1.66	0.366347	0.415166	0.607018	2.893	0.472359	0.614103	0.661759	2.422	0.422837	0.588543	0.691402
ILL.tcyB-BSU03600.1~705	1.932	0.239282	0.377976	0.739278	1.468	0.224376	0.303161	0.679898	1.703	0.235303	0.315892	0.670002	2.195	0.244376	0.399179	0.748333
ILL.rpsH-BSU01300.32~430	2.065	0.350375	0.380487	0.569695	2.175	0.380712	0.405992	0.567266	2.143	0.536928	0.518734	0.53581	1.862	0.436091	0.4182	0.527505
ILL.secA-BSU35300.1~2526	2.513	0.285781	0.370918	0.656951	1.718	0.320953	0.393443	0.63757	2.127	0.384908	0.446093	0.614068	2.601	0.397064	0.47026	0.622506
ILL.yvbX-BSU34020.108~1142	1.851	0.252	0.370461	0.712338	1.982	0.360769	0.469916	0.665095	3.358	0.382141	0.674286	0.775371	3.064	0.324759	0.577732	0.781081
ILL.phrK-BSU18920.1~123	1.509	0.304811	0.365917	0.621919	1.5	0.41134	0.470877	0.613325	1.627	0.394491	0.426906	0.580695	1.162	0.335811	0.347724	0.566949
ILL.nusB-BSU24320.262~657	1.452	0.283039	0.359837	0.653947	1.594	0.304483	0.372404	0.636942	2.188	0.376967	0.487667	0.662246	1.971	0.341184	0.428565	0.64838
ILL.spoVT-BSU00560.136~672	1.471	0.259671	0.358833	0.688144	1.454	0.302967	0.351871	0.616372	1.487	0.287365	0.359461	0.649204	1.384	0.28043	0.349311	0.645488
ILL.ytlQ-BSU29950.26~940	1.523	0.251316	0.368286	0.710645	1.948	0.359484	0.427884	0.624884	2.755	0.378737	0.635685	0.762536	2.272	0.321473	0.529704	0.757088
ILL.metS-BSU00380.87~2081	1.73	0.274907	0.361777	0.66697	1.658	0.317989	0.367032	0.614124	1.863	0.336033	0.375767	0.598293	1.566	0.306378	0.367659	0.629984
ILL.yknX-BSU14350.1~1134	1.862	0.296789	0.374974	0.647603	1.988	0.397266	0.478922	0.633117	3.001	0.500579	0.630861	0.650879	2.998	0.451801	0.594324	0.663693
ILL.ytxC-BSU28960.79~924	1.539	0.26989	0.361906	0.679136	1.684	0.320373	0.405649	0.655502	2.245	0.340722	0.463435	0.681349	1.957	0.355314	0.491031	0.687596
ILL.yueH-BSU31780.73~321	2.004	0.285984	0.386627	0.670028	1.725	0.352245	0.401312	0.604618	1.912	0.346266	0.495367	0.703023	2.078	0.341911	0.471087	0.686293
ILL.purQ-BSU06470.1~684	2.227	0.182151	0.383452	0.828954	1.635	0.252331	0.385161	0.724847	1.423	0.212492	0.332372	0.735194	1.52	0.166464	0.290065	0.76741
ILL.alaS-BSU27410.80~2716	2.012	0.290586	0.367374	0.649487	1.767	0.323276	0.391186	0.634872	2.375	0.356666	0.458659	0.659076	2.317	0.357474	0.461198	0.658821
ILL.yubF-BSU31110.13~276	1.653	0.300748	0.364526	0.623161	1.555	0.376274	0.448232	0.630784	2.1	0.427533	0.480714	0.599034	1.737	0.328726	0.386644	0.606923
ILL.yoyC-BSU19479.1~279	1.586	0.268679	0.371872	0.684657	2.18	0.359857	0.46321	0.653736	2.969	0.45875	0.662673	0.706218	2.727	0.459807	0.616947	0.673397
ILL.yutM-BSU32160.1~363	1.529	0.313647	0.357709	0.608684	1.496	0.296164	0.369015	0.642293	1.618	0.338542	0.411564	0.634994	1.618	0.286244	0.332282	0.608546
ILL.yetK-BSU07210.1~993	1.965	0.247995	0.37176	0.714073	1.899	0.370351	0.435974	0.622938	2.853	0.354215	0.613356	0.773555	3.273	0.419194	0.728874	0.77298
ILL.veg-BSU00440.21~281	1.275	0.306568	0.356371	0.619524	1.451	0.363797	0.41446	0.610537	2.341	0.446864	0.519053	0.61259	1.388	0.353585	0.378591	0.57936
ILL.yclN-BSU03800.123~1073	1.765	0.282843	0.361849	0.652791	2.158	0.317065	0.418369	0.662169	3.273	0.488252	0.632786	0.658495	3.348	0.508331	0.740097	0.707813
ILL.yokE-BSU21620.14~496	1.59	0.216714	0.373295	0.768051	1.365	0.246718	0.327442	0.669487	1.62	0.222135	0.362473	0.752613	1.343	0.195188	0.308705	0.740444
ILL.gyrA-BSU00070.1~2466	1.619	0.309105	0.362099	0.616588	1.923	0.373244	0.44154	0.623863	2.762	0.432109	0.50732	0.616483	2.335	0.422082	0.468611	0.593606
ILL.fliK-BSU16270.12~1475	2.135	0.281999	0.36374	0.655961	2.144	0.397005	0.488157	0.64027	4.726	0.510066	0.821744	0.737966	3.527	0.43523	0.640912	0.710782
ILL.ykqA-BSU14500.16~849	1.796	0.313282	0.372736	0.625834	1.882	0.403046	0.455226	0.604861	2.649	0.438799	0.582489	0.671802	3.01	0.468761	0.610872	0.661514
ILL.yunD-BSU32370.20~1408	1.62	0.2432	0.372181	0.730629	1.698	0.262601	0.384995	0.711823	2.751	0.277202	0.459614	0.755462	2.72	0.272904	0.43219	0.738085
ILL.ipk-BSU00460.20~889	1.421	0.273009	0.358763	0.667575	1.972	0.314245	0.373209	0.623996	2.364	0.425213	0.563897	0.673197	1.979	0.355902	0.472274	0.671419
ILL.ywsB-BSU35970.9~545	1.679	0.316351	0.368152	0.613886	1.981	0.400904	0.504765	0.650316	1.523	0.388962	0.395991	0.55986	1.812	0.379485	0.418404	0.591549
ILL.yjcH-BSU11860.35~757	1.612	0.295747	0.370165	0.649309	1.909	0.409988	0.484298	0.624775	2.595	0.472308	0.628183	0.673937	2.978	0.423933	0.631539	0.717552
ILL.ypmP-BSU21760.6~257	1.404	0.287819	0.357798	0.645343	1.596	0.388655	0.408688	0.574297	2.002	0.394	0.4989	0.651551	1.647	0.342741	0.381401	0.596018
ILL.iscU-BSU32680.1~444	1.763	0.329151	0.367089	0.591477	1.731	0.359297	0.408371	0.600159	2.115	0.462542	0.511208	0.587366	2.2	0.457901	0.4775	0.56184
ILL.helD-BSU33450.78~2402	2.034	0.239172	0.373902	0.733738	1.474	0.272759	0.348624	0.657683	2.277	0.28249	0.448079	0.740061	2.482	0.277667	0.463774	0.759644
ILL.ytxK-BSU29480.56~1045	1.933	0.29633	0.378809	0.653844	2.093	0.376562	0.447892	0.625064	2.255	0.379535	0.490028	0.656168	3.315	0.4732	0.654105	0.686838
ILL.yceG-BSU02930.85~1698	1.704	0.246306	0.362349	0.714181	1.617	0.281742	0.364705	0.662084	2.205	0.295284	0.421152	0.699521	2.54	0.306772	0.478491	0.734939
ILL.ymfF-BSU16845.62~1342	1.672	0.279558	0.364453	0.664613	1.707	0.335392	0.415672	0.644252	2.169	0.382481	0.482738	0.64735	2.436	0.39238	0.548569	0.691855
ILL.yitT-BSU11120.541~1383	2.492	0.224154	0.382136	0.762109	1.869	0.245285	0.368854	0.71879	1.666	0.259862	0.386565	0.718914	2.058	0.267583	0.424298	0.739535
ILL.pbpD-BSU31490.17~1891	2.363	0.256949	0.373025	0.703316	1.74	0.295073	0.38237	0.66298	2.058	0.302301	0.419972	0.690749	2.845	0.332958	0.535684	0.744579
ILL.yhcJ-BSU09110.68~898	1.713	0.267204	0.358721	0.673568	1.952	0.353542	0.480693	0.684017	4.279	0.505498	0.82466	0.748859	3.951	0.481934	0.829095	0.770123
ILL.lysS-BSU00820.1~1500	1.874	0.300502	0.368534	0.638256	1.818	0.352104	0.413237	0.620886	2.066	0.374463	0.428449	0.608207	2.131	0.399569	0.456852	0.607507
ILL.xhlA-BSU12790.1~270	1.876	0.307329	0.365956	0.621024	2.384	0.721692	0.686367	0.526364	3.425	0.582884	0.880871	0.721611	1.232	0.297945	0.383404	0.664437
ILL.yjzD-BSU11270.23~208	1.386	0.27566	0.378235	0.686902	1.835	0.345474	0.415152	0.621607	3.115	0.454505	0.669738	0.702575	1.867	0.258268	0.348825	0.662807
ILL.yxxG-BSU39220.5~433	1.408	0.290987	0.365417	0.651413	1.749	0.346358	0.375697	0.583947	1.859	0.373334	0.445673	0.627224	1.299	0.273993	0.312127	0.604126
ILL.ylmH-BSU15410.55~828	2.012	0.243331	0.374213	0.724193	1.91	0.308354	0.407159	0.664354	1.955	0.34788	0.482273	0.69145	2.056	0.311833	0.426629	0.683296
ILL.ybaR-BSU01580.79~1515	2.407	0.210809	0.376861	0.779648	1.62	0.260591	0.347001	0.674334	2.942	0.297143	0.474023	0.738148	2.346	0.287011	0.464233	0.748738
ILL.yvcD-BSU34810.1~1455	1.561	0.241259	0.356104	0.713001	1.667	0.268445	0.364017	0.680062	1.997	0.298716	0.431467	0.703572	2.115	0.281541	0.441926	0.738212
ILL.ysdB-BSU28830.25~417	1.833	0.270601	0.38426	0.699851	1.612	0.267616	0.347621	0.663786	1.775	0.330177	0.389306	0.621051	1.643	0.301753	0.391874	0.66395
ILL.rbsR-BSU35910.22~1002	1.863	0.283782	0.361575	0.651945	1.62	0.302788	0.371484	0.640051	1.823	0.363281	0.428408	0.62394	1.507	0.30194	0.366331	0.636453
ILL.yaaN-BSU00260.19~1179	1.649	0.260664	0.363693	0.692572	1.545	0.281541	0.355919	0.651399	2.434	0.339466	0.527475	0.733518	1.989	0.290745	0.399786	0.686589
ILL.psd-BSU02290.1~792	1.712	0.273396	0.364673	0.673825	2.061	0.382407	0.461352	0.628844	3.027	0.463878	0.600481	0.654835	2.748	0.458721	0.601405	0.665897
ILL.dtpT-BSU03670.16~1494	1.549	0.252586	0.362949	0.703914	1.566	0.24213	0.306269	0.649393	1.73	0.265227	0.34487	0.660698	1.689	0.268188	0.365522	0.682415
ILL.mraY-BSU15190.1~975	2.129	0.291586	0.381358	0.664212	1.604	0.32513	0.386063	0.62408	1.634	0.33934	0.418361	0.64324	2.088	0.381258	0.482057	0.652793
ILL.gcvPA-BSU24560.1~1347	2.003	0.228509	0.381884	0.755647	1.951	0.279847	0.411095	0.705195	3.729	0.327215	0.583077	0.777342	3.026	0.254079	0.489786	0.799177
ILL.yurJ-BSU32550.163~1266	1.778	0.226612	0.366457	0.746806	1.822	0.27179	0.384666	0.697709	4.007	0.290675	0.563991	0.801804	2.69	0.261072	0.488267	0.794315
ILL.yloC-BSU15660.52~927	1.8	0.297901	0.379521	0.65299	2.102	0.319037	0.389377	0.629878	2.474	0.364138	0.50473	0.687033	1.964	0.369011	0.464543	0.652046
ILL.gtaB-BSU35670.70~948	1.65	0.290583	0.361093	0.642396	1.972	0.346939	0.424267	0.636491	1.797	0.324165	0.403323	0.644863	2.727	0.390429	0.485045	0.643103
ILL.pyk-BSU29180.23~1780	1.955	0.328986	0.364595	0.593914	1.957	0.388385	0.454599	0.618791	2.477	0.438216	0.469001	0.577176	2.285	0.436384	0.493231	0.601656
ILL.yxzC-BSU39200.1~369	1.207	0.26256	0.3568	0.685086	1.023	0.245456	0.284424	0.618098	1.541	0.285316	0.35343	0.644175	1.33	0.234969	0.305463	0.660261
ILL.ytxJ-BSU29760.3~329	1.601	0.266977	0.363636	0.682157	1.986	0.364678	0.469418	0.658782	1.874	0.4215	0.472776	0.597907	2.164	0.344632	0.453854	0.66115
ILL.csbX-BSU27760.1~1308	2.183	0.199678	0.366904	0.792416	1.678	0.232343	0.350385	0.722591	1.655	0.27586	0.383454	0.688394	2.922	0.270359	0.532884	0.8105
ILL.yrvI-BSU27590.1~399	1.591	0.277316	0.36801	0.672358	2.06	0.310937	0.413035	0.670709	2.222	0.439142	0.57671	0.664804	2.405	0.320279	0.475574	0.715911
ILL.yqfW-BSU25090.17~598	2.033	0.257711	0.392048	0.721099	1.696	0.316223	0.400419	0.652329	2.608	0.327489	0.502093	0.724787	2.393	0.344652	0.557127	0.748165
ILL.yuzN-BSU32669.19~297	1.65	0.236975	0.36957	0.737651	1.089	0.227956	0.302136	0.67244	1.417	0.259444	0.365162	0.692882	1.341	0.236675	0.352844	0.720871
ILL.yfmM-BSU07420.30~1586	1.697	0.272381	0.356774	0.666613	1.737	0.333129	0.393139	0.622243	3.093	0.411398	0.571287	0.687031	2.681	0.356625	0.491838	0.684335
ILL.yonS-BSU21010.1~612	1.691	0.240128	0.376681	0.736386	2.7	0.331462	0.545336	0.753307	4.915	0.391866	0.816677	0.824654	3.278	0.402631	0.700309	0.775492
ILL.mutM-BSU29080.23~853	1.682	0.293392	0.356261	0.630335	1.992	0.36717	0.437195	0.627891	2.353	0.406443	0.539068	0.669789	2.442	0.347644	0.459382	0.664381
ILL.atpB-BSU36870.1~735	1.664	0.307306	0.362032	0.621048	1.88	0.322841	0.360606	0.592844	1.931	0.374153	0.407371	0.581624	1.87	0.357355	0.399625	0.595492
ILL.sdaAB-BSU15850.139~801	1.548	0.277271	0.36054	0.661411	1.9	0.392176	0.462942	0.624811	2.396	0.396596	0.536286	0.679314	2.13	0.41734	0.561358	0.678662
ILL.yisB-BSU10660.14~316	1.957	0.23989	0.384288	0.742377	1.591	0.274396	0.378873	0.689786	2.732	0.335366	0.502712	0.711358	2.151	0.308268	0.487525	0.742692
ILL.comQ-BSU31710.67~966	1.842	0.26626	0.370259	0.690707	1.985	0.350556	0.447901	0.656083	3.863	0.399541	0.736727	0.79116	2.62	0.335996	0.514074	0.725197
ILL.ykrA-BSU14550.25~798	1.709	0.292112	0.360736	0.640368	2.114	0.376981	0.439287	0.616273	2.246	0.416647	0.549847	0.671396	3.196	0.443896	0.617636	0.69073
ILL.gabD-BSU03910.17~1405	1.764	0.227985	0.367432	0.747303	1.433	0.266389	0.344641	0.663213	1.572	0.234193	0.313737	0.674623	2.053	0.279981	0.427163	0.726453
ILL.addB-BSU10620.8~3508	2.383	0.232144	0.37988	0.748724	1.898	0.299648	0.40999	0.684014	2.586	0.287471	0.463158	0.745905	2.449	0.269945	0.478945	0.778472
ILL.nadE-BSU03130.77~895	1.698	0.299792	0.366366	0.637311	1.726	0.350431	0.411003	0.621241	2.242	0.401177	0.46274	0.610623	2.652	0.345728	0.430364	0.637547
ILL.rpsK-BSU01420.1~396	1.708	0.338455	0.375309	0.594819	1.82	0.352945	0.410938	0.612968	1.748	0.40067	0.430183	0.58398	1.839	0.43047	0.468705	0.588709
ILL.yhaO-BSU09910.12~1238	1.756	0.255694	0.363603	0.70007	1.585	0.339012	0.409006	0.635484	2.096	0.324493	0.450945	0.691275	2.137	0.326355	0.476112	0.710998
ILL.hxlA-BSU03460.9~641	1.593	0.263803	0.372848	0.699181	2.024	0.391101	0.497174	0.654765	3.137	0.395158	0.654083	0.752056	3.332	0.384634	0.652762	0.761433
ILL.htpG-BSU39820.124~2004	2.073	0.26801	0.367789	0.683122	1.887	0.344662	0.401243	0.616954	1.846	0.307916	0.37921	0.639149	1.58	0.242958	0.2906	0.628395
ILL.padR-BSU08340.61~609	2.098	0.270341	0.38423	0.693552	1.709	0.345	0.439106	0.657814	1.801	0.316269	0.462499	0.712182	3.277	0.37123	0.602757	0.745846
ILL.mscL-BSU36360.73~465	1.347	0.247984	0.36772	0.720489	1.187	0.274847	0.324248	0.625208	1.428	0.323563	0.388138	0.631095	1.825	0.324368	0.41795	0.654436
ILL.flgG-BSU16290.22~816	1.574	0.312389	0.361958	0.614951	2.412	0.460255	0.549667	0.627775	3.262	0.60237	0.780751	0.663178	3.268	0.5697	0.752467	0.671779
ILL.kipI-BSU04080.21~743	2.245	0.200589	0.396027	0.807363	2.07	0.312718	0.44381	0.694248	2.705	0.337127	0.591412	0.773907	3.138	0.288735	0.602699	0.827579
ILL.yxcE-BSU39790.129~779	1.788	0.227084	0.372687	0.752418	1.975	0.305584	0.431722	0.698058	2.988	0.300246	0.535167	0.780587	2.425	0.275536	0.474916	0.769636
ILL.yvdT-BSU34480.23~607	1.584	0.260636	0.370279	0.698194	1.667	0.343252	0.422884	0.643402	2.458	0.365879	0.498548	0.679559	2.559	0.371	0.53018	0.699704
ILL.ybfN-BSU02300.55~333	2.023	0.188248	0.375353	0.814033	1.422	0.254102	0.381717	0.723997	2.006	0.218955	0.390263	0.776479	1.537	0.243261	0.399771	0.75363
ILL.yetJ-BSU07200.23~667	1.545	0.244347	0.362823	0.713385	1.085	0.204993	0.268896	0.668847	1.236	0.192302	0.256145	0.671038	1.756	0.206263	0.278207	0.664312
ILL.adcB-BSU02870.1~843	2.352	0.232415	0.390307	0.756987	1.421	0.246003	0.338637	0.687231	2.052	0.26381	0.410438	0.727343	2.221	0.258035	0.42184	0.750562
ILL.epr-BSU38400.17~1954	2.244	0.271111	0.372888	0.68398	2.14	0.412164	0.528329	0.660152	4.28	0.468314	0.782691	0.757238	4.271	0.471893	0.818736	0.772717
ILL.yabR-BSU00630.3~389	2.016	0.305098	0.369994	0.624783	1.822	0.362551	0.421334	0.61081	3.299	0.514435	0.60874	0.617605	2.3	0.422313	0.513661	0.633657
ILL.rpsM-BSU01410.23~388	1.383	0.369387	0.359295	0.53815	1.957	0.332681	0.356605	0.570396	2.071	0.472623	0.432544	0.502724	1.55	0.436691	0.384191	0.496321
ILL.ywjC-BSU37210.9~281	1.873	0.2014	0.37952	0.792757	0.634	0.220497	0.169838	0.438127	0.594	0.236676	0.15742	0.37953	0.712	0.212483	0.191286	0.501967
ILL.yjdA-BSU11980.237~992	2.012	0.204018	0.365911	0.780416	1.428	0.223118	0.319365	0.704657	1.952	0.24321	0.395229	0.750764	1.766	0.222367	0.380503	0.768432
ILL.yxzG-BSU39170.1~453	1.843	0.272718	0.377743	0.684025	1.319	0.324179	0.344307	0.576041	1.704	0.349015	0.457988	0.666951	1.126	0.276487	0.328639	0.628453
ILL.yrvC-BSU27640.158~655	1.801	0.308388	0.373886	0.631113	1.607	0.36075	0.432963	0.633139	2.995	0.506591	0.691197	0.681723	2.233	0.430297	0.529256	0.641378
ILL.ppaC-BSU40550.27~956	1.612	0.318215	0.359145	0.598986	1.988	0.392437	0.463402	0.624831	2.028	0.437498	0.469064	0.578614	2.036	0.416765	0.461698	0.593303
ILL.copA-BSU33500.84~2492	1.966	0.231581	0.373064	0.746923	1.637	0.276855	0.368275	0.673343	2.17	0.261559	0.39906	0.72415	2.602	0.254343	0.461793	0.785152
ILL.cheW-BSU16440.22~492	1.671	0.291217	0.383442	0.667604	1.961	0.393225	0.465254	0.625402	3.009	0.475	0.689216	0.705071	3.954	0.519192	0.80923	0.731557
ILL.ypbB-BSU23030.32~1090	2.236	0.227663	0.374842	0.749738	1.928	0.282709	0.42055	0.71891	2.904	0.299495	0.511424	0.76423	2.734	0.28392	0.506816	0.783042
ILL.racX-BSU34430.16~699	1.607	0.231548	0.356838	0.731824	1.823	0.323504	0.45249	0.694212	2.397	0.373848	0.600676	0.744679	2.77	0.390618	0.641012	0.753772
ILL.yocJ-BSU19230.39~665	1.521	0.288142	0.372807	0.661602	1.604	0.366852	0.41642	0.608023	2.015	0.334567	0.431316	0.659211	2.449	0.347541	0.471213	0.675801
ILL.yaaA-BSU00030.131~346	1.562	0.230347	0.36244	0.734757	1.621	0.256947	0.360288	0.691455	1.735	0.257187	0.431657	0.762023	2.093	0.2383	0.398441	0.75659
ILL.yaaL-BSU00220.1~225	1.531	0.284972	0.35612	0.644982	1.402	0.341439	0.41019	0.633675	1.658	0.420664	0.426424	0.558562	1.264	0.306645	0.355044	0.615894
ILL.yacK-BSU00880.4~1086	1.647	0.282189	0.361896	0.659245	1.872	0.299839	0.389496	0.660295	3.285	0.360017	0.569362	0.736688	2.775	0.372839	0.556253	0.720624
ILL.prs-BSU00510.1~954	1.652	0.280006	0.361468	0.657813	1.856	0.299772	0.372055	0.640709	1.765	0.31314	0.365575	0.617936	1.683	0.327166	0.400017	0.637782
ILL.yaaT-BSU00320.1~828	1.795	0.315279	0.366125	0.60937	1.477	0.33341	0.363058	0.585024	2.028	0.387301	0.420873	0.585069	1.664	0.348005	0.400761	0.610057
ILL.yqhQ-BSU24490.49~1005	2.07	0.209048	0.374905	0.783425	1.507	0.247019	0.339119	0.684892	2.109	0.256247	0.37652	0.709309	2.232	0.245683	0.413461	0.759644
ILL.yutF-BSU32290.29~799	1.618	0.263586	0.366179	0.68937	1.742	0.333516	0.407422	0.638887	1.724	0.317196	0.406336	0.656294	2.118	0.366571	0.498755	0.682105
ILL.rplL-BSU01050.1~372	1.533	0.370922	0.370441	0.549321	1.738	0.337517	0.3567	0.563539	1.58	0.402433	0.399665	0.54882	1.341	0.394456	0.365443	0.5191
ILL.alsT-BSU18120.48~1445	2.116	0.290774	0.370511	0.650215	2.396	0.356556	0.445025	0.645465	2.699	0.417267	0.546716	0.665069	3.371	0.489634	0.613203	0.645286
ILL.albB-BSU37380.13~174	1.566	0.168588	0.359385	0.833871	0.852	0.223632	0.280791	0.652177	1.101	0.186059	0.274269	0.707496	1.299	0.202941	0.313015	0.730017
ILL.mtn-BSU27270.21~716	1.493	0.27655	0.365537	0.672638	1.425	0.323781	0.372	0.611923	1.437	0.270282	0.324654	0.627286	1.515	0.287308	0.346235	0.627335
ILL.yfhL-BSU08580.7~339	1.495	0.265611	0.37213	0.697264	1.16	0.283134	0.317705	0.603485	1.583	0.284973	0.372211	0.65729	1.49	0.266691	0.369078	0.68492
ILL.yxaF-BSU39990.7~582	1.56	0.244567	0.361282	0.71364	1.481	0.240667	0.307355	0.650368	1.767	0.274629	0.388122	0.693164	1.696	0.266351	0.390275	0.713947
ILL.ynfC-BSU18110.9~419	2.165	0.266039	0.397439	0.708927	1.994	0.350043	0.486824	0.690839	1.954	0.347373	0.435036	0.644959	2.441	0.392369	0.572598	0.711504
ILL.pncA-BSU31760.1~552	1.343	0.305395	0.363636	0.628746	1.919	0.451122	0.478023	0.576065	1.92	0.479612	0.542763	0.606665	2.313	0.495977	0.594825	0.629804
ILL.aroA-BSU29750.138~1214	1.772	0.268765	0.359253	0.673253	1.658	0.316364	0.404989	0.657482	2.451	0.391546	0.515788	0.668509	2.293	0.388092	0.485385	0.646718
ILL.yfmE-BSU07500.1~1002	2.068	0.256249	0.375761	0.70638	1.964	0.321039	0.419086	0.663924	2.571	0.341075	0.492106	0.702347	2.969	0.366719	0.609846	0.758269
ILL.yflT-BSU07550.8~355	2.514	0.170727	0.409426	0.857542	1.442	0.376749	0.418485	0.598629	1.25	0.439107	0.313987	0.406305	1.579	0.245652	0.343339	0.684204
ILL.sepF-BSU15390.1~450	1.749	0.267219	0.357152	0.667489	1.428	0.312826	0.354369	0.604201	1.678	0.301991	0.359104	0.620489	1.495	0.317758	0.366819	0.614535
ILL.yqeG-BSU25680.550~1068	2.101	0.258733	0.383069	0.713374	2.106	0.313103	0.411957	0.66256	2.634	0.302724	0.49204	0.747983	2.296	0.314872	0.489137	0.732974
ILL.flgL-BSU35400.11~907	2.171	0.299887	0.363943	0.629926	2.38	0.4584	0.544305	0.625681	4.505	0.6257	0.895846	0.697647	3.353	0.535581	0.738908	0.685961
ILL.ytlR-BSU29940.12~941	2.305	0.267757	0.381686	0.692387	2.049	0.306603	0.421398	0.681625	3.374	0.356496	0.581568	0.74894	2.697	0.330893	0.545351	0.752591
ILL.mdh-BSU29120.1~939	1.768	0.32679	0.36201	0.592683	2.285	0.384143	0.443455	0.608094	2.919	0.543634	0.621755	0.607176	2.946	0.538649	0.601822	0.595659
ILL.yerH-BSU06630.1~1191	1.546	0.276045	0.360832	0.665139	1.461	0.284834	0.34369	0.633451	2.205	0.30231	0.362361	0.626447	2.105	0.309103	0.423145	0.681256
ILL.abrB-BSU00370.59~349	1.555	0.270755	0.359346	0.669127	2.079	0.374394	0.531617	0.696759	2.504	0.424686	0.571622	0.674084	2.269	0.422202	0.589352	0.693636
ILL.yvyG-BSU35420.1~483	1.354	0.291775	0.375165	0.6634	2.484	0.374745	0.539016	0.703109	3.805	0.592685	0.882318	0.717715	3.707	0.526652	0.733727	0.687946
ILL.nasE-BSU03290.1~321	1.618	0.198098	0.351808	0.779367	1.845	0.234878	0.389881	0.749144	2.048	0.271774	0.464007	0.76693	1.523	0.236274	0.357845	0.723415
ILL.pbpH-BSU13980.83~2140	1.674	0.251691	0.370714	0.714857	1.7	0.305963	0.399105	0.666691	2.695	0.316751	0.526357	0.756674	2.37	0.3029	0.492507	0.752154
ILL.yitK-BSU11020.14~505	2.078	0.247479	0.373697	0.7194	1.679	0.301174	0.387265	0.65865	2.125	0.290212	0.441606	0.72351	1.742	0.262395	0.376308	0.701637
ILL.thrS-BSU28950.44~1975	1.73	0.318988	0.373845	0.619314	1.855	0.350893	0.434946	0.644357	2.312	0.443362	0.520548	0.620393	2.094	0.399477	0.485776	0.635053
ILL.dgrA-BSU22910.9~662	1.515	0.285234	0.350007	0.638011	2.168	0.411225	0.497781	0.633219	3.904	0.460607	0.597054	0.653007	3.669	0.487503	0.719784	0.714302
ILL.pgsA-BSU16920.50~631	1.58	0.265938	0.368964	0.689667	1.419	0.298258	0.352788	0.625576	2.599	0.340354	0.54592	0.743006	2.237	0.313608	0.466433	0.714906
ILL.yvbY-BSU34030.1~723	1.71	0.264147	0.36561	0.69023	1.166	0.21352	0.262765	0.640193	0.996	0.185153	0.21685	0.618792	1.168	0.210113	0.25083	0.625323
ILL.yuaC-BSU31070.37~579	1.87	0.243426	0.372292	0.722587	1.434	0.294771	0.376343	0.658625	2.121	0.355232	0.524667	0.712461	2.502	0.26082	0.409702	0.729372
ILL.ykzS-BSU13819.21~215	1.43	0.237222	0.362033	0.729127	1.884	0.268262	0.407311	0.724242	1.625	0.258119	0.377652	0.709575	1.556	0.222937	0.356481	0.737677
ILL.spoIISB-BSU12820.1~171	1.686	0.219656	0.376214	0.76745	1.397	0.251905	0.350621	0.691929	1.577	0.246857	0.422382	0.768927	2.455	0.245222	0.429204	0.766784
ILL.yrrT-BSU27280.6~647	1.956	0.231638	0.382906	0.749455	2.053	0.285937	0.419254	0.709999	2.07	0.312022	0.456829	0.70576	1.779	0.244876	0.372467	0.723037
ILL.yxjI-BSU38940.19~507	2.008	0.228703	0.378564	0.754741	1.434	0.283376	0.375746	0.673697	2.038	0.302564	0.499177	0.757431	1.599	0.246707	0.383007	0.73461
ILL.resB-BSU23140.1~1629	2.117	0.268533	0.364341	0.678881	1.892	0.345986	0.430642	0.644564	2.368	0.395237	0.567932	0.70518	2.404	0.372541	0.520028	0.692261
ILL.resD-BSU23120.57~779	1.534	0.291554	0.360031	0.64335	1.794	0.359652	0.420019	0.620343	2.562	0.416575	0.520632	0.642357	2.829	0.44199	0.558639	0.647375
ILL.rpoZ-BSU15690.4~207	1.682	0.356545	0.380667	0.572502	1.577	0.327414	0.407623	0.643219	1.616	0.366182	0.396745	0.575308	1.9	0.376838	0.448343	0.614932
ILL.galK-BSU38200.81~1253	1.704	0.288785	0.37182	0.658725	1.871	0.325575	0.414136	0.654077	2.349	0.411476	0.583331	0.699945	2.902	0.395212	0.610037	0.731592
ILL.dctR-BSU04460.1~681	1.925	0.227965	0.378178	0.75473	1.595	0.263252	0.372926	0.698141	2.34	0.294682	0.467368	0.739021	2.113	0.263362	0.464477	0.779011
ILL.accB-BSU24350.56~535	2.119	0.278949	0.355962	0.64639	1.973	0.354109	0.424565	0.624143	2.278	0.498846	0.572604	0.612275	2.29	0.469167	0.516433	0.589519
ILL.ytnA-BSU30530.136~1527	1.511	0.27467	0.361823	0.670019	1.661	0.31312	0.395251	0.652584	2.92	0.397809	0.504685	0.652277	2.676	0.475431	0.589606	0.645085
ILL.fabZ-BSU36370.54~479	1.672	0.253067	0.36927	0.709885	1.064	0.26436	0.293338	0.598644	1.229	0.246867	0.282009	0.607227	1.201	0.242542	0.293137	0.631554
ILL.yvyF-BSU35440.1~420	1.998	0.258382	0.380551	0.711437	2.135	0.392788	0.53021	0.678788	4.533	0.556269	1.00187	0.784117	3.233	0.507429	0.79043	0.737033
ILL.atpI-BSU36880.1~384	1.464	0.264431	0.356849	0.675964	1.476	0.334162	0.373817	0.597467	3.498	0.507886	0.726163	0.694483	2.07	0.344186	0.491065	0.691937
ILL.nusA-BSU16600.12~1127	2.253	0.308807	0.375108	0.627887	1.935	0.354981	0.416683	0.619018	1.939	0.41853	0.45349	0.584755	2.618	0.42504	0.48895	0.607741
ILL.purF-BSU06490.1~1431	2.002	0.19701	0.385366	0.809613	2.013	0.26918	0.424333	0.738923	1.509	0.190955	0.291679	0.722553	1.572	0.18835	0.309382	0.752713
ILL.ybfK-BSU02260.32~922	1.647	0.24821	0.364012	0.709832	1.906	0.357979	0.471274	0.670784	3.634	0.371606	0.629702	0.764998	3.533	0.452169	0.773798	0.768679
ILL.yeeB-BSU06770.12~1811	2.167	0.227993	0.367123	0.745646	1.925	0.282577	0.369415	0.66497	2.964	0.314092	0.562943	0.780619	3.019	0.295849	0.561843	0.799656
ILL.fumC-BSU33040.37~1425	1.815	0.308541	0.359035	0.612313	1.961	0.348613	0.425681	0.637131	2.171	0.42323	0.467955	0.59082	1.836	0.372832	0.416743	0.594706
ILL.rpoB-BSU01070.20~3601	1.962	0.303354	0.36725	0.629121	1.849	0.346159	0.406277	0.617122	2.384	0.397913	0.450129	0.599714	2.281	0.408724	0.459649	0.599559
ILL.ptsH-BSU13900.5~271	1.374	0.340474	0.359064	0.57342	1.618	0.386109	0.43844	0.605851	1.69	0.436555	0.438891	0.553504	1.313	0.37792	0.356338	0.524307
ILL.ytpA-BSU30510.22~801	1.547	0.309546	0.365724	0.624487	1.887	0.412535	0.488796	0.62657	3.024	0.555532	0.717533	0.66131	3.362	0.508797	0.680588	0.670235
ILL.sul-BSU00770.1~858	1.708	0.252888	0.36264	0.701901	1.788	0.332631	0.393338	0.618446	2.096	0.35479	0.464707	0.664173	2.288	0.340284	0.451178	0.669792
ILL.ywlG-BSU36910.13~555	2.792	0.242311	0.385394	0.733911	2.16	0.285826	0.361492	0.646839	2.641	0.275063	0.425233	0.724009	2.488	0.267829	0.411736	0.724893
ILL.ypjB-BSU22520.25~819	1.949	0.203	0.375208	0.794447	1.928	0.22398	0.377432	0.760945	2.192	0.276567	0.51261	0.794841	3.17	0.227868	0.466408	0.821064
ILL.ydiL-BSU06010.28~762	1.538	0.258209	0.359819	0.691788	1.721	0.293637	0.364798	0.642163	2.594	0.438955	0.652462	0.719636	3.146	0.395053	0.623426	0.735166
ILL.flgC-BSU16190.1~453	1.588	0.286479	0.36542	0.65253	1.622	0.369562	0.440909	0.631168	3.913	0.57158	0.846503	0.715829	2.395	0.449758	0.58464	0.663315
ILL.yxaI-BSU39960.21~476	1.492	0.23095	0.369742	0.746146	0.858	0.14589	0.191481	0.667141	0.784	0.186014	0.229006	0.645022	0.736	0.183023	0.207651	0.610222
ILL.ypjQ-BSU21830.18~551	2.066	0.302073	0.372437	0.631576	2.165	0.406374	0.525705	0.664899	2.78	0.416608	0.544308	0.660671	2.245	0.457685	0.522601	0.60661
ILL.fhuC-BSU33290.16~825	1.554	0.279631	0.369103	0.672365	1.464	0.336805	0.400591	0.628036	2.18	0.317149	0.448445	0.696155	2.435	0.416814	0.579729	0.693808
ILL.purA-BSU40420.54~1346	2.084	0.279403	0.366787	0.661264	1.914	0.354693	0.428751	0.635631	1.97	0.366227	0.430579	0.618844	2.003	0.335248	0.371802	0.593649
ILL.ycsA-BSU04000.16~1080	1.971	0.264328	0.374899	0.695257	1.843	0.307936	0.359008	0.615805	1.987	0.27319	0.395535	0.703995	1.534	0.268136	0.368196	0.684687
ILL.yebC-BSU06380.119~922	1.665	0.230286	0.368198	0.746466	1.54	0.242443	0.318838	0.670343	1.966	0.29102	0.427273	0.710832	1.643	0.237544	0.362231	0.727876
ILL.yusI-BSU32810.16~372	1.718	0.304856	0.362147	0.616498	2.218	0.396472	0.448044	0.598097	2.357	0.510019	0.57962	0.606071	2.19	0.422421	0.516438	0.636373
ILL.yqzK-BSU23519.125~352	1.918	0.237293	0.391919	0.744134	1.808	0.247456	0.392196	0.728851	3.499	0.340272	0.623184	0.779972	1.79	0.287884	0.39361	0.671144
ILL.ytoP-BSU29860.238~1311	2.34	0.268365	0.382727	0.698605	1.913	0.311599	0.41441	0.673786	3.313	0.371941	0.620584	0.758857	2.885	0.37189	0.612041	0.753559
ILL.mapA-BSU01380.1~747	1.995	0.30547	0.362691	0.621207	1.962	0.313082	0.386376	0.638343	2.055	0.414125	0.450709	0.586832	2.175	0.373043	0.405308	0.582493
ILL.fni-BSU22870.1~1050	1.744	0.281349	0.363367	0.657459	1.861	0.326548	0.415625	0.655348	2.711	0.334857	0.467448	0.690112	2.663	0.389444	0.553318	0.697681
ILL.ylaL-BSU14820.8~493	2.22	0.269055	0.372302	0.687171	1.509	0.298389	0.362172	0.636519	1.651	0.293663	0.387254	0.67161	1.556	0.330213	0.413789	0.651134
ILL.gltC-BSU18460.31~933	1.783	0.264129	0.367056	0.690296	2.714	0.461578	0.60248	0.667298	3.031	0.47892	0.742759	0.734796	3.752	0.465284	0.751033	0.74556
ILL.yvrP-BSU33280.22~1215	2.149	0.275897	0.377524	0.682871	1.721	0.337813	0.434408	0.660646	2.746	0.37289	0.624055	0.761127	3.534	0.397211	0.653706	0.756088
ILL.yabM-BSU00570.50~1648	2.478	0.21299	0.38911	0.784074	1.693	0.213213	0.319567	0.716745	3.417	0.259315	0.51878	0.817234	3.018	0.255698	0.489997	0.802825
ILL.sigB-BSU04730.1~789	1.606	0.278332	0.363219	0.663377	1.739	0.338073	0.376034	0.598283	1.414	0.32431	0.361108	0.601191	1.518	0.281443	0.328975	0.619471
ILL.exoA-BSU22010.12~902	1.834	0.234823	0.373824	0.739793	1.376	0.269436	0.355809	0.67022	2.091	0.289431	0.444396	0.729494	2.673	0.305718	0.47535	0.734483
ILL.fabG-BSU16870.55~783	1.804	0.22787	0.367685	0.745712	1.427	0.253975	0.359085	0.696223	2.503	0.315691	0.489579	0.731434	2.6	0.2601	0.441956	0.763215
ILL.yocR-BSU19340.18~1355	2.266	0.224299	0.384444	0.765589	1.586	0.247577	0.362664	0.709057	2.657	0.269037	0.517614	0.806844	2.927	0.309066	0.567872	0.791669
ILL.lytD-BSU35780.75~2717	1.953	0.252802	0.364178	0.704579	2.429	0.362719	0.459143	0.653956	3.806	0.44664	0.765666	0.768509	4.5	0.386786	0.724713	0.795109
ILL.yitH-BSU10990.5~853	2.328	0.228604	0.37112	0.746879	1.646	0.310388	0.403776	0.664092	2.161	0.31318	0.488213	0.734838	2.686	0.296461	0.498173	0.759083
ILL.yfmR-BSU07370.19~1908	1.901	0.266659	0.37344	0.691143	1.694	0.323752	0.423514	0.667866	2.045	0.32375	0.457338	0.697007	3.064	0.347898	0.525281	0.72205
ILL.yvlA-BSU35130.226~552	1.557	0.237638	0.368507	0.732778	1.544	0.253573	0.382051	0.723982	2.1	0.281496	0.430852	0.723663	1.767	0.269784	0.435853	0.749866
ILL.csbD-BSU36670.1~189	1.662	0.220542	0.384381	0.774207	0.691	0.233021	0.20903	0.50517	0.648	0.249083	0.191272	0.438925	0.79	0.201542	0.212365	0.571307
ILL.serA-BSU23070.25~1602	1.977	0.287823	0.369134	0.652985	1.792	0.34516	0.401947	0.618378	3.37	0.382312	0.493919	0.658604	3.062	0.351821	0.462544	0.664623
ILL.rpmI-BSU28860.13~213	1.762	0.313061	0.367518	0.613116	1.984	0.347176	0.392177	0.593277	1.467	0.364504	0.386671	0.576432	1.585	0.400336	0.399636	0.548932
ILL.speD-BSU29010.118~498	2.185	0.280665	0.379452	0.655042	2.235	0.330564	0.391607	0.61367	2.457	0.391956	0.445581	0.599886	1.988	0.367621	0.411279	0.583828
ILL.ycbJ-BSU02520.151~1071	1.773	0.248482	0.371139	0.717331	1.696	0.318978	0.399403	0.648521	2.612	0.331331	0.536888	0.747174	3.374	0.316133	0.561819	0.778226
ILL.secDF-BSU27650.39~2252	1.644	0.292269	0.357824	0.636789	1.828	0.345699	0.400329	0.611807	2.384	0.425995	0.507449	0.623258	2.191	0.379112	0.425264	0.598595
ILL.clpC-BSU00860.1~2433	2.043	0.284614	0.361084	0.652129	2.115	0.379447	0.444171	0.620905	2.147	0.349845	0.425214	0.635531	2.279	0.357662	0.486423	0.680629
ILL.yndN-BSU17840.15~449	1.951	0.204731	0.368745	0.784991	1.781	0.234518	0.358559	0.726888	3.391	0.242608	0.48738	0.813982	1.667	0.228407	0.365746	0.744208
ILL.rpoC-BSU01080.62~3661	1.94	0.315059	0.364034	0.613518	2.176	0.358713	0.421456	0.618254	2.486	0.45409	0.508835	0.599888	3.112	0.424837	0.476885	0.597786
ILL.tufA-BSU01130.33~1223	1.765	0.342648	0.367152	0.578343	2.343	0.390843	0.429035	0.585754	2.174	0.441231	0.465731	0.570932	1.829	0.389463	0.410009	0.568737
ILL.hrcA-BSU25490.1~1032	1.878	0.248673	0.379178	0.726409	1.627	0.271659	0.341554	0.651127	1.497	0.253582	0.32118	0.651832	1.501	0.284069	0.366698	0.661145
ILL.acuC-BSU29710.1~1164	2.136	0.212022	0.37706	0.780915	1.608	0.264028	0.367486	0.690869	1.757	0.215821	0.340976	0.738481	2.683	0.245644	0.449076	0.789382
ILL.recU-BSU22310.823~1443	1.899	0.227221	0.374657	0.755218	1.68	0.248957	0.371507	0.718682	2.143	0.251699	0.418562	0.7568	2.633	0.265577	0.485055	0.789847
ILL.yutJ-BSU32200.53~1120	2.202	0.237416	0.374003	0.738191	1.971	0.23425	0.374278	0.741147	2.121	0.270418	0.425839	0.736684	2.704	0.297068	0.470241	0.739593
ILL.yrhO-BSU27110.17~844	1.688	0.204718	0.365917	0.783258	1.684	0.252178	0.375433	0.716358	1.801	0.192228	0.368683	0.804026	2.064	0.192216	0.368875	0.804472
ILL.ykvA-BSU13630.61~381	2.454	0.178054	0.383285	0.836817	1.899	0.212492	0.403759	0.801588	1.914	0.159155	0.3331	0.827513	1.983	0.189977	0.375402	0.812541
ILL.mcsA-BSU00840.1~558	1.702	0.246182	0.37044	0.718452	1.695	0.327551	0.397617	0.636781	1.69	0.274158	0.390266	0.69715	1.952	0.326572	0.48036	0.715135
ILL.dgk-BSU00150.36~659	1.671	0.253814	0.359308	0.695363	1.427	0.298236	0.364062	0.638595	1.836	0.269024	0.382843	0.697675	1.995	0.310369	0.46568	0.721381
ILL.fabL-BSU08650.162~914	1.748	0.277252	0.359748	0.658148	1.799	0.318261	0.380635	0.626021	2.143	0.35488	0.429046	0.629111	2.436	0.391366	0.51743	0.667656
ILL.dapB-BSU22490.12~815	1.685	0.291991	0.363293	0.645487	2.063	0.426355	0.512862	0.630919	2.08	0.432178	0.524063	0.636191	3.215	0.467661	0.597901	0.651832
ILL.ypmA-BSU22390.143~313	1.632	0.305021	0.369484	0.625144	1.448	0.341986	0.382594	0.60334	3.804	0.7178	0.95027	0.67196	2.294	0.459848	0.580562	0.652684
ILL.ytwF-BSU30310.117~428	1.589	0.33791	0.382382	0.604209	2.075	0.3628	0.480717	0.667249	2.67	0.447052	0.620453	0.689539	2.137	0.397252	0.504542	0.649097
ILL.pbpX-BSU16950.30~1205	1.826	0.279844	0.375596	0.673967	1.599	0.305137	0.389913	0.65804	1.927	0.324825	0.419513	0.65967	1.983	0.302259	0.395197	0.664533
ILL.rsbS-BSU04680.3~368	2.04	0.281729	0.378177	0.668102	1.248	0.317867	0.363466	0.612109	2.858	0.391337	0.488688	0.630158	2.495	0.398596	0.560871	0.689888
ILL.yusH-BSU32800.1~384	1.61	0.358249	0.371037	0.565705	1.791	0.396376	0.448708	0.602691	2.985	0.555153	0.574376	0.559482	1.758	0.459116	0.461132	0.544109
ILL.yfkA-BSU07955.37~1158	1.874	0.23413	0.371424	0.740992	1.841	0.297464	0.363323	0.633894	1.488	0.280016	0.385601	0.68765	1.842	0.266758	0.425457	0.745562
ILL.birA-BSU22440.1~978	1.657	0.262335	0.360505	0.685607	1.435	0.291717	0.361708	0.645632	1.779	0.323582	0.450001	0.690541	2.408	0.305574	0.427466	0.688715
ILL.yrrB-BSU27490.86~706	1.553	0.284168	0.363804	0.656284	1.694	0.356014	0.411	0.61216	2.548	0.379359	0.508349	0.671273	2.562	0.384062	0.512126	0.673166
ILL.ligA-BSU06620.24~2030	1.8	0.2914	0.368286	0.651648	1.575	0.326384	0.393097	0.633284	2.568	0.39578	0.50291	0.654938	2.688	0.375815	0.501259	0.673442
ILL.yyaL-BSU40820.1~2070	2.259	0.261031	0.368307	0.691366	1.819	0.368181	0.441085	0.63106	2.922	0.388516	0.573384	0.711163	2.558	0.354993	0.555464	0.736376
ILL.aroE-BSU22600.1~1287	2.032	0.303767	0.36822	0.631121	2.213	0.379095	0.466876	0.639073	2.562	0.492982	0.594763	0.634285	2.547	0.473799	0.568059	0.630029
ILL.yrvJ-BSU27580.301~1857	2.59	0.248333	0.383803	0.726521	2.252	0.359006	0.444622	0.642969	2.706	0.35208	0.521801	0.714076	3.017	0.295414	0.499242	0.762655
ILL.yqiK-BSU24180.8~739	1.675	0.221371	0.359354	0.749278	1.369	0.244842	0.34512	0.698554	1.931	0.257896	0.423183	0.753936	2.106	0.241744	0.442688	0.792045
ILL.bkdB-BSU24030.23~1297	1.92	0.292522	0.380774	0.662166	1.789	0.353579	0.423397	0.629628	2.201	0.362374	0.457856	0.652895	1.847	0.366704	0.449556	0.639071
ILL.yjcG-BSU11850.1~516	1.355	0.310043	0.360992	0.618175	2.622	0.479344	0.57473	0.630309	3.704	0.581855	0.756956	0.656469	2.88	0.565149	0.697031	0.642488
ILL.accA-BSU29200.1~978	2.145	0.290979	0.359209	0.635806	1.642	0.319057	0.38796	0.631488	2.17	0.407448	0.518608	0.655432	2.079	0.372143	0.447581	0.627063
ILL.flhP-BSU36390.34~843	1.41	0.259555	0.355169	0.685579	1.877	0.380527	0.474869	0.649108	3.12	0.478756	0.714924	0.717472	3.082	0.458618	0.717384	0.739125
ILL.moeA-BSU14280.18~1310	1.425	0.265481	0.357285	0.679775	1.64	0.358124	0.428019	0.63169	2.791	0.363695	0.534247	0.708499	3.467	0.407793	0.656988	0.7468
ILL.yyzE-BSU40120.198~428	1.947	0.275822	0.370915	0.669337	1.797	0.361984	0.431475	0.62854	1.857	0.356068	0.491427	0.690194	4.042	0.423251	0.802939	0.802282
ILL.araR-BSU33970.1~1155	1.671	0.263154	0.369955	0.693973	1.722	0.293134	0.37684	0.660184	2.296	0.329665	0.468602	0.695905	2.718	0.3086	0.465538	0.713677
ILL.hemZ-BSU09840.20~1525	1.799	0.236543	0.371273	0.736465	1.813	0.268792	0.358178	0.671548	2.294	0.290142	0.432065	0.715456	2.206	0.284719	0.43533	0.729318
ILL.yrrK-BSU27390.1~417	1.785	0.302941	0.369298	0.634051	1.634	0.399083	0.435262	0.589926	2.706	0.49538	0.657432	0.668219	2.685	0.467907	0.592483	0.649734
ILL.yybS-BSU40520.111~1040	1.783	0.24131	0.37022	0.73027	1.812	0.264648	0.383704	0.701736	2.981	0.317742	0.491407	0.729033	3.423	0.309677	0.555027	0.772299
ILL.yknZ-BSU14370.1~1194	1.964	0.248634	0.367139	0.709312	1.553	0.285701	0.349401	0.636721	1.874	0.292867	0.420781	0.702386	2.512	0.338482	0.500416	0.71026
ILL.yxdJ-BSU39660.21~710	1.624	0.227704	0.363049	0.741549	1.689	0.293012	0.394577	0.677078	4.094	0.360052	0.624759	0.766608	2.949	0.299988	0.56262	0.797272
ILL.ydhG-BSU05750.122~493	1.478	0.318529	0.364134	0.610225	1.848	0.461176	0.490367	0.579845	3.15	0.600863	0.734012	0.634866	3.105	0.624551	0.738821	0.622629
ILL.glpD-BSU09300.48~1715	1.902	0.222151	0.371966	0.761094	1.74	0.274887	0.381116	0.689972	2.247	0.245635	0.416198	0.760272	2.774	0.259155	0.480135	0.79241
ILL.yjzI-BSU12229.13~201	1.389	0.278705	0.359381	0.657403	1.948	0.509438	0.612664	0.635944	3.92	0.543952	0.789218	0.704116	2.75	0.4428	0.605594	0.67999
ILL.rsbU-BSU04700.1~1008	1.788	0.279366	0.360998	0.656624	2.029	0.347311	0.424219	0.63784	2.435	0.389648	0.50315	0.654843	2.531	0.384917	0.519819	0.675767
ILL.ydaF-BSU04210.11~562	1.587	0.243489	0.356401	0.708132	1.697	0.292772	0.384438	0.66568	2.456	0.265502	0.463802	0.772965	1.76	0.233971	0.367468	0.739027
ILL.metK-BSU30550.168~1370	1.827	0.30428	0.362478	0.622626	1.953	0.330553	0.389627	0.619151	1.972	0.381663	0.4382	0.608741	1.923	0.343431	0.385829	0.600089
ILL.yurR-BSU32630.443~1561	1.906	0.232781	0.379411	0.749935	1.558	0.247354	0.340678	0.686005	1.733	0.245266	0.370589	0.722733	2.412	0.274009	0.432053	0.737344
ILL.queD-BSU13730.1~450	1.236	0.188291	0.339609	0.788841	1.185	0.211991	0.306688	0.707746	1.567	0.205105	0.357451	0.774307	1.314	0.204441	0.322026	0.739245
ILL.resC-BSU23130.1~1176	1.619	0.247008	0.360975	0.710724	1.685	0.345019	0.437612	0.654721	2.268	0.335794	0.481831	0.700919	2.645	0.367363	0.565676	0.732132
ILL.ywlC-BSU36950.46~1086	1.514	0.271375	0.362386	0.676814	1.944	0.321601	0.401801	0.646577	2.066	0.331434	0.466419	0.69564	2.402	0.364404	0.532337	0.708937
ILL.yjoA-BSU12410.24~488	1.591	0.28728	0.371972	0.662228	1.744	0.375072	0.469923	0.652131	1.71	0.345853	0.412921	0.629055	2.198	0.367763	0.477357	0.661086
ILL.yppQ-BSU21680.1~432	1.562	0.24058	0.365365	0.725632	1.601	0.321176	0.419314	0.667259	2.717	0.367916	0.617108	0.759619	2.426	0.352811	0.563597	0.745364
ILL.efeM-BSU38270.1~1158	2.062	0.301501	0.367859	0.633859	1.74	0.354282	0.418438	0.624231	2.517	0.402049	0.495449	0.639849	2.576	0.419056	0.521946	0.644179
ILL.rsiX-BSU23090.1~1107	1.982	0.225323	0.379916	0.761487	1.447	0.226765	0.333589	0.71503	1.754	0.227591	0.360806	0.741615	1.789	0.217978	0.342187	0.737854
ILL.ydfG-BSU05400.35~478	1.641	0.265381	0.376221	0.699289	1.236	0.260021	0.319705	0.644036	1.9	0.330762	0.466454	0.694133	1.903	0.270247	0.380888	0.693168
ILL.groES-BSU06020.58~342	1.307	0.325848	0.345402	0.575661	1.356	0.304473	0.350675	0.608072	1.558	0.392255	0.365153	0.517073	1.24	0.320788	0.325151	0.552516
ILL.deaD-BSU39110.1~1440	2.241	0.258905	0.374848	0.703848	2.047	0.304936	0.409599	0.677997	2.755	0.338527	0.469397	0.68552	1.998	0.31905	0.463572	0.710451
ILL.yfkK-BSU07870.21~236	1.672	0.277683	0.366316	0.661943	1.623	0.30722	0.410489	0.669306	1.74	0.326959	0.447724	0.686335	1.843	0.363024	0.50678	0.69296
ILL.ykrK-BSU13480.39~740	1.649	0.247133	0.366914	0.715957	1.413	0.270854	0.354481	0.66773	2.073	0.282124	0.408557	0.706635	1.375	0.230636	0.349165	0.727139
ILL.yodL-BSU19640.58~372	1.862	0.231319	0.382981	0.756108	1.401	0.261495	0.3759	0.707213	1.815	0.257879	0.410109	0.742515	1.754	0.288346	0.449891	0.736063
ILL.rplD-BSU01170.28~651	1.489	0.314377	0.353105	0.597414	1.781	0.33417	0.38343	0.607488	1.741	0.436672	0.446877	0.562662	2.173	0.4059	0.42844	0.570416
ILL.secG-BSU33630.34~264	1.261	0.325439	0.342875	0.56662	1.924	0.352469	0.393179	0.588442	1.835	0.446449	0.443415	0.541642	1.233	0.346204	0.383308	0.596535
ILL.yhbA-BSU08910.71~1231	1.894	0.204494	0.372834	0.787535	2.037	0.275572	0.400975	0.705005	2.86	0.27094	0.434736	0.737669	2.9	0.228876	0.418258	0.782813
ILL.ykwC-BSU13960.56~922	1.811	0.30603	0.367541	0.628167	1.69	0.358118	0.435734	0.638636	1.974	0.377457	0.427742	0.604757	2.421	0.400979	0.531071	0.668023
ILL.yqcF-BSU25870.15~593	1.743	0.200883	0.362775	0.787453	1.708	0.271254	0.398761	0.713733	2.338	0.260223	0.465526	0.784727	2.057	0.245275	0.390824	0.739624
ILL.addA-BSU10630.1~3699	1.848	0.246492	0.367354	0.718195	1.777	0.312508	0.394873	0.651829	2.573	0.286246	0.444216	0.73176	2.5	0.28446	0.451213	0.739518
ILL.gmk-BSU15680.8~622	1.716	0.303371	0.370133	0.629258	1.641	0.317294	0.377339	0.626562	1.843	0.400816	0.436577	0.584584	1.808	0.341016	0.38883	0.605885
ILL.yjcF-BSU11840.4~426	1.663	0.236685	0.364681	0.729496	1.51	0.309136	0.374831	0.633671	2.252	0.335146	0.49838	0.714707	1.942	0.317831	0.494673	0.737355
ILL.nrdR-BSU29000.196~654	1.55	0.248229	0.364619	0.710017	1.475	0.274022	0.355977	0.661187	2.072	0.314884	0.425524	0.676396	1.633	0.271223	0.364911	0.677004
ILL.yqjD-BSU23920.1~1524	2.119	0.261839	0.374971	0.698416	2.171	0.301328	0.433532	0.703907	2.707	0.400423	0.598314	0.721559	2.861	0.381362	0.591187	0.733454
ILL.yhcC-BSU09030.1~375	1.758	0.211231	0.376334	0.779229	1.622	0.221738	0.334923	0.71793	1.596	0.188887	0.300475	0.739958	1.626	0.227456	0.360626	0.74052
ILL.dnaI-BSU28980.1~936	1.813	0.266166	0.372756	0.693821	1.666	0.346312	0.433517	0.650382	2.426	0.357144	0.516866	0.706055	2.441	0.363701	0.489708	0.671281
ILL.dnaX-BSU00190.179~1870	1.799	0.266625	0.367	0.684948	1.81	0.302365	0.376532	0.645164	2.679	0.315838	0.461689	0.704264	2.911	0.298266	0.444766	0.706428
ILL.yfnB-BSU07330.14~721	1.753	0.27384	0.374299	0.683747	1.676	0.349542	0.448604	0.662109	2.937	0.407899	0.610558	0.719456	2.707	0.381354	0.60658	0.742255
ILL.fabHB-BSU10170.4~981	1.717	0.212137	0.371059	0.776608	1.032	0.213215	0.233402	0.588517	0.992	0.172118	0.226413	0.667007	1.036	0.16248	0.235217	0.707473
ILL.rplR-BSU01320.33~395	1.37	0.340164	0.355242	0.569972	1.795	0.378507	0.408939	0.577671	1.585	0.469771	0.434026	0.517951	1.601	0.465388	0.410878	0.498386
ILL.ppiB-BSU23360.76~507	1.655	0.318026	0.361374	0.599782	2.453	0.383978	0.484268	0.644034	2.345	0.447316	0.498497	0.595569	2.645	0.393543	0.517105	0.658768
ILL.yxiJ-BSU39150.28~324	1.585	0.245298	0.368479	0.720929	1.114	0.292715	0.33511	0.612764	1.027	0.203377	0.281821	0.693331	1.116	0.237179	0.313647	0.672873
ILL.rpoE-BSU37160.1~522	1.422	0.339063	0.366361	0.586088	1.952	0.385587	0.43925	0.6053	2.424	0.436127	0.496267	0.600288	1.75	0.384841	0.413246	0.580058
ILL.yqfO-BSU25170.1~1122	1.849	0.272051	0.364651	0.674002	1.66	0.369292	0.428531	0.616923	1.977	0.373917	0.479232	0.659364	2.062	0.355503	0.453492	0.650434
ILL.pel-BSU07560.40~1302	1.626	0.293125	0.367911	0.648553	1.684	0.336688	0.40074	0.627302	1.971	0.337899	0.388935	0.608981	1.724	0.317524	0.372799	0.621067
ILL.ymfC-BSU16810.1~726	1.703	0.290398	0.365519	0.64381	1.797	0.398887	0.463419	0.615646	2.947	0.487367	0.709582	0.711389	2.785	0.454475	0.630563	0.691992
ILL.fliF-BSU16210.1~1611	1.841	0.26734	0.367526	0.683315	1.858	0.355508	0.432834	0.638251	3.067	0.372038	0.565004	0.722382	3.085	0.414514	0.634875	0.729393
ILL.ydgK-BSU05680.60~1268	1.96	0.215687	0.375041	0.772372	1.649	0.251299	0.341048	0.678687	1.742	0.255238	0.37948	0.713218	2.457	0.258731	0.437953	0.762885
ILL.xseA-BSU24300.138~1484	2.158	0.257223	0.374708	0.704982	2.082	0.321042	0.434078	0.67874	2.838	0.340904	0.537614	0.738529	3.214	0.35092	0.569516	0.745638
ILL.parA-BSU40970.31~792	1.691	0.312312	0.369579	0.622854	1.473	0.324031	0.380799	0.622908	3.18	0.454861	0.574366	0.647798	2.19	0.400256	0.495597	0.639321
ILL.ywzH-BSU38499.122~271	1.67	0.280887	0.377191	0.672487	1.56	0.294065	0.355974	0.629031	1.901	0.301315	0.438658	0.705444	1.579	0.282484	0.382043	0.680607
ILL.rplQ-BSU01440.1~363	1.601	0.307619	0.357002	0.614924	2.086	0.346862	0.411988	0.611476	1.624	0.361021	0.41202	0.602914	1.752	0.362175	0.410906	0.601019
ILL.infA-BSU01390.1~219	1.446	0.338587	0.369444	0.588946	1.869	0.311868	0.375836	0.616417	2.275	0.466934	0.493845	0.57157	1.295	0.390926	0.382407	0.544309
ILL.pspA-BSU06180.27~710	1.607	0.306712	0.370224	0.631428	1.818	0.458119	0.488904	0.578976	3.061	0.568777	0.703022	0.637337	2.825	0.474852	0.629011	0.669819
ILL.ywnF-BSU36580.6~440	1.729	0.286851	0.379152	0.670483	2.118	0.266829	0.450099	0.759285	2.1	0.361266	0.474007	0.661049	2.142	0.287833	0.464396	0.745099
ILL.bcd-BSU24080.1~1095	1.765	0.269987	0.368811	0.682482	1.718	0.341172	0.417395	0.639981	2.04	0.390492	0.516407	0.672456	2.024	0.363535	0.484512	0.673962
ILL.yueD-BSU31840.2~733	1.62	0.251347	0.365191	0.708773	1.253	0.222587	0.278284	0.644957	1.871	0.267311	0.355901	0.669257	1.39	0.230255	0.307878	0.672002
ILL.hemC-BSU28150.33~977	1.88	0.28431	0.368446	0.659349	1.871	0.431024	0.472508	0.592598	2.48	0.463177	0.624927	0.678782	2.776	0.400749	0.556329	0.690474
ILL.dsdA-BSU23770.32~1378	1.87	0.213445	0.370122	0.771869	1.526	0.279527	0.366052	0.668134	2.493	0.23619	0.460856	0.807421	2.276	0.250206	0.45843	0.790742
ILL.yppE-BSU22270.6~377	1.599	0.225989	0.362774	0.745666	1.76	0.273369	0.394649	0.704158	1.37	0.232916	0.342967	0.714757	1.847	0.247425	0.379004	0.71321
ILL.acuB-BSU29700.27~671	1.508	0.255125	0.376595	0.714587	1.584	0.292304	0.364375	0.646657	2.025	0.261301	0.446073	0.767486	2.424	0.321028	0.51448	0.741568
ILL.ytaF-BSU29070.166~798	2.338	0.257977	0.368709	0.698227	1.898	0.313956	0.401475	0.657801	2.57	0.336746	0.529264	0.730612	2.515	0.320997	0.481109	0.71589
ILL.whiA-BSU34750.6~956	1.459	0.281329	0.362431	0.659809	2.094	0.396833	0.475289	0.630659	2.934	0.427791	0.582559	0.681496	2.495	0.392004	0.534896	0.681067
ILL.etfB-BSU28530.15~788	1.54	0.271143	0.367114	0.679686	1.724	0.364191	0.424837	0.62012	1.963	0.37986	0.49492	0.664693	2.558	0.417697	0.55583	0.672479
ILL.topB-BSU04260.6~2189	1.994	0.28239	0.37041	0.664737	1.841	0.366627	0.439306	0.630572	2.578	0.399126	0.534235	0.676461	2.508	0.371864	0.529365	0.700686
ILL.atpA-BSU36830.17~1525	1.68	0.312242	0.364387	0.616865	1.883	0.350335	0.436571	0.645852	2.109	0.391868	0.432917	0.593375	1.933	0.395661	0.428198	0.582349
ILL.ylaF-BSU14760.20~208	1.596	0.293429	0.369279	0.643301	1.308	0.285952	0.363555	0.652334	1.435	0.26594	0.369194	0.690664	1.252	0.234321	0.314466	0.671984
ILL.gyrB-BSU00060.1~1917	1.808	0.292689	0.364731	0.643618	2.028	0.346647	0.426441	0.639705	2.407	0.405881	0.499926	0.639499	2.64	0.428557	0.523622	0.633761
ILL.recG-BSU15870.1~2049	1.88	0.248683	0.374435	0.720282	1.838	0.307369	0.399544	0.66262	3.004	0.329056	0.527712	0.741173	2.262	0.302965	0.476518	0.736776
ILL.yheB-BSU09790.39~1172	1.549	0.249898	0.363272	0.707231	1.848	0.288596	0.355677	0.640955	2.419	0.311971	0.460703	0.714386	2.262	0.301444	0.483348	0.745717
ILL.atpE-BSU36860.1~213	1.49	0.325365	0.384536	0.621925	1.372	0.312937	0.331429	0.574011	1.799	0.461	0.492726	0.579299	1.651	0.354333	0.398701	0.603187
ILL.yflK-BSU07650.321~986	2.31	0.230787	0.386613	0.755612	2.137	0.290196	0.417039	0.703012	2.849	0.28627	0.524041	0.789199	3.324	0.28935	0.578587	0.813933
ILL.recO-BSU25280.32~799	1.621	0.272978	0.35514	0.658751	1.678	0.317241	0.400531	0.652914	2.999	0.43129	0.599364	0.688668	2.469	0.3936	0.532694	0.680465
ILL.tagA-BSU35750.60~830	1.565	0.286336	0.359975	0.647524	2.027	0.348628	0.442945	0.653313	3.261	0.520813	0.75802	0.708172	3.032	0.419078	0.599089	0.697948
ILL.rsmB-BSU15740.1~1344	1.468	0.285102	0.359595	0.652599	1.679	0.317022	0.383375	0.634797	2.172	0.344935	0.471557	0.68388	1.914	0.311158	0.413722	0.670784
ILL.albA-BSU37370.1~1347	1.804	0.181198	0.370979	0.823299	2.035	0.205891	0.336984	0.742808	1.976	0.180287	0.354367	0.81093	2.077	0.174453	0.359093	0.824636
ILL.dhbB-BSU31970.1~939	1.854	0.302552	0.375098	0.643042	2.06	0.411019	0.51472	0.650468	4.163	0.517122	0.77727	0.719772	3.548	0.526285	0.852214	0.750343
ILL.yitW-BSU11160.1~309	1.612	0.255071	0.366716	0.703494	1.45	0.249351	0.337998	0.680261	1.919	0.38939	0.514631	0.671273	1.963	0.353175	0.510195	0.709685
ILL.sirC-BSU15630.1~489	1.743	0.234293	0.378683	0.749088	1.206	0.277367	0.32662	0.624953	2.123	0.294773	0.431613	0.705751	1.457	0.274773	0.357517	0.662859
ILL.yuzG-BSU32120.104~244	1.59	0.252756	0.371583	0.712899	1.511	0.331605	0.427985	0.66129	2.087	0.336664	0.481113	0.694209	2.021	0.400345	0.539701	0.681544
ILL.yufM-BSU31530.1~708	1.616	0.314513	0.37847	0.631805	2.583	0.478465	0.584878	0.638631	2.935	0.523162	0.695803	0.672349	3.037	0.491984	0.670378	0.681929
ILL.spxA-BSU11500.1~396	2.046	0.308276	0.380626	0.636337	1.925	0.415579	0.481236	0.613681	1.923	0.397837	0.480283	0.632149	1.888	0.408538	0.458269	0.598526
ILL.nin-BSU03420.2~400	1.702	0.21631	0.376171	0.773517	1.352	0.237059	0.31627	0.673368	1.785	0.20497	0.315524	0.722869	1.54	0.215483	0.335113	0.730287
ILL.rpmD-BSU01340.1~180	1.879	0.273057	0.371108	0.671776	1.489	0.29392	0.384347	0.664422	1.208	0.297364	0.333408	0.598648	1.42	0.362523	0.386494	0.581705
ILL.srfAB-BSU03490.13~10764	2.218	0.281109	0.367439	0.662956	1.93	0.317535	0.376788	0.626322	1.713	0.298261	0.361597	0.633418	2.397	0.328238	0.426119	0.662371
ILL.ymfH-BSU16860.1~1287	1.592	0.280417	0.357364	0.656432	2.063	0.39875	0.482246	0.634437	3.062	0.412168	0.568073	0.684908	2.615	0.403323	0.584343	0.706497
ILL.fruA-BSU14400.1~1908	1.842	0.239778	0.374855	0.735715	2.194	0.364487	0.467065	0.656645	2.508	0.361522	0.556084	0.730117	3.245	0.369749	0.639439	0.769894
ILL.holB-BSU00310.12~1001	1.794	0.297387	0.367296	0.638672	1.524	0.312702	0.398561	0.657619	3.681	0.457556	0.642934	0.688074	2.347	0.368623	0.496893	0.678061
ILL.rplX-BSU01270.38~349	1.302	0.351983	0.351717	0.551933	1.653	0.333659	0.385468	0.608717	2.098	0.462145	0.4654	0.552972	1.573	0.430592	0.433101	0.556476
ILL.fabG-BSU18500.26~742	1.891	0.304392	0.363967	0.619135	1.887	0.352656	0.430864	0.636011	1.972	0.367806	0.43851	0.623516	2.237	0.376973	0.475241	0.643118
ILL.yfmS-BSU07360.14~874	1.695	0.274043	0.367146	0.674939	2.81	0.458509	0.551113	0.628093	4.26	0.588597	0.89746	0.725915	4.363	0.488321	0.788509	0.741219
ILL.rex-BSU12280.151~573	1.689	0.313272	0.365725	0.613849	1.603	0.339276	0.401114	0.62198	2.231	0.406898	0.433523	0.575195	1.671	0.374306	0.397293	0.574857
ILL.ydzA-BSU04240.17~307	1.45	0.250863	0.378083	0.725515	1.206	0.256516	0.322457	0.650034	0.919	0.179798	0.233689	0.662685	1.204	0.200105	0.310168	0.734362
ILL.pdp-BSU39400.30~1331	1.876	0.282113	0.373238	0.669956	1.654	0.340195	0.413486	0.639493	1.981	0.376143	0.483895	0.66043	2.21	0.348205	0.483986	0.688769
ILL.aspS-BSU27550.1~1779	1.635	0.276207	0.36567	0.670877	1.884	0.331551	0.393516	0.6251	1.997	0.341685	0.423018	0.639957	2.169	0.347355	0.442848	0.65501
ILL.iolS-BSU39780.27~959	1.973	0.260887	0.359496	0.684211	1.658	0.321717	0.401585	0.646743	2.072	0.324677	0.453992	0.694947	1.973	0.275655	0.361289	0.666993
ILL.aroD-BSU23080.112~879	1.638	0.292925	0.364638	0.643512	2.33	0.40422	0.500286	0.644642	3.776	0.492689	0.690815	0.691748	2.94	0.411998	0.631592	0.729201
ILL.atpC-BSU36800.24~422	1.433	0.299898	0.359415	0.627887	1.289	0.330357	0.372665	0.60537	1.958	0.387332	0.459321	0.621762	1.748	0.364224	0.44215	0.633782
ILL.ybzG-BSU01389.1~225	1.696	0.305023	0.356346	0.612126	2.394	0.352992	0.42464	0.614839	1.745	0.387984	0.410446	0.570388	1.833	0.387016	0.435335	0.588185
ILL.yeaD-BSU06340.1~1197	1.578	0.256065	0.363556	0.70058	1.822	0.281625	0.368891	0.664425	3.673	0.332108	0.516642	0.724508	2.772	0.348013	0.560522	0.746556
ILL.spoIIIE-BSU16800.68~2437	2.134	0.255332	0.376878	0.712121	1.762	0.292427	0.396415	0.681069	3.077	0.342578	0.591263	0.771326	3.225	0.343527	0.596289	0.772261
ILL.smpB-BSU33600.4~474	1.527	0.277564	0.353489	0.651335	1.57	0.313395	0.362524	0.614049	1.904	0.363734	0.419816	0.612036	2.093	0.308719	0.395399	0.654199
ILL.mcpA-BSU31240.14~1999	1.789	0.307357	0.36646	0.625519	3.145	0.516084	0.641256	0.643916	6.435	0.727297	1.14555	0.734213	6.114	0.591122	0.935434	0.735493
ILL.nagA-BSU35010.13~1203	1.774	0.224255	0.370196	0.756589	1.226	0.244728	0.292691	0.63029	1.659	0.206378	0.313486	0.723654	1.473	0.210007	0.331302	0.738615
ILL.mleN-BSU23560.141~1547	1.647	0.328293	0.367146	0.599051	2.169	0.394661	0.443682	0.598029	2.799	0.564724	0.621807	0.591167	3.491	0.598966	0.692969	0.613844
ILL.yubA-BSU31160.14~1180	1.884	0.249658	0.380351	0.72339	2.293	0.346201	0.484258	0.69105	2.521	0.332826	0.531078	0.74284	3.497	0.353746	0.652928	0.790997
ILL.ypzJ-BSU23328.24~230	1.965	0.242204	0.367791	0.723849	1.807	0.264137	0.393268	0.714939	2.685	0.325755	0.588794	0.788386	2.437	0.286029	0.494271	0.771585
ILL.patB-BSU31440.51~1214	1.543	0.238969	0.358615	0.721557	1.568	0.284472	0.367028	0.661259	1.242	0.233891	0.293682	0.649218	1.562	0.268016	0.37303	0.694533
ILL.yugE-BSU31430.13~273	1.463	0.228125	0.379005	0.759257	1.338	0.22975	0.322522	0.694724	1.83	0.285195	0.406511	0.695193	2.042	0.275945	0.393239	0.692632
ILL.ppnK-BSU11610.9~809	1.756	0.262195	0.374478	0.702274	1.502	0.315681	0.404364	0.659223	2.283	0.356053	0.468805	0.667657	2.043	0.342322	0.457683	0.673504
ILL.ftsY-BSU15950.1~990	2.107	0.279067	0.38172	0.679493	2.164	0.357888	0.431633	0.632365	2.064	0.35054	0.448059	0.647558	1.838	0.337361	0.420486	0.64217
ILL.yvgT-BSU33460.32~640	1.968	0.278568	0.383907	0.686991	1.181	0.216872	0.30038	0.689444	2.013	0.291648	0.40762	0.684283	1.386	0.265676	0.342097	0.661419
ILL.ydjE-BSU06170.1~963	1.776	0.275002	0.363716	0.670298	1.59	0.3389	0.372273	0.593801	2.131	0.372915	0.490904	0.668347	1.747	0.321375	0.40191	0.646824
ILL.yflJ-BSU07660.157~294	1.893	0.191774	0.374213	0.807919	1.599	0.264329	0.423459	0.746742	1.811	0.28051	0.458454	0.752632	2.125	0.286129	0.501589	0.773568
ILL.rapF-BSU37460.18~1163	1.759	0.234814	0.378424	0.74781	1.863	0.297341	0.401024	0.6766	2.518	0.301237	0.529865	0.776934	2.09	0.245141	0.40046	0.747922
ILL.gidB-BSU41000.14~733	1.584	0.291144	0.367551	0.650993	1.761	0.338657	0.429426	0.651694	1.963	0.361036	0.490825	0.682824	2.06	0.368218	0.478215	0.663994
ILL.mleA-BSU23550.4~1323	1.891	0.3028	0.360841	0.623615	2.199	0.403367	0.489246	0.633665	2.873	0.507669	0.578049	0.605557	2.9	0.522924	0.612142	0.616385
ILL.ykuL-BSU14130.134~577	1.405	0.269568	0.36232	0.679431	1.851	0.387188	0.42665	0.594786	2.22	0.39017	0.560753	0.706916	2.957	0.382506	0.577398	0.720406
ILL.ykpB-BSU14440.57~968	1.691	0.256628	0.359889	0.69521	1.921	0.334343	0.426615	0.656315	2.162	0.332409	0.500659	0.721712	3.562	0.400594	0.664335	0.755987
ILL.adcA-BSU02850.35~994	1.62	0.26227	0.365561	0.692117	1.445	0.281852	0.361066	0.658161	2.869	0.316299	0.514271	0.748691	2.292	0.313977	0.53871	0.770695
ILL.smc-BSU15940.101~3661	1.924	0.276398	0.369545	0.675245	1.644	0.323691	0.385338	0.628522	2.104	0.333877	0.43046	0.657867	2.232	0.314749	0.407352	0.660659
ILL.yazA-BSU00350.1~300	1.776	0.278145	0.390551	0.691504	1.552	0.327796	0.392225	0.628087	1.485	0.312171	0.406998	0.666771	1.479	0.243599	0.336793	0.687513
ILL.sboA-BSU37350.29~160	2.023	0.171361	0.398417	0.852481	0.683	0.154472	0.190432	0.641584	1.275	0.185792	0.34597	0.794559	0.807	0.180708	0.248531	0.689059
ILL.ykvS-BSU13810.21~206	1.239	0.31093	0.349938	0.602229	2.033	0.439783	0.53532	0.637663	4.806	0.570009	0.998849	0.773161	2.943	0.468365	0.706373	0.725101
ILL.pyrD-BSU15540.1~936	2.253	0.295837	0.379884	0.648982	1.981	0.389973	0.464858	0.628521	1.754	0.348355	0.42058	0.630331	2.609	0.448762	0.582546	0.665318
ILL.yceH-BSU02940.16~1107	1.798	0.274891	0.364792	0.664733	1.778	0.317127	0.387872	0.638099	1.806	0.32397	0.419923	0.663431	2.266	0.357853	0.49531	0.691485
ILL.rsiW-BSU01740.8~634	1.896	0.298288	0.369074	0.641795	1.866	0.345122	0.398494	0.611536	2.491	0.409234	0.508799	0.640966	2.024	0.319442	0.395953	0.638848
ILL.yqkB-BSU23660.1~324	1.435	0.298218	0.370158	0.647709	1.571	0.321306	0.399265	0.645707	1.983	0.341165	0.482566	0.695066	2.632	0.393282	0.57991	0.714853
ILL.walR-BSU40410.294~1001	2.231	0.260071	0.372488	0.698304	1.573	0.298251	0.370511	0.643559	1.97	0.285069	0.403722	0.697351	2.454	0.287183	0.442528	0.729815
ILL.nagP-BSU02350.21~1916	1.781	0.263797	0.366458	0.689678	1.834	0.282742	0.36423	0.659566	2.829	0.355867	0.530047	0.716772	3.179	0.355208	0.539465	0.722487
ILL.lytE-BSU09420.28~1032	1.851	0.25033	0.362607	0.703957	1.462	0.267038	0.3428	0.656906	2.037	0.344315	0.45634	0.672142	1.906	0.297197	0.38153	0.65586
ILL.panC-BSU22420.1~861	1.919	0.293055	0.371046	0.645907	1.464	0.300553	0.346743	0.612769	2.084	0.377332	0.432546	0.611179	1.908	0.331005	0.404202	0.634744
ILL.qcrB-BSU22550.2~676	2.028	0.284334	0.394668	0.682606	1.659	0.367611	0.421252	0.609545	3.351	0.396243	0.627229	0.732156	2.993	0.407936	0.54731	0.671034
ILL.ydhK-BSU05790.1~618	2.063	0.248072	0.378018	0.720314	0.9	0.313237	0.286491	0.513718	1.022	0.268844	0.282031	0.574238	1.068	0.233174	0.281499	0.633116
ILL.aroK-BSU03150.58~618	1.902	0.22893	0.386654	0.761343	1.972	0.321146	0.439887	0.683383	1.9	0.264166	0.389512	0.708038	1.869	0.28857	0.445462	0.732665
ILL.mrnC-BSU00950.1~432	1.782	0.269052	0.378479	0.694441	1.399	0.303651	0.366571	0.633979	2.136	0.339024	0.496478	0.712887	1.991	0.340448	0.469814	0.684551
ILL.yerQ-BSU06720.71~982	1.905	0.285641	0.372498	0.6644	1.749	0.313263	0.380585	0.634531	1.88	0.327442	0.42054	0.658028	2.259	0.315466	0.401588	0.648385
ILL.yabE-BSU00400.1~1314	1.828	0.249538	0.376016	0.722267	2.058	0.268679	0.428901	0.744578	2.726	0.350931	0.607514	0.774233	2.05	0.280836	0.41751	0.717936
ILL.flgB-BSU16180.62~451	1.392	0.308461	0.357433	0.613554	1.671	0.403583	0.453075	0.603571	4.783	0.771386	1.17254	0.723395	3.641	0.494083	0.657385	0.66984
ILL.buk-BSU24070.1~1092	1.721	0.260862	0.367326	0.692117	2	0.292535	0.374964	0.65354	2.408	0.337707	0.467413	0.68855	1.953	0.312976	0.440225	0.690477
ILL.ylmC-BSU15360.20~265	1.68	0.131526	0.355177	0.891298	1.749	0.159078	0.316095	0.806521	2.133	0.104224	0.297534	0.889008	1.824	0.139578	0.312754	0.844306
ILL.etfA-BSU28520.9~986	1.657	0.287267	0.370006	0.660256	1.691	0.352831	0.430468	0.638403	2.443	0.358389	0.482936	0.677657	3.306	0.416918	0.656263	0.73294
ILL.coaA-BSU23760.20~979	1.847	0.26835	0.362284	0.675301	1.857	0.390731	0.455698	0.618081	2.624	0.395388	0.593967	0.721049	3.17	0.434919	0.673707	0.733241
ILL.ydaO-BSU04320.197~2020	1.894	0.222254	0.370995	0.758247	1.426	0.221926	0.296604	0.674379	1.836	0.240182	0.370061	0.727605	2.143	0.251212	0.395096	0.736233
ILL.mntB-BSU30760.19~771	1.758	0.277709	0.374304	0.678869	1.647	0.333428	0.42341	0.656365	2.6	0.335904	0.51334	0.724365	2.477	0.380743	0.602429	0.739638
ILL.ydiP-BSU06070.1~1170	1.841	0.293189	0.36353	0.644361	1.542	0.301225	0.367165	0.633116	2.504	0.430866	0.526718	0.636179	1.91	0.349441	0.457406	0.667532
ILL.ywdJ-BSU37940.1~1323	1.627	0.255542	0.362518	0.698844	1.515	0.263184	0.351806	0.674479	1.69	0.292729	0.390109	0.674149	2.353	0.320056	0.474478	0.715407
ILL.yxlD-BSU38680.1~207	1.195	0.288388	0.352763	0.638717	1.585	0.420775	0.450968	0.582482	2.153	0.545225	0.638737	0.623591	1.775	0.482963	0.518227	0.583238
ILL.yebG-BSU06410.1~198	1.773	0.187443	0.356459	0.803053	1.796	0.23245	0.373452	0.73587	2.104	0.263626	0.484468	0.79398	1.731	0.193466	0.332178	0.76757
ILL.ywrF-BSU36080.14~631	1.92	0.210167	0.368864	0.773125	1.545	0.229051	0.345165	0.722602	2.135	0.228573	0.40082	0.775421	2.033	0.206582	0.381822	0.790803
ILL.flhO-BSU36400.61~873	1.756	0.295269	0.36498	0.64029	2.04	0.359834	0.492004	0.682973	4.547	0.554443	0.863583	0.730186	4.03	0.555417	0.864471	0.733293
ILL.tkt-BSU17890.1~2004	1.733	0.306617	0.364554	0.625	2.162	0.331532	0.408028	0.639683	2.546	0.387559	0.457968	0.619701	2.754	0.395946	0.46169	0.609879
ILL.yitY-BSU11170.242~1672	1.906	0.264512	0.369409	0.692257	2.307	0.341698	0.465502	0.681447	2.924	0.360986	0.578931	0.74315	3.185	0.410842	0.670412	0.751059
ILL.yfjP-BSU08010.19~882	1.827	0.243239	0.373772	0.728703	2.015	0.318066	0.424079	0.671201	3.576	0.416923	0.730814	0.775886	3.801	0.353963	0.634444	0.776929
ILL.qoxA-BSU38170.276~1241	1.619	0.300726	0.366792	0.634183	1.935	0.354749	0.424621	0.627077	2.199	0.444841	0.526833	0.624155	2.096	0.367925	0.416412	0.602397
ILL.yqhP-BSU24500.40~435	1.499	0.195805	0.357635	0.794052	1.408	0.23851	0.342643	0.704772	1.628	0.256486	0.397464	0.735054	1.684	0.24839	0.411095	0.757134
ILL.ysmA-BSU28420.61~504	2.1	0.274802	0.388822	0.691367	1.68	0.264202	0.366152	0.686781	3.372	0.309178	0.570121	0.779154	2.323	0.258471	0.431795	0.754304
ILL.nagP-BSU07700.12~1370	1.889	0.259879	0.378663	0.706966	1.076	0.215649	0.266438	0.642782	1.33	0.228243	0.287305	0.648712	1.562	0.269835	0.356357	0.671298
ILL.pdhD-BSU14610.1~1413	1.691	0.322248	0.361589	0.596457	2.036	0.32987	0.408691	0.640005	1.78	0.351614	0.389126	0.595718	1.945	0.351284	0.404162	0.607649
ILL.yqeI-BSU25650.1~291	2.053	0.284972	0.405292	0.69509	1.627	0.310695	0.399785	0.657217	2.822	0.524915	0.698962	0.673062	1.911	0.346149	0.416088	0.627765
ILL.ywqI-BSU36200.1~261	1.725	0.2391	0.378711	0.737525	0.867	0.15038	0.197485	0.664051	0.957	0.20446	0.26445	0.664383	0.606	0.136727	0.170587	0.647874
ILL.ywpF-BSU36330.22~432	1.572	0.293923	0.360333	0.638794	2.144	0.401683	0.492687	0.637825	2.502	0.468958	0.597437	0.655906	2.79	0.436592	0.536747	0.634505
ILL.yubB-BSU31150.28~858	1.961	0.264559	0.377	0.696686	1.658	0.328003	0.426187	0.664622	2.79	0.38278	0.551981	0.701552	2.688	0.388585	0.564074	0.70649
ILL.ykaA-BSU12850.174~791	1.796	0.33091	0.368516	0.596222	2.055	0.36918	0.452509	0.637004	3.311	0.519251	0.719844	0.690337	1.919	0.393314	0.466559	0.62501
ILL.mgsR-BSU24770.15~395	1.821	0.237005	0.381864	0.7468	0.891	0.313697	0.265274	0.47948	0.806	0.223839	0.235939	0.577729	1.216	0.267891	0.278295	0.56486
ILL.mntR-BSU24520.1~429	1.3	0.29271	0.359401	0.642765	1.513	0.288147	0.370178	0.658504	2.322	0.423219	0.561146	0.674406	1.631	0.337442	0.412959	0.634376
ILL.rluB-BSU23160.1~735	1.727	0.304171	0.360367	0.622412	1.812	0.379765	0.459685	0.636029	2.52	0.480642	0.617665	0.660335	2.3	0.393398	0.507652	0.661554
ILL.ypbD-BSU23010.17~586	1.626	0.212809	0.364949	0.768789	2.068	0.215104	0.34926	0.745654	2.353	0.328116	0.576631	0.779141	2.201	0.261207	0.472366	0.785419
ILL.metA-BSU21910.73~978	1.777	0.210485	0.369074	0.777305	1.389	0.220706	0.329854	0.721031	2.014	0.227525	0.371474	0.748977	1.865	0.2059	0.33942	0.753377
ILL.ftsE-BSU35260.115~801	2.006	0.310397	0.363802	0.616178	2.31	0.345418	0.417263	0.62686	2.965	0.537003	0.70278	0.66663	3.13	0.537247	0.711056	0.667675
ILL.kinC-BSU14490.190~1476	1.596	0.233087	0.367402	0.740117	1.706	0.259774	0.34693	0.67558	2.312	0.276099	0.442068	0.74342	1.987	0.226046	0.373781	0.754196
ILL.ydgC-BSU05580.30~617	1.928	0.251161	0.363296	0.70402	1.282	0.278618	0.319315	0.60843	2.524	0.366951	0.520542	0.696241	1.653	0.315137	0.446851	0.702734
ILL.ruvA-BSU27740.13~618	1.726	0.246377	0.379805	0.730404	1.64	0.299328	0.385537	0.659611	2.111	0.341113	0.497775	0.711432	2.053	0.302553	0.469774	0.733293
ILL.ezrA-BSU29610.89~1777	1.844	0.293693	0.36277	0.639508	1.853	0.337765	0.408981	0.633219	2.883	0.447353	0.550577	0.636738	2.452	0.409081	0.477232	0.615979
ILL.yloV-BSU15840.6~1667	1.59	0.311827	0.368241	0.624194	1.975	0.364344	0.424425	0.616666	2.681	0.437982	0.536741	0.637806	2.878	0.380641	0.48216	0.648911
ILL.rpsJ-BSU01150.114~422	1.659	0.3248	0.359962	0.590636	1.817	0.342132	0.384835	0.599593	1.878	0.440488	0.424444	0.531743	1.977	0.348844	0.388276	0.587304
ILL.motA-BSU13690.20~832	2.319	0.288985	0.379935	0.66231	2.573	0.448853	0.567434	0.652498	5.093	0.551798	1.02927	0.797358	5.721	0.581823	1.02545	0.775468
ILL.frlR-BSU32560.1~789	1.754	0.209639	0.369836	0.777082	1.495	0.241799	0.349091	0.705757	1.667	0.208123	0.348198	0.758131	1.68	0.228648	0.422121	0.795117
ILL.glyQ-BSU25270.83~970	1.55	0.293379	0.355537	0.633852	1.486	0.342073	0.409244	0.631856	2.072	0.389541	0.441455	0.603841	2.015	0.365707	0.452791	0.641759
ILL.glnL-BSU02450.11~955	1.918	0.245672	0.370461	0.720177	1.589	0.279334	0.368064	0.670042	2.699	0.315645	0.567762	0.785836	2.3	0.283154	0.474129	0.759964
ILL.yqeU-BSU25440.10~780	1.603	0.286851	0.362029	0.648783	2.138	0.316149	0.429596	0.676707	3.031	0.456577	0.659727	0.703903	1.864	0.364449	0.473479	0.664996
ILL.fliT-BSU35320.1~342	1.56	0.288028	0.354279	0.636525	1.662	0.480179	0.485492	0.558275	3.694	0.623084	0.814742	0.659765	2.303	0.440128	0.589666	0.677997
ILL.aspB-BSU22370.23~1204	2.224	0.312618	0.366481	0.611583	1.89	0.340026	0.408885	0.628137	2.216	0.37032	0.42568	0.611078	2.589	0.356388	0.41797	0.612772
ILL.rplP-BSU01230.2~436	1.454	0.345175	0.359221	0.56772	1.658	0.332435	0.36473	0.584233	1.924	0.46248	0.467216	0.549291	1.625	0.40047	0.392646	0.53946
ILL.yopL-BSU20850.2~127	1.825	0.159469	0.359561	0.851589	1.605	0.187623	0.352511	0.792531	2.008	0.226262	0.437177	0.807129	1.919	0.194262	0.376057	0.802769
ILL.yxxE-BSU39280.46~354	1.403	0.211376	0.352102	0.761091	0.804	0.17917	0.213224	0.629178	1.215	0.213836	0.296484	0.683039	0.802	0.129103	0.170635	0.666181
ILL.pyrG-BSU37150.242~1849	1.984	0.297531	0.371301	0.640995	2.034	0.360756	0.441636	0.63767	1.809	0.376073	0.429201	0.607809	2.25	0.401226	0.475632	0.62243
ILL.ycgP-BSU03230.9~1244	1.934	0.216349	0.375188	0.77417	2.18	0.245397	0.405039	0.754128	2.702	0.273665	0.541279	0.81413	2.857	0.248201	0.496829	0.812071
ILL.galE-BSU38860.19~1038	1.915	0.335758	0.368339	0.587765	1.967	0.381305	0.443416	0.616089	2.431	0.465768	0.533715	0.607488	2.815	0.470719	0.521209	0.592882
ILL.ydbL-BSU04510.1~336	2.034	0.219575	0.384702	0.774325	1.328	0.26752	0.376819	0.696198	1.708	0.284157	0.392801	0.686134	1.867	0.26878	0.462058	0.771021
ILL.cspC-BSU05120.86~286	1.813	0.312972	0.386445	0.637629	3.075	0.425887	0.583142	0.663883	3.613	0.772504	0.862921	0.600036	2.885	0.754894	0.849603	0.606931
ILL.sufB-BSU32670.21~1418	1.565	0.299753	0.358296	0.626945	1.985	0.343139	0.416909	0.632696	2.236	0.381982	0.437565	0.603307	1.96	0.364659	0.420123	0.610528
ILL.ybfQ-BSU02330.1~969	1.549	0.292124	0.360302	0.640357	1.653	0.305363	0.379398	0.643725	2.033	0.360277	0.43773	0.634634	2.529	0.392623	0.500344	0.655229
ILL.mntA-BSU30770.108~1028	1.581	0.249432	0.372191	0.720215	2.038	0.321455	0.450924	0.693589	2.834	0.377716	0.596989	0.740189	3.15	0.399292	0.640661	0.741043
ILL.cbiO-BSU01450.128~973	1.717	0.2818	0.363359	0.659383	1.573	0.28414	0.369577	0.662279	2.493	0.399887	0.574678	0.701173	2.942	0.364073	0.550196	0.713505
ILL.ahpC-BSU40090.343~906	1.996	0.265328	0.380954	0.698748	2.726	0.295511	0.504134	0.761443	2.938	0.334384	0.461427	0.681569	2.581	0.317571	0.47957	0.720984
ILL.yqhS-BSU24470.21~467	1.967	0.289461	0.391681	0.679302	1.577	0.333767	0.387118	0.615142	1.947	0.409447	0.470504	0.61259	1.967	0.381058	0.46756	0.638148
ILL.yxkC-BSU38850.20~661	1.721	0.326127	0.371934	0.609214	3.234	0.552239	0.74693	0.677934	5.729	0.860788	1.25729	0.708259	4.198	0.686251	0.944337	0.684392
ILL.tpiA-BSU33920.31~792	2.267	0.284485	0.364729	0.646073	1.718	0.344861	0.40806	0.62261	1.753	0.32177	0.390138	0.6323	1.543	0.3118	0.381888	0.635688
ILL.ypsB-BSU22180.1~297	1.356	0.241951	0.359251	0.720869	1.586	0.356892	0.433171	0.63599	2.035	0.348578	0.503305	0.707746	1.668	0.311514	0.43444	0.694576
ILL.ybeC-BSU02120.30~1649	1.449	0.276878	0.357717	0.662477	1.78	0.34826	0.419234	0.628552	2.938	0.506081	0.68167	0.678082	4.333	0.585087	0.860579	0.710717
ILL.ykbA-BSU12860.37~1353	1.738	0.251114	0.375169	0.720193	1.999	0.293989	0.384166	0.664124	2.23	0.332672	0.433598	0.661437	2.258	0.324972	0.473719	0.708992
ILL.ytbJ-BSU29580.1~1206	2.1	0.259567	0.367308	0.691593	1.562	0.300939	0.374286	0.646764	2.215	0.31828	0.478929	0.720708	2.128	0.285025	0.425085	0.717079
ILL.yhjH-BSU10510.11~538	1.67	0.228257	0.37037	0.747684	1.742	0.290932	0.408308	0.694558	2.698	0.3282	0.570437	0.773072	2.492	0.272989	0.520761	0.803982
ILL.yolB-BSU21530.6~362	1.41	0.278486	0.363836	0.66648	2.048	0.446368	0.574409	0.663568	3.908	0.486454	0.811823	0.758626	2.164	0.428249	0.616925	0.708683
ILL.murG-BSU15220.123~1214	1.789	0.280299	0.367674	0.664857	1.989	0.317945	0.384967	0.627585	2.324	0.374881	0.502717	0.67069	2.082	0.366388	0.486173	0.673831
ILL.yqxC-BSU24260.1~846	1.872	0.28827	0.375841	0.661353	2.026	0.336438	0.424558	0.647632	2.195	0.350423	0.405274	0.605481	1.841	0.337072	0.417603	0.640463
ILL.yulF-BSU31170.14~1000	1.656	0.250141	0.367059	0.712836	1.71	0.321756	0.402876	0.649809	1.966	0.348052	0.467236	0.67799	2.093	0.376976	0.512979	0.683154
ILL.rsbQ-BSU34100.16~825	1.846	0.284745	0.369248	0.660978	2.376	0.420753	0.512221	0.636295	3.378	0.467888	0.644724	0.684319	3.694	0.47337	0.809006	0.769741
ILL.divIVA-BSU15420.8~502	1.454	0.292711	0.365317	0.648282	1.721	0.355309	0.454097	0.656838	2.72	0.430698	0.579975	0.675847	2.299	0.362526	0.475273	0.659975
ILL.yodC-BSU19550.61~669	2.023	0.29952	0.378505	0.645908	1.629	0.335514	0.374275	0.598926	1.571	0.315454	0.358925	0.606724	1.69	0.313708	0.374224	0.622228
ILL.ahpF-BSU40100.14~1543	1.944	0.303901	0.370976	0.635021	1.962	0.346674	0.430828	0.641925	1.91	0.347333	0.409576	0.621999	1.835	0.3292	0.390913	0.62419
ILL.yczO-BSU04039.1~165	1.416	0.285683	0.382225	0.675958	0.652	0.278788	0.220375	0.449837	0.67	0.317423	0.207799	0.371292	0.723	0.233625	0.232263	0.550973
ILL.sppA-BSU29530.109~1116	1.378	0.282604	0.35848	0.655485	1.362	0.313882	0.358308	0.611813	2.001	0.342264	0.413045	0.631583	1.919	0.352571	0.435361	0.641377
ILL.spoIIIJ-BSU41040.1~786	1.388	0.308187	0.354383	0.610481	1.721	0.341335	0.395698	0.61112	2.107	0.387599	0.455466	0.616884	2.529	0.436684	0.487171	0.589996
ILL.pbpC-BSU04140.444~2450	1.958	0.285116	0.375601	0.668363	1.71	0.300672	0.38757	0.661036	2.244	0.332709	0.456836	0.68426	2.249	0.342646	0.480491	0.694401
ILL.apt-BSU27610.6~518	1.342	0.325934	0.366887	0.60288	1.678	0.38584	0.434575	0.601799	1.836	0.355305	0.395013	0.594366	2.225	0.415535	0.47472	0.608862
ILL.ytoQ-BSU29850.39~485	2	0.214959	0.382167	0.779159	1.99	0.228598	0.378304	0.751847	1.795	0.213391	0.34597	0.748612	2.66	0.236686	0.446108	0.797511
ILL.adcC-BSU02860.56~751	1.735	0.225355	0.357309	0.740506	1.47	0.247599	0.338842	0.685536	2.077	0.295145	0.517018	0.778848	1.731	0.262306	0.423927	0.749058
ILL.rplU-BSU27960.14~322	1.555	0.354503	0.355545	0.548141	2.184	0.35704	0.396495	0.587944	1.781	0.437723	0.460779	0.574032	2.211	0.373277	0.416334	0.591429
ILL.yshE-BSU28570.8~412	1.358	0.266588	0.357704	0.680149	1.569	0.337819	0.429431	0.657758	2.44	0.41949	0.575326	0.687687	2.965	0.388775	0.658081	0.765051
ILL.ylbC-BSU14960.1~1041	2.026	0.258374	0.368505	0.693868	2.059	0.298353	0.40456	0.681405	3.978	0.374589	0.631651	0.758833	4.315	0.458432	0.808513	0.775758
ILL.cdsA-BSU16540.1~810	1.966	0.266739	0.387916	0.702305	1.801	0.320215	0.403137	0.64884	2.574	0.383754	0.545823	0.701695	2.216	0.402275	0.505418	0.649636
ILL.hemD-BSU28140.1~789	1.663	0.248588	0.35846	0.705693	1.433	0.286837	0.352726	0.642065	2.44	0.317526	0.481421	0.722669	2.138	0.302276	0.457109	0.722016
ILL.mreB-BSU28030.1~1014	1.546	0.329393	0.361213	0.589653	2.429	0.38723	0.451491	0.61166	2.625	0.504095	0.551535	0.585786	2.419	0.474702	0.492022	0.56392
ILL.dapA-BSU16770.1~873	1.874	0.303037	0.369594	0.634796	1.861	0.361051	0.4216	0.615756	2.355	0.412252	0.489191	0.620765	2.269	0.378112	0.480207	0.6529
ILL.ygaF-BSU08720.22~495	1.717	0.282542	0.375487	0.670327	1.546	0.342942	0.411955	0.632486	2.425	0.398314	0.534567	0.674491	2.217	0.326183	0.447851	0.682791
ILL.yloN-BSU15750.4~1095	1.835	0.285774	0.369557	0.651851	1.623	0.354324	0.403622	0.609436	3.463	0.383444	0.497373	0.654053	2.446	0.363619	0.485253	0.672743
ILL.sufC-BSU32710.95~880	1.695	0.332051	0.366528	0.5898	2.287	0.378493	0.443915	0.612502	2.081	0.4308	0.473448	0.589892	2.294	0.437364	0.492189	0.601944
ILL.yraA-BSU27020.1~510	1.635	0.256812	0.366298	0.701182	1.732	0.278526	0.355565	0.656028	1.186	0.230628	0.29271	0.656069	1.314	0.264214	0.311448	0.621352
ILL.ytcJ-BSU29550.20~1609	1.431	0.262045	0.359222	0.686829	1.534	0.330249	0.392123	0.627269	2.243	0.320474	0.407033	0.649434	3.307	0.400881	0.595193	0.711852
ILL.ydbS-BSU04590.46~525	1.976	0.286641	0.372391	0.658082	1.259	0.250582	0.321939	0.659299	1.735	0.321249	0.379443	0.620416	1.69	0.310751	0.371772	0.625072
ILL.ypqE-BSU22230.65~571	1.568	0.296541	0.355295	0.625344	1.636	0.316263	0.415634	0.670372	2.089	0.385692	0.49752	0.656099	1.731	0.318992	0.423	0.671203
ILL.yefA-BSU06730.256~1635	2.171	0.278799	0.373125	0.673195	1.683	0.28135	0.364924	0.661558	1.608	0.278736	0.350792	0.650586	1.95	0.293354	0.421163	0.703054
ILL.divIB-BSU15240.89~880	1.826	0.27427	0.374816	0.682677	2.081	0.360549	0.447945	0.644309	2.993	0.466285	0.692262	0.717337	2.564	0.360289	0.56182	0.734877
ILL.gsaB-BSU08710.22~1311	1.929	0.29169	0.374116	0.654998	1.947	0.346419	0.429757	0.644937	2.585	0.383118	0.475631	0.641367	2.331	0.384633	0.525148	0.683759
ILL.ydbI-BSU04480.40~1092	2.033	0.270373	0.378641	0.691105	1.707	0.277926	0.356827	0.655217	1.791	0.303106	0.416553	0.686671	2.698	0.360388	0.526548	0.708693
ILL.yerB-BSU06570.1~996	1.584	0.283932	0.363654	0.656997	2.231	0.359121	0.436707	0.634713	2.549	0.477618	0.643591	0.679583	2.729	0.411571	0.555954	0.677376
ILL.rpmE-BSU37070.44~244	1.335	0.299465	0.355078	0.625793	1.313	0.291298	0.347838	0.627111	1.744	0.324596	0.397533	0.635591	1.798	0.315009	0.39785	0.646218
ILL.ywoC-BSU36490.20~589	1.952	0.245493	0.370263	0.716541	1.524	0.330221	0.426316	0.66342	2.629	0.370945	0.610257	0.757187	2.762	0.387338	0.586548	0.722383
ILL.yuzH-BSU31279.167~421	1.969	0.21066	0.387007	0.790292	1.263	0.20401	0.30082	0.714347	1.853	0.272474	0.417385	0.720033	1.818	0.212684	0.367885	0.768692
ILL.yuiE-BSU32050.65~1567	1.578	0.299212	0.365056	0.637517	1.826	0.381754	0.425449	0.599653	2.808	0.433956	0.544917	0.64737	2.44	0.431363	0.568308	0.668638
ILL.ymdB-BSU16970.69~863	1.788	0.279457	0.36601	0.666635	1.951	0.37252	0.452835	0.63596	2.711	0.407812	0.554279	0.679694	2.293	0.377573	0.545834	0.705446
ILL.ywjB-BSU37220.10~534	1.587	0.273115	0.369778	0.680994	1.824	0.329762	0.426227	0.659731	2.302	0.40154	0.516483	0.660103	2.371	0.412992	0.561226	0.682028
ILL.yueK-BSU31750.16~1488	1.81	0.302153	0.359789	0.622873	2.042	0.376467	0.438497	0.617974	2.195	0.453761	0.534805	0.623641	2.382	0.393214	0.509718	0.658961
ILL.rplK-BSU01020.44~469	1.491	0.306922	0.352085	0.60715	1.449	0.293813	0.339025	0.609469	1.923	0.382865	0.416423	0.585242	1.353	0.333013	0.348371	0.567433
ILL.ypjG-BSU22470.1~711	2.093	0.285652	0.384053	0.673782	1.638	0.320533	0.403579	0.652033	2.489	0.32745	0.497993	0.723789	2.566	0.318501	0.497647	0.728463
ILL.spoVG-BSU00490.194~487	1.625	0.222229	0.369521	0.759449	1.773	0.284221	0.39003	0.6795	1.424	0.215928	0.309799	0.702093	1.276	0.215562	0.30515	0.699855
ILL.ysoA-BSU28240.14~1018	1.694	0.259871	0.359681	0.688283	1.858	0.313941	0.424754	0.679944	3.045	0.409037	0.658321	0.744602	3.033	0.362289	0.630261	0.774124
ILL.mnaA-BSU35660.21~1163	1.762	0.269143	0.37379	0.687964	1.811	0.336058	0.399521	0.626535	2.081	0.319883	0.412509	0.659844	2.191	0.336104	0.466662	0.689893
ILL.ymfJ-BSU16880.18~275	1.42	0.2371	0.364916	0.731407	1.474	0.26855	0.331541	0.639281	1.855	0.2962	0.402996	0.672391	1.021	0.24975	0.313855	0.653788
ILL.mobB-BSU14290.1~522	1.474	0.304707	0.367123	0.633782	1.8	0.357655	0.439294	0.641147	1.884	0.390394	0.519004	0.676112	2.817	0.43857	0.599485	0.683084
ILL.yhfK-BSU10260.65~709	1.585	0.303178	0.370299	0.638356	2.048	0.445816	0.517255	0.617885	2.71	0.558014	0.673158	0.633173	2.495	0.471101	0.55743	0.622659
ILL.tsf-BSU16500.102~983	1.819	0.314703	0.363026	0.609177	1.677	0.297487	0.357688	0.628897	1.856	0.36557	0.40275	0.590792	1.721	0.348492	0.361888	0.565705
ILL.slrA-BSU38229.164~322	1.525	0.234732	0.376786	0.74771	1.281	0.210919	0.327016	0.734405	1.442	0.243737	0.383456	0.737489	1.907	0.232024	0.413182	0.78215
ILL.yxkD-BSU38840.30~866	1.975	0.209592	0.377441	0.784738	1.439	0.25451	0.349208	0.6864	2.048	0.292408	0.489826	0.760893	1.725	0.226146	0.368545	0.750284
ILL.ykuI-BSU14090.13~1236	1.785	0.271983	0.3772	0.688127	2.286	0.374639	0.475179	0.650643	2.99	0.427533	0.683601	0.742223	3.202	0.366213	0.52859	0.702967
ILL.rpmC-BSU01240.1~201	1.66	0.28101	0.359719	0.643824	1.569	0.342475	0.382147	0.593857	2.005	0.477323	0.477742	0.54491	1.794	0.447232	0.444715	0.543954
ILL.ndk-BSU22730.6~455	1.696	0.335023	0.373422	0.594518	2.097	0.370556	0.463347	0.636552	2.042	0.507352	0.527241	0.567506	2.223	0.466556	0.523607	0.59505
ILL.ywnB-BSU36620.68~709	1.732	0.280352	0.370795	0.668607	1.499	0.392747	0.401824	0.563527	1.971	0.383547	0.429829	0.598173	1.623	0.346523	0.37529	0.58661
ILL.secY-BSU01360.2~1297	2.025	0.310104	0.366805	0.617616	1.884	0.313199	0.394423	0.640255	1.83	0.437907	0.454847	0.568163	2.035	0.410858	0.446282	0.583901
ILL.yvcK-BSU34760.2~955	1.625	0.239184	0.366722	0.729667	1.559	0.275913	0.379018	0.68606	1.805	0.28937	0.398196	0.685807	2.353	0.290058	0.455658	0.734717
ILL.ynzC-BSU17880.1~234	1.892	0.261593	0.371712	0.698776	1.393	0.307534	0.372323	0.632433	2.5	0.351697	0.583009	0.758154	2.129	0.317887	0.500991	0.738034
ILL.ysfE-BSU28700.173~415	2.01	0.205593	0.37646	0.789602	1.459	0.215752	0.351223	0.75185	2.637	0.303732	0.561506	0.796171	2.735	0.289103	0.521881	0.786018
ILL.pgk-BSU33930.245~1429	1.629	0.28993	0.35779	0.63734	1.933	0.304327	0.384113	0.648481	1.888	0.353132	0.405655	0.609961	1.55	0.312943	0.353576	0.602524
ILL.yrhK-BSU27150.15~305	2.363	0.183967	0.381122	0.826519	2.07	0.322325	0.483582	0.718439	3.36	0.302568	0.65957	0.838045	2.008	0.209399	0.395975	0.801366
ILL.pgi-BSU31350.6~1358	2.254	0.326321	0.365355	0.592814	2.051	0.377267	0.43271	0.609392	1.95	0.409719	0.445638	0.585342	1.912	0.409533	0.432027	0.570254
ILL.yllB-BSU15130.51~482	1.702	0.301333	0.363543	0.625949	1.42	0.28115	0.342904	0.638878	1.92	0.351094	0.466132	0.6725	1.765	0.331179	0.43547	0.670027
ILL.ftsA-BSU15280.1~1323	1.65	0.295679	0.362715	0.638628	1.799	0.331827	0.407168	0.637561	3.037	0.472226	0.580367	0.637349	2.118	0.420296	0.504036	0.628708
ILL.fruR-BSU14380.104~859	1.601	0.227226	0.363551	0.746124	1.531	0.268293	0.356932	0.675209	3.071	0.346007	0.622515	0.783102	2.587	0.334002	0.550283	0.756197
ILL.yycI-BSU40380.1~843	2.03	0.263324	0.374288	0.69675	1.678	0.305132	0.395564	0.659554	2.391	0.362086	0.534026	0.716828	2.23	0.357569	0.514967	0.706059
ILL.lytR-BSU35650.67~987	1.726	0.312328	0.357601	0.609532	1.8	0.353877	0.430912	0.637566	2.144	0.432328	0.510981	0.625255	2.186	0.418198	0.497315	0.622537
ILL.glmM-BSU01770.19~1365	1.557	0.287518	0.362141	0.651009	2.021	0.31118	0.383385	0.639231	2.057	0.332073	0.414796	0.645323	2.313	0.345856	0.420914	0.630944
ILL.glpK-BSU09290.1~1491	2.456	0.307336	0.369034	0.624186	2.643	0.431997	0.50856	0.621002	3.366	0.561124	0.707057	0.649202	4.297	0.641303	0.827758	0.660208
ILL.minJ-BSU35220.620~1813	1.718	0.263203	0.373241	0.697746	2.178	0.360137	0.491302	0.681859	3.367	0.375982	0.65028	0.771072	3.281	0.38279	0.639303	0.76034
ILL.xynA-BSU18840.275~916	1.649	0.254688	0.366421	0.704628	2.251	0.298545	0.432367	0.707032	2.877	0.384237	0.616636	0.747213	2.279	0.325789	0.494223	0.725428
ILL.yttB-BSU30350.61~1254	1.894	0.229684	0.377452	0.752027	2.33	0.313627	0.484648	0.729216	4.094	0.38317	0.691935	0.78289	3.266	0.340031	0.683684	0.819742
ILL.yqaP-BSU26230.10~939	2.189	0.187495	0.366188	0.810536	1.896	0.262734	0.391451	0.715446	2.781	0.225871	0.433482	0.803543	1.482	0.226829	0.349876	0.73139
ILL.yhcB-BSU09020.23~553	1.714	0.27389	0.379657	0.687368	1.351	0.271232	0.336525	0.646932	1.295	0.256308	0.348193	0.682784	1.615	0.305004	0.423418	0.691508
ILL.yhaI-BSU09980.10~351	2.103	0.19142	0.379449	0.810215	1.845	0.176542	0.316315	0.782775	2.868	0.237068	0.513451	0.838779	2.529	0.207595	0.461542	0.839621
ILL.yuxK-BSU31500.21~434	1.55	0.182278	0.365795	0.819976	1.45	0.18656	0.298967	0.739023	1.694	0.189814	0.326445	0.766655	1.752	0.185144	0.317016	0.767939
ILL.yaaD-BSU00110.197~1081	1.825	0.318534	0.363579	0.601817	1.827	0.338525	0.403557	0.625024	3.176	0.468107	0.565205	0.625201	2.255	0.414787	0.498716	0.631567
ILL.ydbM-BSU04520.128~1273	2.055	0.217631	0.363281	0.759677	1.548	0.23175	0.318674	0.685735	1.587	0.222503	0.320996	0.704938	1.393	0.183913	0.29079	0.74134
ILL.yukE-BSU31910.65~358	1.559	0.305418	0.355908	0.612359	0.969	0.179215	0.208022	0.612741	0.826	0.201955	0.205444	0.55843	0.622	0.156768	0.165207	0.572659
ILL.ahrC-BSU24250.98~547	1.333	0.218386	0.348125	0.74522	1.418	0.259826	0.333914	0.65723	1.485	0.293044	0.397534	0.684017	2.108	0.270674	0.409269	0.71967
ILL.aroF-BSU22710.13~1185	1.919	0.308505	0.369877	0.628723	1.673	0.400521	0.459304	0.613279	2.607	0.442762	0.559394	0.652079	2.562	0.446233	0.548518	0.640374
ILL.folD-BSU24310.1~852	1.568	0.291951	0.357626	0.637776	1.448	0.295232	0.352807	0.625081	2.064	0.366244	0.426341	0.615805	1.981	0.321633	0.373609	0.611931
ILL.yitL-BSU11030.34~930	2.234	0.262285	0.373861	0.69821	1.644	0.301365	0.351205	0.615485	1.961	0.303866	0.389244	0.654054	2.383	0.33735	0.44444	0.668373
ILL.yflG-BSU07690.16~765	1.595	0.270494	0.364859	0.676878	1.854	0.384169	0.474129	0.642401	2.245	0.403789	0.534076	0.669282	2.517	0.424721	0.578755	0.683545
ILL.natK-BSU02730.13~969	2.144	0.247985	0.39255	0.737401	2.373	0.329331	0.503163	0.723988	3.27	0.410866	0.712174	0.771101	3.966	0.386899	0.725818	0.798573
ILL.bdhA-BSU06240.263~1303	1.792	0.298087	0.371269	0.643627	2.14	0.441143	0.525825	0.630174	2.209	0.403572	0.499362	0.640957	1.921	0.374938	0.442647	0.620468
ILL.rghRA-BSU33660.15~422	1.935	0.232554	0.370676	0.743576	1.379	0.241906	0.333502	0.687441	1.875	0.257696	0.431582	0.76154	1.588	0.218281	0.351389	0.747437
ILL.flgK-BSU35410.7~1530	1.638	0.290424	0.366103	0.650651	2.065	0.449585	0.525055	0.621733	4.91	0.558878	0.8436	0.720177	3.83	0.52535	0.77476	0.713398
ILL.mntH-BSU04360.56~1333	1.74	0.261605	0.358737	0.684226	1.811	0.341406	0.410299	0.632092	3.062	0.341044	0.442411	0.653196	2.408	0.391903	0.557225	0.700194
ILL.fliM-BSU16310.15~1013	1.741	0.283728	0.367772	0.658665	2.052	0.409804	0.508032	0.645613	3.473	0.48125	0.737521	0.725601	2.848	0.40452	0.605374	0.719449
ILL.hemH-BSU10130.32~964	1.734	0.291798	0.365624	0.648215	1.93	0.3572	0.433001	0.633425	2.256	0.38556	0.473942	0.636942	2.163	0.408272	0.520095	0.655225
ILL.ydiC-BSU05920.1~690	1.851	0.232241	0.365855	0.736594	1.184	0.282329	0.325553	0.613833	1.604	0.251223	0.352435	0.695156	1.558	0.243174	0.361407	0.717522
ILL.rnc-BSU15930.140~889	1.742	0.283136	0.36777	0.659443	1.684	0.316119	0.36901	0.619144	2.137	0.332082	0.440811	0.671842	1.539	0.310895	0.373436	0.630369
ILL.yqgC-BSU25030.1290~1772	2.309	0.240947	0.378224	0.736346	2.572	0.314703	0.465463	0.71316	4.221	0.429891	0.747388	0.769863	3.059	0.355112	0.594591	0.761289
ILL.qoxC-BSU38150.14~628	1.435	0.319935	0.345362	0.579225	1.712	0.386137	0.438227	0.6068	1.855	0.389043	0.413667	0.576482	1.918	0.394495	0.426981	0.581253
ILL.yvaA-BSU33530.88~1164	1.773	0.290323	0.368788	0.654056	1.935	0.403598	0.445466	0.59632	1.561	0.370205	0.434116	0.624646	2.038	0.310212	0.394554	0.653405
ILL.accD-BSU29210.24~896	1.789	0.302477	0.364595	0.626961	1.97	0.355649	0.423237	0.625254	2.172	0.394672	0.465994	0.618752	2.045	0.381819	0.444129	0.61202
ILL.yqkC-BSU23650.13~252	1.535	0.267583	0.378744	0.699391	1.302	0.238806	0.335768	0.693818	1.786	0.325647	0.449898	0.689503	1.235	0.246727	0.3364	0.685354
ILL.lytT-BSU28920.1~726	2.485	0.263761	0.413246	0.727664	1.875	0.326758	0.449391	0.688471	3.239	0.32441	0.630331	0.806559	2.94	0.332182	0.64708	0.81067
ILL.fbaA-BSU37120.71~928	1.859	0.32482	0.368438	0.60213	2.199	0.36744	0.434743	0.620599	1.998	0.477032	0.490251	0.564385	2.239	0.421996	0.461393	0.584844
ILL.atpH-BSU36840.1~546	1.766	0.293526	0.363349	0.639209	1.666	0.347448	0.399082	0.611016	1.949	0.404407	0.448572	0.593947	2.255	0.382511	0.446238	0.612583
ILL.yusO-BSU32870.44~511	1.867	0.276811	0.377031	0.681585	1.46	0.313027	0.395732	0.655127	2.239	0.360477	0.494261	0.686297	2.045	0.342735	0.516511	0.723127
ILL.thiD-BSU38020.15~830	1.85	0.278546	0.378107	0.680415	1.559	0.274079	0.360517	0.669223	1.325	0.255419	0.328179	0.65896	1.782	0.266566	0.360217	0.679329
ILL.yvaP-BSU33680.1~327	1.438	0.27319	0.362929	0.674094	0.971	0.240255	0.296684	0.645838	1.401	0.249235	0.344076	0.689212	1.118	0.233562	0.310063	0.674824
ILL.mraW-BSU15140.1~936	2.127	0.275862	0.362028	0.661533	1.922	0.350574	0.421073	0.628654	2.479	0.420132	0.530483	0.650941	2.602	0.456049	0.603428	0.670635
ILL.yvcR-BSU34700.1~780	1.784	0.242011	0.372336	0.726661	1.53	0.297313	0.378182	0.655742	2.145	0.332437	0.503861	0.723219	1.778	0.280955	0.460625	0.754917
ILL.bkdAA-BSU24050.22~1014	1.656	0.301446	0.360339	0.628629	1.679	0.343827	0.40788	0.627989	3.109	0.447743	0.558629	0.645727	2.093	0.3864	0.480435	0.64489
ILL.yuaD-BSU31040.25~603	1.77	0.236674	0.377633	0.742336	1.322	0.239639	0.313287	0.665974	2.35	0.275189	0.448753	0.745137	1.429	0.229502	0.364701	0.745162
ILL.def-BSU14560.13~567	1.561	0.266761	0.376938	0.696891	1.497	0.261236	0.365862	0.696024	1.386	0.267967	0.363468	0.682961	1.395	0.238166	0.316344	0.672542
ILL.pksA-BSU17080.1~618	1.653	0.266769	0.366216	0.68319	1.575	0.300332	0.389245	0.665259	3.028	0.38641	0.586549	0.718258	2.016	0.298064	0.424905	0.700082
ILL.spoVE-BSU15210.59~1159	1.59	0.272184	0.365157	0.677846	1.312	0.275973	0.338377	0.642616	1.649	0.326718	0.394641	0.631764	2.264	0.334155	0.439638	0.665683
ILL.yhcV-BSU09230.1~423	1.875	0.20854	0.367435	0.77331	1.189	0.229948	0.295285	0.658356	1.445	0.229455	0.329042	0.701166	1.42	0.178362	0.316	0.779012
ILL.ywbO-BSU38250.283~885	1.716	0.210061	0.366667	0.775069	1.515	0.290422	0.377576	0.665806	1.97	0.347534	0.488343	0.698284	1.87	0.296357	0.430417	0.706761
ILL.carB-BSU15520.1~3216	1.737	0.310898	0.36124	0.614396	2.54	0.439801	0.513315	0.617692	2.144	0.390863	0.447647	0.608308	2.448	0.457185	0.560228	0.638679
ILL.yydD-BSU40200.1~1761	1.977	0.228297	0.371589	0.748494	1.979	0.300418	0.404671	0.67472	5.193	0.418814	0.79879	0.799847	2.933	0.338666	0.533159	0.733602
ILL.rpmE2-BSU30700.2~250	1.497	0.249179	0.366773	0.716956	1.432	0.295634	0.365184	0.645296	1.387	0.318149	0.374553	0.62376	1.276	0.27856	0.363705	0.670045
ILL.relA-BSU27600.166~2370	1.766	0.2796	0.366227	0.6652	2.037	0.342622	0.438621	0.656596	2.553	0.413012	0.544575	0.668807	3.239	0.438522	0.608111	0.689274
ILL.ywfO-BSU37600.1~1302	1.884	0.265522	0.366472	0.686977	1.768	0.300199	0.379011	0.649502	2.087	0.312746	0.396548	0.648903	1.793	0.290421	0.365822	0.644768
ILL.ylxS-BSU16590.147~617	1.933	0.335639	0.377964	0.591773	2.136	0.398326	0.446232	0.59685	2.448	0.501956	0.53554	0.576819	2.164	0.456212	0.490128	0.575721
ILL.ohrA-BSU13140.5~430	1.369	0.216327	0.36281	0.764635	1.232	0.223436	0.30591	0.684063	1.794	0.20863	0.310891	0.710269	1.205	0.2119	0.274611	0.662015
ILL.yyaE-BSU40930.51~2054	2.298	0.258751	0.378846	0.708448	1.961	0.333781	0.396872	0.622454	2.32	0.335779	0.517432	0.730465	3.705	0.307929	0.497693	0.745803
ILL.ylaH-BSU14780.57~374	1.981	0.248745	0.396713	0.736111	1.904	0.310644	0.418973	0.675343	2.304	0.414591	0.531178	0.652555	2.509	0.437987	0.570907	0.661987
ILL.rsbP-BSU34110.36~1247	1.52	0.255229	0.360162	0.698012	2.09	0.378489	0.472449	0.64751	3.766	0.403555	0.641109	0.736608	4.211	0.427826	0.729733	0.766304
ILL.yumC-BSU32110.23~1021	1.711	0.283698	0.363161	0.654141	1.586	0.298655	0.366103	0.636615	1.634	0.323929	0.380101	0.618274	2.422	0.322815	0.38924	0.62205
ILL.iolJ-BSU39670.4~876	1.724	0.203658	0.366351	0.784921	1.228	0.217005	0.288087	0.672293	1.981	0.1871	0.338976	0.781131	2.341	0.175856	0.35845	0.818644
ILL.purM-BSU06500.102~1142	1.557	0.225795	0.375832	0.757869	1.953	0.302398	0.4226	0.690372	1.633	0.253816	0.363971	0.701577	1.755	0.230509	0.334339	0.700347
ILL.ysiB-BSU28540.1~777	1.72	0.264628	0.379742	0.705082	1.479	0.290369	0.360894	0.646282	2.316	0.305084	0.48357	0.741319	2.969	0.315723	0.537066	0.765318
ILL.sigH-BSU00980.2~658	1.549	0.280871	0.368597	0.669995	1.655	0.316909	0.394115	0.644209	2.041	0.346882	0.485313	0.694461	1.986	0.299516	0.408523	0.684207
ILL.ypiA-BSU22590.135~1406	1.706	0.287508	0.356191	0.641396	1.882	0.36699	0.438601	0.627288	4.18	0.523607	0.785335	0.7211	2.978	0.434842	0.60501	0.690103
ILL.yneN-BSU18010.72~584	1.861	0.269914	0.362729	0.674938	1.941	0.451876	0.514869	0.610098	4.861	0.622945	1.00052	0.741488	4.765	0.623207	1.06039	0.766673
ILL.yvfV-BSU34050.11~727	1.878	0.288449	0.368327	0.651645	1.392	0.267745	0.318923	0.624906	1.551	0.287508	0.297193	0.564108	1.355	0.271351	0.303048	0.59678
ILL.rbsC-BSU35950.2~970	1.431	0.302039	0.367948	0.638105	1.866	0.34555	0.435755	0.649483	1.966	0.421543	0.469485	0.598753	1.773	0.357751	0.423589	0.625096
ILL.yvoF-BSU34960.3~521	1.59	0.294478	0.366708	0.643513	1.495	0.296446	0.38231	0.661899	1.689	0.363498	0.462192	0.65887	2.301	0.366679	0.479676	0.665313
ILL.clpQ-BSU16150.13~558	1.394	0.334582	0.36695	0.593931	1.897	0.408049	0.464248	0.607251	2.382	0.536852	0.57655	0.582235	3.044	0.487608	0.555358	0.600342
ILL.rnmV-BSU00410.74~634	1.896	0.280773	0.369952	0.664397	1.927	0.312332	0.385165	0.640512	2.714	0.499303	0.696597	0.696496	2.798	0.420826	0.61596	0.71367
ILL.ykrL-BSU13490.4~900	1.703	0.304697	0.373029	0.634922	2.34	0.414735	0.489692	0.618009	2.48	0.516575	0.556344	0.583078	2.467	0.529417	0.581246	0.591894
ILL.ydeS-BSU05320.12~608	1.745	0.252336	0.383055	0.724051	1.798	0.311932	0.413242	0.672305	2.744	0.320004	0.489915	0.72586	2.547	0.319704	0.538817	0.762223
ILL.xseB-BSU24290.1~255	1.5	0.288496	0.367955	0.654848	1.339	0.317787	0.385447	0.636925	3.335	0.441047	0.703254	0.74114	1.913	0.309858	0.431201	0.687999
ILL.rplW-BSU01180.1~288	1.999	0.34116	0.393283	0.598117	1.845	0.371427	0.460653	0.639826	2.498	0.45628	0.506523	0.585066	2.236	0.423227	0.440201	0.563546
ILL.yqdB-BSU26050.37~216	2.643	0.14527	0.413771	0.89752	2.576	0.257196	0.56426	0.844924	2.94	0.256507	0.547258	0.831009	1.513	0.192453	0.362026	0.800239
ILL.pyrB-BSU15490.31~945	1.732	0.292551	0.361952	0.639482	2.548	0.599322	0.651792	0.590125	3.176	0.541561	0.658665	0.633127	2.73	0.492	0.619612	0.648514
ILL.rsbRA-BSU04670.115~939	1.91	0.290628	0.371522	0.652181	1.79	0.326329	0.397386	0.636517	2.499	0.407395	0.519659	0.657619	2.531	0.406562	0.536458	0.67003
ILL.yqeF-BSU25700.9~740	1.593	0.233984	0.373198	0.745152	1.501	0.303751	0.404633	0.675708	2.037	0.292479	0.448622	0.726776	2.023	0.268147	0.461742	0.768809
ILL.ctaB-BSU14880.172~1089	2.099	0.25724	0.37734	0.706103	1.538	0.340976	0.394014	0.615498	2.416	0.375509	0.503255	0.676456	1.88	0.350448	0.464276	0.672527
ILL.gltT-BSU10220.63~1352	1.69	0.315604	0.352705	0.596887	2.031	0.380417	0.429319	0.599684	2.353	0.516939	0.577576	0.599042	2.569	0.514534	0.587188	0.605426
ILL.yvrB-BSU33170.1~1062	1.482	0.207287	0.352682	0.768313	1.573	0.215833	0.286636	0.668605	1.404	0.206532	0.316396	0.728432	2.334	0.226785	0.352573	0.730206
ILL.coaD-BSU15020.5~490	1.694	0.279758	0.366937	0.664421	1.672	0.305605	0.382437	0.646876	2.032	0.312798	0.444123	0.69449	2.155	0.298103	0.438597	0.712033
ILL.yllA-BSU15120.6~1625	1.908	0.2776	0.364114	0.663558	1.916	0.36806	0.45493	0.64499	2.662	0.373344	0.509654	0.684531	2.492	0.381435	0.550182	0.706786
ILL.ybgB-BSU02380.1~276	1.231	0.255979	0.370941	0.709994	1.402	0.246247	0.29893	0.624262	1.275	0.256124	0.356997	0.69352	1.254	0.218588	0.338388	0.73608
ILL.ogt-BSU13540.1~498	1.746	0.223333	0.38026	0.766245	1.349	0.258863	0.353821	0.685054	2.135	0.248374	0.414708	0.758711	2.627	0.250306	0.423529	0.759606
ILL.ymcB-BSU17010.8~1537	1.863	0.279205	0.36692	0.666393	2.961	0.399684	0.458493	0.608646	2.611	0.423148	0.499412	0.619654	2.441	0.381916	0.477332	0.643497
ILL.mgsA-BSU22480.1~414	2.01	0.260068	0.373457	0.693894	1.856	0.356589	0.445865	0.647515	2.209	0.458073	0.553121	0.633704	2.202	0.396635	0.511023	0.654958
ILL.katA-BSU08820.9~1460	2.107	0.2592	0.387278	0.714055	1.361	0.31377	0.340606	0.587956	1.437	0.255658	0.342294	0.673962	1.437	0.264574	0.333683	0.651273
ILL.bdbC-BSU33470.5~421	1.622	0.217155	0.375627	0.772604	1.215	0.230668	0.330241	0.704917	1.386	0.220289	0.29911	0.679633	1.693	0.245706	0.39305	0.744798
ILL.rbsA-BSU35940.1~1482	1.502	0.301521	0.35748	0.624665	2.045	0.385214	0.442151	0.609409	2.551	0.510953	0.572635	0.602409	1.782	0.360842	0.403025	0.599926
ILL.pgm-BSU33910.1~1536	2.149	0.302547	0.364964	0.62885	2.017	0.343693	0.427468	0.643392	2.126	0.365796	0.433607	0.62283	2.018	0.340172	0.385135	0.601912
ILL.dnaJ-BSU25460.200~1327	1.884	0.296145	0.358511	0.629816	1.454	0.312988	0.368956	0.623907	2.026	0.347292	0.422533	0.634561	2.237	0.371982	0.458857	0.641143
ILL.speA-BSU14630.65~1537	1.806	0.233592	0.375105	0.747013	1.456	0.2487	0.328094	0.670992	1.382	0.226688	0.30426	0.67492	1.975	0.272384	0.385762	0.697702
ILL.purR-BSU00470.1~858	1.457	0.290966	0.362332	0.645825	1.723	0.346079	0.40722	0.62078	2.407	0.387759	0.492074	0.648436	2.351	0.393025	0.509758	0.663274
ILL.yrhC-BSU27240.3~233	1.515	0.204724	0.368304	0.788063	1.247	0.180695	0.281109	0.733887	1.741	0.252533	0.390285	0.7265	1.074	0.154943	0.245734	0.741808
ILL.pth-BSU00530.107~673	1.54	0.237553	0.364484	0.729393	1.362	0.269354	0.32783	0.632752	1.397	0.227023	0.285913	0.641147	1.577	0.234627	0.320134	0.677184
ILL.yetG-BSU07150.1~378	1.76	0.258616	0.369187	0.698522	1.554	0.297484	0.395235	0.672143	1.894	0.326316	0.427532	0.660525	2.085	0.366258	0.4953	0.678153
ILL.mdr-BSU03070.68~1606	1.907	0.239051	0.370879	0.734026	1.409	0.257732	0.31146	0.631653	1.623	0.250446	0.336551	0.677003	2.411	0.280886	0.429352	0.722129
ILL.ytnP-BSU29890.81~851	1.566	0.246632	0.369752	0.722446	1.31	0.2442	0.310592	0.656761	2.153	0.276401	0.427769	0.731728	1.82	0.235117	0.33428	0.696966
ILL.icd-BSU29130.1~1272	1.628	0.337783	0.365967	0.586674	2.169	0.418498	0.504644	0.631512	3.356	0.578847	0.660302	0.605071	2.57	0.54846	0.597777	0.588734
ILL.ponA-BSU22320.1~2745	1.865	0.283796	0.365627	0.65701	2.266	0.301042	0.380548	0.650435	2.94	0.367986	0.45928	0.643284	2.822	0.350593	0.449797	0.653035
ILL.metQ-BSU32750.106~1131	1.625	0.292865	0.357684	0.634278	1.717	0.350513	0.43079	0.641713	2.156	0.379696	0.476198	0.646519	2.761	0.341453	0.439172	0.653273
ILL.ysbB-BSU28900.1~696	1.434	0.29674	0.35445	0.62614	2.623	0.481483	0.551659	0.60634	5.76	0.869807	1.20287	0.683697	4.631	0.73855	1.05332	0.697318
ILL.menE-BSU30790.91~1551	1.533	0.223988	0.366384	0.753336	1.514	0.279479	0.355335	0.654457	1.609	0.224895	0.328678	0.709227	1.479	0.228549	0.338158	0.713835
ILL.dltD-BSU38530.1~1179	2.496	0.312339	0.375444	0.628165	1.999	0.348122	0.402519	0.610377	1.863	0.393547	0.451225	0.611498	1.86	0.373245	0.424597	0.60424
ILL.yqiW-BSU23990.18~455	1.635	0.297389	0.365966	0.640183	1.676	0.362459	0.450532	0.647045	1.918	0.445223	0.513662	0.614996	1.968	0.367358	0.443977	0.626575
ILL.pgcA-BSU09310.1~1746	1.963	0.306447	0.370448	0.62705	1.953	0.388204	0.447921	0.614749	2.353	0.437854	0.531765	0.634929	3.153	0.444143	0.543792	0.637293
ILL.sdhA-BSU28440.34~1794	1.757	0.321986	0.363653	0.601353	1.665	0.349431	0.410593	0.623032	2.152	0.388617	0.434774	0.597949	2.004	0.398556	0.434943	0.587982
ILL.pdhA-BSU14580.155~1270	1.804	0.345482	0.359375	0.565941	1.853	0.321379	0.371395	0.605579	2.148	0.447192	0.466351	0.568114	2.531	0.406885	0.424999	0.561512
ILL.mtrB-BSU22770.1~228	1.432	0.294614	0.363758	0.640838	2.145	0.300298	0.44101	0.697207	1.939	0.449816	0.537717	0.631609	1.909	0.340728	0.45793	0.668278
ILL.yhaN-BSU09920.1~2892	1.986	0.245878	0.370496	0.719375	1.775	0.298613	0.389528	0.665096	2.624	0.311736	0.487151	0.735234	2.264	0.27828	0.454419	0.752862
ILL.ynbB-BSU17440.1~1266	1.889	0.258176	0.368418	0.696901	1.714	0.327529	0.409553	0.647098	3.267	0.418798	0.635233	0.723582	2.672	0.391903	0.582687	0.716765
ILL.hemY-BSU10140.1~1413	1.854	0.252977	0.364861	0.704972	1.904	0.347412	0.466095	0.679086	2.562	0.401034	0.580232	0.704665	3.09	0.369118	0.566925	0.727698
ILL.mcpB-BSU31260.13~2001	1.593	0.267214	0.362472	0.6816	2.39	0.432244	0.546071	0.652735	5.505	0.574421	1.05279	0.786904	6.655	0.503878	0.952202	0.797208
ILL.nsrR-BSU09380.9~449	1.648	0.212365	0.369079	0.773979	1.868	0.271393	0.405629	0.720547	1.747	0.244315	0.398004	0.754205	3.11	0.321959	0.541072	0.758926
ILL.yrbE-BSU27770.24~1049	1.967	0.279814	0.36117	0.656059	2.099	0.31093	0.371975	0.625373	2.766	0.462941	0.612203	0.669301	2.085	0.36024	0.467655	0.660652
ILL.nth-BSU22340.19~678	1.877	0.305516	0.368802	0.628932	1.859	0.382962	0.452495	0.622185	2.733	0.416456	0.510053	0.633537	2.2	0.427972	0.548745	0.659338
ILL.dapH-BSU14180.1~711	1.942	0.332986	0.360505	0.58026	1.646	0.335689	0.379558	0.601435	1.73	0.371085	0.416715	0.59553	1.838	0.376835	0.433131	0.609382
ILL.xerC-BSU16140.1~915	2.022	0.247029	0.369817	0.714623	1.777	0.311189	0.404633	0.664475	2.096	0.307102	0.429533	0.691719	1.945	0.354233	0.500984	0.699922
ILL.yjbI-BSU11560.159~557	1.918	0.274799	0.382851	0.688849	2.69	0.389489	0.505223	0.656333	2.952	0.35867	0.564478	0.734802	2.779	0.367341	0.557249	0.722718
ILL.proB-BSU13120.53~1150	1.613	0.285073	0.362026	0.650842	1.457	0.284201	0.333071	0.619129	1.678	0.316307	0.391924	0.642789	2.022	0.337194	0.435732	0.660431
ILL.degU-BSU35490.74~763	1.76	0.293156	0.367256	0.645739	1.701	0.319122	0.372368	0.616143	2.057	0.346222	0.436547	0.647859	1.853	0.342701	0.410734	0.6257
ILL.ywqL-BSU36170.10~726	2.099	0.225442	0.389946	0.767879	1.775	0.210731	0.308318	0.702307	1.516	0.219728	0.309396	0.69441	1.754	0.223272	0.347837	0.7273
ILL.valS-BSU28090.60~2702	1.682	0.293016	0.35972	0.638866	1.724	0.302752	0.350064	0.615739	2.084	0.361816	0.439929	0.635239	1.942	0.366917	0.438649	0.628321
ILL.pbuG-BSU06370.135~1457	1.964	0.2661	0.378664	0.696176	1.443	0.282319	0.346835	0.642546	1.535	0.266612	0.326027	0.635139	1.574	0.285032	0.366785	0.65864
ILL.yokF-BSU21610.35~925	1.521	0.275145	0.366199	0.675506	1.396	0.294992	0.349005	0.626151	2.025	0.327869	0.464296	0.696143	1.53	0.283185	0.365829	0.662241
ILL.treP-BSU07800.43~1455	1.735	0.320564	0.370482	0.611134	2.138	0.359719	0.452799	0.646401	3.085	0.514149	0.563544	0.584324	2.631	0.469608	0.552145	0.617194
ILL.crh-BSU34740.24~281	1.394	0.267197	0.362724	0.682944	1.256	0.264299	0.334038	0.64894	2.232	0.403528	0.536916	0.667086	1.673	0.371346	0.450741	0.636916
ILL.fliZ-BSU16340.13~672	1.622	0.258384	0.366725	0.699446	1.775	0.348896	0.428932	0.639434	2.981	0.40661	0.63866	0.73574	2.393	0.397768	0.578993	0.710787
ILL.wapA-BSU39230.27~7031	2.006	0.297548	0.360517	0.631468	1.862	0.308048	0.365656	0.623722	1.898	0.298771	0.343488	0.609649	2.241	0.277378	0.313466	0.60222
ILL.yhfE-BSU10200.1~1041	1.793	0.2753	0.367365	0.672684	1.678	0.33803	0.408432	0.63464	2.687	0.387192	0.541313	0.691819	2.433	0.380426	0.572475	0.723324
ILL.trmK-BSU25180.90~740	1.33	0.300788	0.345191	0.607315	1.644	0.317978	0.377923	0.622031	2.02	0.41698	0.479585	0.6133	1.976	0.399911	0.463349	0.614909
ILL.ywnH-BSU36560.450~941	1.658	0.232794	0.361761	0.731961	1.947	0.246114	0.38528	0.73663	2.443	0.28768	0.481203	0.758643	3.025	0.336523	0.628738	0.798431
ILL.ampS-BSU14450.11~1243	2.078	0.304645	0.359248	0.619418	2.461	0.421338	0.500262	0.621671	2.768	0.461278	0.595772	0.661856	3.008	0.439922	0.581597	0.668341
ILL.yflH-BSU07680.1~315	1.409	0.287685	0.36185	0.652011	1.704	0.325667	0.408809	0.648964	1.874	0.380125	0.467393	0.640524	1.697	0.356262	0.436044	0.638683
ILL.yneR-BSU18060.18~305	1.576	0.249821	0.374167	0.713869	1.276	0.245371	0.318604	0.665412	2.068	0.375329	0.512397	0.683056	1.801	0.277057	0.419323	0.720584
ILL.cheR-BSU22720.237~1007	1.59	0.293246	0.3623	0.643019	1.969	0.385288	0.460692	0.629969	3.235	0.43058	0.651471	0.723562	4.061	0.423813	0.690485	0.747867
ILL.acdA-BSU37170.1~1140	1.901	0.184072	0.374945	0.821933	1.921	0.228006	0.381541	0.7574	3.426	0.226279	0.499128	0.840937	2.238	0.167047	0.395169	0.861127
ILL.upp-BSU36890.70~699	1.647	0.281121	0.365144	0.663627	1.499	0.296568	0.363371	0.638533	1.351	0.258074	0.301461	0.612923	1.756	0.31792	0.357759	0.601667
ILL.ydfF-BSU05390.2~682	1.409	0.270877	0.356185	0.670294	1.44	0.300054	0.3602	0.630976	2.459	0.364923	0.5239	0.703476	2.172	0.323231	0.454772	0.694203
ILL.yrhP-BSU27100.36~668	1.878	0.241099	0.379	0.735308	2.092	0.351222	0.474317	0.675402	4.17	0.52993	0.853091	0.74571	2.802	0.34214	0.550841	0.747409
ILL.ytzE-BSU30020.88~309	1.454	0.261354	0.361532	0.690453	1.76	0.282417	0.424414	0.723251	2.642	0.366903	0.628213	0.770978	2.393	0.294799	0.528998	0.779412
ILL.yhfP-BSU10320.1~993	1.805	0.265985	0.360547	0.679299	1.835	0.379394	0.453402	0.628508	2.993	0.408978	0.63119	0.72739	3.232	0.392394	0.618845	0.739459
ILL.mlpA-BSU16710.1~1230	1.748	0.285108	0.359568	0.648472	1.74	0.360694	0.414942	0.613212	2.228	0.395495	0.513755	0.664672	2.272	0.375773	0.502704	0.676304
ILL.ylbK-BSU15040.1418~2200	3.074	0.196163	0.38772	0.80909	2.158	0.243088	0.412669	0.761653	4.003	0.261739	0.552914	0.829183	3.132	0.227172	0.507636	0.844912
ILL.ywdF-BSU37980.4~810	1.898	0.269669	0.376392	0.688242	1.602	0.29778	0.349746	0.617189	1.739	0.312349	0.371796	0.624274	2.263	0.316823	0.423147	0.673025
ILL.ydzO-BSU05329.90~275	1.809	0.226992	0.386037	0.766116	1.634	0.240349	0.353667	0.711814	2.473	0.239318	0.460057	0.791719	1.668	0.188155	0.374237	0.810824
ILL.fabF-BSU11340.23~1264	1.725	0.303806	0.364044	0.626272	1.806	0.333749	0.405162	0.633956	2.002	0.349736	0.405372	0.610908	2.369	0.368327	0.439508	0.623689
ILL.manR-BSU12000.32~1978	2.134	0.206345	0.366024	0.780603	0.931	0.151684	0.197069	0.661898	1.095	0.154893	0.197224	0.652583	1.856	0.234964	0.382503	0.753485
ILL.sumT-BSU15610.79~852	1.85	0.23681	0.368994	0.734512	0.975	0.218796	0.270131	0.645276	2.697	0.293135	0.524265	0.781199	1.339	0.225348	0.301874	0.674588
ILL.yqhM-BSU24530.45~881	1.643	0.303653	0.370844	0.635333	1.869	0.393198	0.447667	0.607698	2.4	0.455239	0.55489	0.635667	2.779	0.433039	0.561552	0.657134
ILL.yvcJ-BSU34770.7~894	1.67	0.272542	0.371457	0.682347	1.699	0.326956	0.398825	0.6367	2.282	0.371937	0.487659	0.666006	2.034	0.306348	0.437359	0.703224
ILL.ydzK-BSU04359.64~330	1.628	0.20454	0.377001	0.794746	2.171	0.293845	0.484484	0.755224	2.03	0.243056	0.430183	0.777611	2.543	0.293577	0.584443	0.81867
ILL.yusG-BSU32790.49~285	1.704	0.269306	0.371203	0.685734	1.426	0.270515	0.356252	0.667792	1.476	0.297925	0.374524	0.652036	1.076	0.271343	0.333238	0.642396
ILL.ytpR-BSU29820.16~621	1.774	0.286265	0.36081	0.645889	1.833	0.349918	0.428712	0.637134	3.086	0.447578	0.54845	0.632187	2.597	0.385363	0.483256	0.641713
ILL.ydiR-BSU06090.31~972	1.702	0.298899	0.371668	0.645195	1.981	0.39268	0.459237	0.619232	2.503	0.417181	0.618551	0.71599	1.98	0.419643	0.525845	0.648691
ILL.ykzG-BSU14540.32~241	1.233	0.36308	0.367305	0.559557	1.863	0.42783	0.450223	0.569333	3.141	0.754286	0.858073	0.608133	2.326	0.460964	0.531268	0.610894
ILL.hprT-BSU00680.1~543	1.761	0.329559	0.356845	0.578049	1.613	0.375287	0.427014	0.608764	3.255	0.582566	0.636097	0.584826	2.665	0.48151	0.525755	0.583734
ILL.yugG-BSU31410.22~522	1.699	0.286465	0.366221	0.65255	1.471	0.328492	0.385498	0.62075	1.724	0.36475	0.431401	0.621966	2.274	0.360512	0.439406	0.629806
ILL.udk-BSU27330.7~642	1.62	0.264506	0.361139	0.683895	1.245	0.289291	0.3353	0.617704	1.422	0.282794	0.318534	0.600701	1.275	0.261931	0.308644	0.619779
ILL.yyaB-BSU40980.1~441	1.927	0.204651	0.380311	0.795665	1.659	0.23167	0.383094	0.755419	1.917	0.196939	0.425174	0.840554	1.838	0.158561	0.316385	0.80704
ILL.ytxE-BSU29720.1~729	1.466	0.261038	0.363467	0.693088	1.615	0.301659	0.415215	0.68825	2.201	0.339879	0.500451	0.712782	2.041	0.310638	0.448976	0.706952
ILL.rimI-BSU05930.1~456	1.707	0.268038	0.361029	0.677897	1.426	0.31184	0.372962	0.628872	2.017	0.356972	0.495152	0.69017	2.136	0.328788	0.463936	0.697005
ILL.iolR-BSU39770.62~817	1.552	0.251138	0.366039	0.710579	1.816	0.273945	0.364816	0.672917	1.947	0.303805	0.461356	0.725689	3.023	0.264897	0.439327	0.752422
ILL.yhfQ-BSU10330.8~979	1.819	0.289804	0.360034	0.64043	1.668	0.321666	0.39874	0.643536	1.795	0.3698	0.421129	0.606236	3.264	0.456563	0.582572	0.653423
ILL.srfAA-BSU03480.268~11031	2.137	0.292021	0.367061	0.648473	1.934	0.320729	0.38467	0.630479	2.074	0.329093	0.396086	0.629701	2.247	0.347638	0.431902	0.642784
ILL.spsI-BSU37840.1~741	2.18	0.18656	0.379189	0.82059	1.29	0.22258	0.280763	0.64922	1.498	0.185313	0.334591	0.784578	2.03	0.186786	0.339075	0.785059
ILL.ugtP-BSU21920.1~1149	2.052	0.269447	0.368791	0.683576	1.875	0.297171	0.416277	0.693564	2.563	0.353522	0.485999	0.6863	3.165	0.388066	0.518053	0.672955
ILL.glnR-BSU17450.1~408	1.657	0.309992	0.3807	0.638556	1.681	0.365131	0.440365	0.632782	2.183	0.444496	0.538153	0.633638	1.727	0.316295	0.388097	0.633208
ILL.yxaD-BSU40010.99~530	1.754	0.21547	0.377884	0.773107	1.475	0.284996	0.390396	0.687539	1.861	0.257606	0.406636	0.738361	1.608	0.243888	0.36503	0.717006
ILL.rpmA-BSU27940.13~297	1.694	0.271196	0.36505	0.669091	1.687	0.316826	0.382728	0.623272	1.375	0.304551	0.343554	0.599197	1.733	0.340928	0.378248	0.583705
ILL.ylzI-BSU16299.35~250	1.66	0.316714	0.387636	0.636909	1.359	0.383241	0.446556	0.621003	2.367	0.50525	0.689445	0.67865	2.709	0.442723	0.65787	0.717644
ILL.yetH-BSU07160.10~372	1.502	0.247589	0.36332	0.714261	1.353	0.304964	0.386664	0.657671	2.02	0.396629	0.515738	0.664441	2.07	0.317208	0.475729	0.720837
ILL.ywqF-BSU36230.104~1426	1.967	0.247296	0.374134	0.72084	1.598	0.330906	0.388861	0.62138	1.848	0.294446	0.408006	0.688658	1.681	0.259652	0.369194	0.70049
ILL.ywhD-BSU37520.14~532	1.699	0.230972	0.365252	0.741066	1.509	0.271498	0.345496	0.653437	2.208	0.327635	0.468515	0.702089	2.064	0.315848	0.45308	0.700386
ILL.mfd-BSU00550.5~3538	2.134	0.267565	0.367213	0.684159	1.822	0.338928	0.41181	0.637493	2.359	0.334057	0.431219	0.659977	2.14	0.318032	0.431281	0.680532
ILL.trxB-BSU34790.192~1142	1.594	0.28952	0.360007	0.643168	1.46	0.302039	0.357733	0.626382	2.718	0.378902	0.486728	0.657243	2.184	0.384025	0.488303	0.65469
ILL.hisC-BSU22620.1~1083	1.791	0.268535	0.371098	0.688057	1.943	0.364467	0.451204	0.642411	2.64	0.411028	0.532804	0.661476	2.951	0.422818	0.581563	0.686272
ILL.yitZ-BSU11180.41~535	2.086	0.248559	0.382045	0.728758	1.362	0.263653	0.364272	0.691476	2.074	0.36382	0.531539	0.711257	2.132	0.292419	0.473207	0.74689
ILL.yvcT-BSU34680.17~994	1.965	0.284747	0.371279	0.662467	1.624	0.308939	0.378027	0.637082	1.758	0.322517	0.383579	0.626635	2.027	0.322014	0.412185	0.656363
ILL.rpsO-BSU16680.53~322	1.917	0.338036	0.370815	0.584825	1.749	0.384928	0.45697	0.617995	2.381	0.488861	0.530742	0.580844	1.733	0.387819	0.436751	0.601813
ILL.yybJ-BSU40620.1~657	1.669	0.234333	0.364878	0.736957	2.189	0.305568	0.418305	0.677291	4.474	0.394025	0.742053	0.793791	2.764	0.291003	0.496338	0.760313
ILL.tatCY-BSU05990.1~765	1.79	0.28243	0.366359	0.658198	1.943	0.365515	0.444361	0.634141	2.703	0.424761	0.544674	0.650679	2.806	0.500736	0.647743	0.660935
ILL.ywmB-BSU36770.1~741	1.396	0.258425	0.346375	0.675669	1.607	0.249037	0.318077	0.652144	2.164	0.380079	0.549367	0.708414	1.758	0.318163	0.444094	0.694422
ILL.bglH-BSU39260.1~1410	1.932	0.318619	0.365099	0.608068	1.864	0.338805	0.389268	0.608595	2.05	0.454553	0.480093	0.575834	4.445	0.701757	0.914777	0.667185
ILL.ccpC-BSU14140.1~882	1.593	0.283195	0.362035	0.65548	1.991	0.370421	0.447214	0.632992	2.491	0.410197	0.533869	0.658977	2.783	0.386293	0.51374	0.670762
ILL.rsbW-BSU04720.1~483	1.719	0.285321	0.372062	0.661566	1.56	0.342718	0.384879	0.600448	1.571	0.328803	0.376085	0.608559	1.663	0.286056	0.346652	0.631495
ILL.ywjG-BSU37140.58~579	1.566	0.241034	0.371201	0.73086	1.524	0.280372	0.341418	0.634801	1.737	0.271747	0.370787	0.680519	1.501	0.296882	0.391009	0.669064
ILL.guaB-BSU00090.28~1494	1.606	0.303756	0.360032	0.622831	1.606	0.297667	0.366249	0.638211	2.081	0.295197	0.344387	0.611667	1.698	0.304595	0.357219	0.618689
ILL.mutS-BSU17040.28~2604	1.99	0.257977	0.375168	0.704283	1.766	0.324157	0.409957	0.652499	2.585	0.350342	0.495408	0.696262	2.674	0.304659	0.479008	0.735166
ILL.lipA-BSU32330.119~1015	1.553	0.308556	0.368977	0.629846	1.722	0.369017	0.435906	0.62584	2.414	0.412251	0.512901	0.64514	2.216	0.380603	0.48891	0.658948
ILL.ykvZ-BSU13870.282~1247	1.934	0.238623	0.365016	0.725729	1.868	0.321079	0.433362	0.680913	3.441	0.394849	0.693327	0.774002	3.611	0.343063	0.628867	0.789466
ILL.yhcF-BSU09060.1~366	1.417	0.287609	0.361757	0.650874	1.497	0.319478	0.38486	0.631646	3.109	0.455011	0.678828	0.716077	2.371	0.412016	0.613499	0.719331
ILL.rocE-BSU40330.32~1435	2.344	0.238931	0.392033	0.747065	1.481	0.267702	0.349482	0.665521	2.108	0.266042	0.421875	0.740848	2.393	0.266749	0.463659	0.771895
ILL.gidA-BSU41010.1~1887	1.664	0.280201	0.357638	0.65572	1.763	0.349188	0.409089	0.618666	1.974	0.343501	0.440762	0.656943	2.104	0.352929	0.452165	0.657711
ILL.htrB-BSU33000.150~1526	2.006	0.239455	0.370182	0.731601	1.644	0.275297	0.379539	0.688774	1.64	0.240732	0.368892	0.726013	1.933	0.259773	0.429817	0.756134
ILL.yrdC-BSU26760.11~574	1.936	0.235423	0.37473	0.736837	1.588	0.263082	0.327047	0.643632	2.253	0.283842	0.466692	0.753389	1.61	0.238836	0.376508	0.738251
ILL.yteJ-BSU29520.1~495	1.675	0.264395	0.364771	0.685522	1.294	0.294955	0.357145	0.637054	2.017	0.354013	0.457828	0.661321	1.881	0.339982	0.436015	0.654949
ILL.yvgJ-BSU33360.85~1938	1.803	0.213142	0.373352	0.775807	1.626	0.2276	0.343473	0.722593	1.972	0.227453	0.38393	0.761483	2.709	0.225483	0.436683	0.805507
ILL.yprB-BSU22210.16~1257	1.572	0.21388	0.363465	0.767769	1.379	0.225017	0.318977	0.699135	2.05	0.201592	0.331178	0.750398	1.825	0.192078	0.360584	0.798779
ILL.rplT-BSU28850.1~360	1.669	0.33024	0.37639	0.601986	1.572	0.302246	0.379288	0.646511	1.547	0.294583	0.332631	0.592194	1.637	0.319103	0.35458	0.590627
ILL.purN-BSU06510.1~588	1.433	0.217359	0.368737	0.767589	1.864	0.286108	0.409084	0.698607	1.525	0.25077	0.387607	0.730917	1.594	0.220927	0.334649	0.721869
ILL.plsC-BSU09540.26~625	1.841	0.252258	0.369387	0.709947	1.157	0.246301	0.277965	0.604173	1.372	0.250328	0.312415	0.645519	0.93	0.205702	0.256305	0.649745
ILL.yacL-BSU00890.90~1190	1.65	0.276526	0.364558	0.670148	1.661	0.316476	0.398097	0.649336	2.187	0.388509	0.483348	0.646227	2.619	0.402102	0.588755	0.710223
ILL.hemA-BSU28170.116~1483	1.918	0.290025	0.367186	0.650889	2.283	0.406249	0.476633	0.621873	2.731	0.427241	0.5808	0.678969	2.773	0.433609	0.576794	0.67222
ILL.yxiM-BSU39120.144~1292	1.921	0.259347	0.369987	0.698354	1.591	0.30503	0.380001	0.648188	2.572	0.318834	0.444995	0.689263	2.559	0.312271	0.458616	0.711202
ILL.yozC-BSU19300.14~217	1.779	0.230209	0.396524	0.768591	1.158	0.260165	0.345505	0.676249	1.238	0.244468	0.321891	0.669151	1.048	0.275209	0.314496	0.610578
ILL.yugN-BSU31330.1~405	1.707	0.229638	0.366662	0.7422	1.479	0.240709	0.377457	0.738108	2.41	0.28948	0.545614	0.801257	1.881	0.24275	0.385875	0.740582
ILL.ypjH-BSU22460.1~1134	2.102	0.252174	0.372561	0.710937	1.703	0.291266	0.368823	0.652811	2.443	0.353636	0.511594	0.706219	2.478	0.335846	0.501618	0.71713
ILL.yckB-BSU03380.12~875	2.227	0.252661	0.374276	0.71224	1.505	0.299987	0.374047	0.648365	1.986	0.320599	0.427586	0.674136	2.443	0.339251	0.471928	0.68592
ILL.ydhC-BSU05700.30~704	1.524	0.266815	0.362557	0.683599	1.806	0.351394	0.448597	0.653343	2.993	0.383707	0.54185	0.69275	2.041	0.361418	0.493901	0.685187
ILL.coaBC-BSU15700.78~1298	1.905	0.237548	0.375237	0.737128	2.057	0.292654	0.3679	0.649672	1.794	0.288563	0.416149	0.705686	2.129	0.316348	0.462724	0.709646
ILL.rapG-BSU40300.30~1127	1.996	0.284558	0.370483	0.663087	1.993	0.365322	0.426043	0.618229	3.013	0.407002	0.665275	0.750847	2.504	0.326309	0.498491	0.727361
ILL.rbgA-BSU16050.138~986	2.003	0.293988	0.370061	0.644924	1.889	0.346694	0.416995	0.629925	2.438	0.352858	0.446836	0.650756	2.117	0.390176	0.494159	0.653873
ILL.treR-BSU07820.1~717	2.029	0.31581	0.37379	0.616341	1.575	0.319742	0.381436	0.625268	1.929	0.404843	0.471261	0.619077	1.691	0.358863	0.423292	0.622848
ILL.phoH-BSU25340.1~960	1.768	0.288296	0.360725	0.643346	1.712	0.380889	0.45068	0.626015	2.574	0.471332	0.578423	0.637279	2.66	0.42062	0.512004	0.633236
ILL.kapB-BSU31460.1~387	1.603	0.249208	0.37144	0.718054	1.259	0.303073	0.37308	0.645	1.825	0.310245	0.429464	0.687532	2.233	0.290234	0.447074	0.72851
ILL.yqfS-BSU25130.10~903	1.732	0.283403	0.377298	0.670732	1.663	0.359646	0.439212	0.638434	2.299	0.347523	0.450857	0.659227	2.33	0.344792	0.460699	0.674577
ILL.yokK-BSU21560.1~579	1.929	0.25161	0.378731	0.723142	1.872	0.341243	0.400131	0.613759	3.437	0.366356	0.628654	0.763619	1.787	0.283805	0.421311	0.715952
ILL.ribA-BSU23260.1~1197	1.696	0.28999	0.358764	0.641707	1.515	0.298358	0.366586	0.639822	2.572	0.442278	0.558074	0.651814	1.958	0.36519	0.441915	0.631034
ILL.mtnU-BSU13570.1~780	1.905	0.241286	0.372943	0.730587	2.312	0.343461	0.489204	0.697651	3.762	0.369426	0.692342	0.797055	5.119	0.401981	0.873474	0.834488
ILL.yceF-BSU02920.9~782	1.63	0.273991	0.36283	0.67009	1.489	0.334687	0.410632	0.643479	2.457	0.391175	0.466248	0.620338	2.247	0.40216	0.501133	0.644493
ILL.rpsT-BSU25550.92~358	1.419	0.287092	0.36413	0.653199	2.239	0.326932	0.431303	0.65444	1.595	0.361049	0.4027	0.598369	1.566	0.298777	0.356288	0.623242
ILL.ypoC-BSU22330.1~495	1.629	0.292736	0.381469	0.665373	1.42	0.345251	0.382001	0.597038	1.983	0.365368	0.462446	0.650404	2.3	0.342962	0.456347	0.669894
ILL.nap-BSU05440.76~978	1.877	0.222882	0.370194	0.758523	1.265	0.228366	0.314793	0.689778	1.6	0.209768	0.321513	0.727842	1.712	0.219874	0.346168	0.736833
ILL.tatAY-BSU05980.22~195	1.373	0.305064	0.364948	0.623538	1.568	0.343064	0.413615	0.633081	2.875	0.624798	0.792846	0.653169	2.059	0.52016	0.557792	0.580176
ILL.menF-BSU30830.92~1507	1.608	0.266333	0.355635	0.674381	1.593	0.314848	0.375507	0.6277	2.276	0.347853	0.473732	0.682176	2.047	0.324685	0.43171	0.673038
ILL.ykvY-BSU13860.27~1118	1.743	0.270931	0.366945	0.678223	1.848	0.374441	0.443068	0.626664	1.893	0.357519	0.45389	0.655424	2.182	0.384236	0.533612	0.691642
ILL.yfhH-BSU08530.2~316	1.291	0.227471	0.351836	0.73463	1.433	0.287806	0.361302	0.652274	1.818	0.311047	0.453495	0.712126	1.55	0.254547	0.397368	0.737749
ILL.yqeZ-BSU25390.65~1378	1.657	0.306487	0.361715	0.623234	2.09	0.364099	0.442573	0.633676	3.145	0.487064	0.610107	0.643563	2.44	0.444521	0.555428	0.643286
ILL.yutE-BSU32300.1~435	1.52	0.248848	0.363888	0.712628	1.664	0.290645	0.380532	0.665674	2.173	0.36164	0.498311	0.687182	2.184	0.378687	0.519769	0.683665
ILL.bkdAB-BSU24040.14~997	1.553	0.274504	0.3633	0.671768	1.692	0.337115	0.399623	0.626996	2.369	0.339824	0.4267	0.646922	1.817	0.358945	0.455856	0.655109
ILL.yheG-BSU09730.5~625	1.505	0.265317	0.362487	0.682554	1.847	0.304443	0.403432	0.669706	1.832	0.302892	0.417983	0.68752	2.401	0.352868	0.556641	0.741569
ILL.pheT-BSU28630.16~2430	1.777	0.295706	0.36239	0.636588	1.558	0.336443	0.393041	0.620996	2.511	0.377942	0.463252	0.636151	2.229	0.371693	0.467555	0.649422
ILL.opuAB-BSU02990.2~850	1.66	0.303866	0.361733	0.627014	1.894	0.380319	0.444407	0.618342	3.143	0.448636	0.636711	0.691522	3.286	0.480451	0.652662	0.678425
ILL.ptsI-BSU13910.1~1713	1.876	0.304458	0.362779	0.622144	1.937	0.330087	0.405832	0.637039	2.008	0.364455	0.413697	0.604549	2.207	0.323838	0.3632	0.594472
ILL.yqgY-BSU24780.18~263	1.367	0.260245	0.379965	0.714284	1.764	0.362204	0.44437	0.637784	1.926	0.365194	0.457277	0.641271	2.24	0.407459	0.560549	0.686962
ILL.rplA-BSU01030.80~778	1.723	0.306607	0.368005	0.628196	1.699	0.292651	0.380243	0.660729	2.163	0.403036	0.45058	0.596464	2.021	0.346	0.388375	0.591935
ILL.yvfI-BSU34180.88~747	1.75	0.277208	0.372805	0.676825	2.091	0.336171	0.435239	0.659136	3.747	0.481013	0.733773	0.719875	4.774	0.431561	0.808387	0.79628
ILL.yfhM-BSU08590.1~861	1.929	0.209226	0.369227	0.77988	1.184	0.222522	0.297896	0.675306	1.126	0.193222	0.251763	0.664659	1.934	0.194247	0.343183	0.77704
ILL.ctc-BSU00520.42~656	1.755	0.264969	0.346392	0.656125	1.325	0.274506	0.335246	0.639339	1.284	0.29815	0.333612	0.600968	1.352	0.28192	0.325421	0.61221
ILL.ylxQ-BSU16620.2~304	1.65	0.303315	0.36766	0.631627	1.763	0.301611	0.381043	0.649081	1.683	0.438617	0.511433	0.617745	2.031	0.406228	0.47604	0.610965
ILL.ydjM-BSU06250.16~387	1.797	0.262739	0.385931	0.705981	1.479	0.273477	0.342872	0.64717	1.179	0.270409	0.341517	0.655389	0.605	0.152284	0.167742	0.594836
ILL.ybbP-BSU01750.161~982	1.768	0.256842	0.365824	0.699164	1.513	0.256784	0.342869	0.675369	2.047	0.292989	0.414871	0.696729	2.181	0.301107	0.428102	0.698507
ILL.yjzH-BSU12069.1~195	1.76	0.176859	0.372349	0.831041	1.202	0.170315	0.283148	0.759733	1.77	0.230826	0.381203	0.752389	1.403	0.195772	0.320791	0.751126
ILL.ywaA-BSU38550.141~1232	2.045	0.290011	0.376413	0.661953	2.077	0.325748	0.420359	0.661038	3.268	0.443107	0.645238	0.707043	3.221	0.41438	0.626194	0.721385
ILL.fadR-BSU28550.2~586	1.937	0.279997	0.383446	0.682038	2.174	0.405854	0.514233	0.650839	3.116	0.517482	0.748106	0.708805	3.141	0.493029	0.707688	0.700987
ILL.pabB-BSU00740.17~1429	1.678	0.28311	0.37055	0.666889	1.667	0.342318	0.38726	0.604036	3.102	0.4121	0.598878	0.70555	2.062	0.328696	0.449186	0.684329
ILL.engA-BSU22840.24~1334	1.898	0.306184	0.366912	0.627157	1.757	0.335887	0.395114	0.621599	2.323	0.424033	0.502952	0.624846	2.081	0.412525	0.4951	0.630414
ILL.yweA-BSU37800.86~550	1.727	0.221097	0.366878	0.758048	1.205	0.231587	0.297788	0.657644	1.231	0.211933	0.28777	0.676593	1.157	0.158216	0.211239	0.667481
ILL.asnC-BSU22360.1~1293	1.64	0.305724	0.361503	0.620194	2.004	0.346309	0.415826	0.628004	2.516	0.406991	0.449561	0.586149	2.316	0.369336	0.422004	0.604197
ILL.mmr-BSU37570.1~1401	2.187	0.177421	0.375606	0.832153	2.044	0.199599	0.334882	0.751203	1.777	0.197032	0.379201	0.805495	2.469	0.208103	0.432598	0.825301
ILL.adk-BSU01370.55~708	1.641	0.318484	0.370986	0.611936	1.527	0.325633	0.373012	0.606225	2.106	0.434006	0.469471	0.578106	1.975	0.368292	0.38993	0.570125
ILL.speE-BSU37500.75~905	1.724	0.30255	0.35866	0.616467	1.642	0.311964	0.358526	0.609756	2.018	0.40182	0.445835	0.596291	1.79	0.421452	0.483885	0.613981
ILL.tyrA-BSU22610.49~1164	1.632	0.29772	0.362742	0.637827	1.586	0.338539	0.381703	0.60341	2.508	0.395774	0.490515	0.642333	2.368	0.395436	0.514228	0.662282
ILL.yufK-BSU31510.16~573	1.786	0.223608	0.383565	0.764046	1.964	0.260424	0.396885	0.723609	3.163	0.329025	0.590713	0.774011	2.838	0.33182	0.55156	0.757826
ILL.comN-BSU27660.370~666	1.91	0.228687	0.380587	0.754886	2.335	0.267642	0.439064	0.750208	2.058	0.316681	0.488737	0.735386	2.189	0.274937	0.477341	0.774072
ILL.pyrR-BSU15470.27~572	1.433	0.299059	0.352492	0.620748	1.972	0.401073	0.46087	0.609505	3.278	0.550679	0.66327	0.622367	2.344	0.458157	0.546004	0.6192
ILL.artP-BSU23980.41~808	1.625	0.269903	0.376441	0.692938	1.472	0.316758	0.387448	0.639964	1.837	0.306923	0.431339	0.69576	1.661	0.275862	0.402665	0.711187
ILL.sufS-BSU32690.1~1221	1.662	0.294577	0.360163	0.638689	1.795	0.312272	0.398429	0.652284	2.205	0.36734	0.463605	0.649777	1.967	0.37119	0.463588	0.646697
ILL.yqeY-BSU25400.8~454	1.579	0.313582	0.359451	0.603724	1.894	0.318118	0.38364	0.621664	1.888	0.436009	0.483656	0.598291	1.45	0.352627	0.368073	0.568168
ILL.rnr-BSU33610.19~2358	2.22	0.284742	0.365048	0.655445	1.979	0.333893	0.408328	0.636911	3.178	0.390009	0.518612	0.668766	3.146	0.404164	0.571243	0.697096
ILL.dnaK-BSU25470.1~1836	1.716	0.304687	0.363234	0.624084	1.881	0.318166	0.37953	0.622037	2.132	0.355325	0.399586	0.597209	1.914	0.353124	0.412951	0.615295
ILL.perR-BSU08730.6~443	1.48	0.290855	0.372405	0.660948	1.545	0.299689	0.395113	0.665861	1.096	0.224855	0.269956	0.630532	1.867	0.324851	0.438437	0.675859
ILL.ansA-BSU23580.1~990	2.053	0.336807	0.369166	0.585115	2.151	0.416968	0.474298	0.599928	2.907	0.547643	0.638064	0.614354	3.356	0.572486	0.635439	0.593969
ILL.yphE-BSU22820.155~358	1.651	0.214007	0.373117	0.774275	1.672	0.269289	0.389955	0.702695	3.124	0.293852	0.584629	0.809624	2.481	0.283644	0.530557	0.79246
ILL.lysA-BSU23380.2~1321	1.742	0.278581	0.368039	0.669001	1.611	0.317491	0.397983	0.650309	2.446	0.375354	0.516449	0.6849	2.225	0.351336	0.476867	0.67948
ILL.cheY-BSU16330.26~388	1.694	0.28565	0.376324	0.668629	2.147	0.421961	0.570739	0.680174	3.659	0.657939	0.859645	0.666565	3.128	0.509828	0.698601	0.681878
ILL.yflE-BSU07710.45~1994	1.874	0.30656	0.378782	0.638298	2.077	0.346772	0.412043	0.626678	2.221	0.371292	0.460784	0.640113	2.056	0.359609	0.420195	0.614786
ILL.ykoM-BSU13340.64~528	1.721	0.248657	0.374058	0.72249	1.57	0.295681	0.369068	0.647674	1.507	0.299654	0.377912	0.651541	1.313	0.251839	0.336664	0.676775
ILL.rph-BSU28370.74~811	1.779	0.320517	0.370303	0.613397	1.711	0.387658	0.41115	0.576176	1.976	0.413396	0.478759	0.615321	1.865	0.392254	0.46083	0.619969
ILL.lytG-BSU31120.29~877	2.22	0.232418	0.383497	0.755293	1.723	0.27503	0.379548	0.686455	2.186	0.260218	0.433602	0.755998	2.225	0.260723	0.439189	0.758437
ILL.yvaB-BSU33540.40~675	1.671	0.22769	0.371092	0.753029	1.819	0.307409	0.429832	0.693987	1.672	0.273878	0.392763	0.702784	2.462	0.284107	0.470727	0.754832
ILL.yunC-BSU32360.11~316	1.723	0.209273	0.376811	0.787799	1.151	0.224507	0.346652	0.734925	1.842	0.24232	0.410022	0.764564	1.36	0.233327	0.378795	0.751366
ILL.iscS-BSU27510.1~1140	1.925	0.275381	0.376554	0.680307	2.04	0.302556	0.402883	0.671312	2.329	0.341424	0.439332	0.653994	2.327	0.344762	0.454159	0.667181
ILL.yabQ-BSU00610.1~636	1.561	0.24929	0.36399	0.709098	2.266	0.321226	0.429168	0.673448	2.321	0.346681	0.516932	0.718197	2.691	0.329459	0.524694	0.743052
ILL.dps-BSU30650.1~438	1.317	0.271885	0.359526	0.674019	1.943	0.393957	0.511841	0.667305	1.964	0.423184	0.479736	0.604059	2.119	0.360128	0.45616	0.649077
ILL.purB-BSU06440.1~1296	1.992	0.256319	0.375129	0.711893	1.66	0.32678	0.395425	0.634612	1.634	0.283305	0.363216	0.656481	1.58	0.254452	0.342705	0.675693
ILL.oppD-BSU11460.5~1081	1.888	0.299384	0.376675	0.648811	2.273	0.433114	0.537207	0.644024	4.056	0.569493	0.898057	0.737134	4.151	0.537132	0.859458	0.743044
ILL.yneT-BSU18080.13~420	1.577	0.292764	0.369751	0.652667	1.566	0.32059	0.376092	0.619932	1.803	0.380608	0.466313	0.641542	1.393	0.275821	0.361629	0.667639
ILL.bglP-BSU39270.6~1835	1.958	0.308798	0.376478	0.634596	1.889	0.305688	0.365728	0.621435	1.985	0.433588	0.465625	0.583079	4.976	0.723249	1.04356	0.707344
ILL.sigY-BSU38700.135~671	1.645	0.230068	0.372899	0.749014	1.31	0.235051	0.312776	0.671675	1.696	0.245547	0.397753	0.750064	1.577	0.197819	0.343884	0.774361
ILL.engB-BSU28190.1~588	1.982	0.256256	0.38074	0.715217	1.923	0.295199	0.445046	0.718894	2.43	0.382204	0.566916	0.717137	2.212	0.34328	0.479507	0.693458
ILL.yusP-BSU32880.1~1626	1.964	0.258972	0.375179	0.706381	1.636	0.337061	0.419017	0.647813	2.194	0.338414	0.483733	0.700006	3.379	0.382722	0.630398	0.753594
ILL.greA-BSU27320.77~550	1.655	0.345502	0.361947	0.566426	1.845	0.387451	0.440538	0.601734	2.018	0.442007	0.467968	0.574069	1.993	0.452587	0.472648	0.566828
ILL.yfmL-BSU07430.11~1141	1.654	0.277608	0.370292	0.671397	1.637	0.322012	0.39357	0.63921	2.1	0.349442	0.45867	0.665659	3.09	0.394012	0.57274	0.706974
ILL.ytrF-BSU30410.1~1311	1.939	0.300153	0.367256	0.632623	1.72	0.334473	0.392931	0.621208	2.945	0.453542	0.646238	0.698519	3.934	0.465835	0.731856	0.737579
ILL.yetN-BSU07240.19~1089	2.36	0.230359	0.37434	0.74565	1.68	0.276211	0.385701	0.694276	2.333	0.290617	0.446373	0.727888	2.809	0.284401	0.471004	0.754851
ILL.yoyH-BSU20928.14~193	1.396	0.263768	0.396222	0.720992	1.104	0.299293	0.338119	0.606107	1.32	0.211451	0.302815	0.698051	1.354	0.267927	0.364841	0.683375
ILL.cspR-BSU08930.1~483	1.548	0.27213	0.357453	0.665467	1.557	0.333329	0.420681	0.653372	1.785	0.334775	0.409136	0.636702	1.977	0.327455	0.387219	0.615899
ILL.htrC-BSU40360.1~1203	2.536	0.192024	0.377785	0.811279	1.938	0.22129	0.368774	0.758207	2.443	0.217165	0.42216	0.806926	2.867	0.247842	0.487667	0.81164
ILL.cymR-BSU27520.70~486	1.471	0.321788	0.368278	0.610703	1.621	0.420369	0.442127	0.57458	2.54	0.505386	0.599801	0.624803	2.083	0.479863	0.579294	0.635508
ILL.menA-BSU38490.88~1023	1.686	0.300921	0.364909	0.632577	1.527	0.321345	0.386965	0.631535	2.147	0.410251	0.505245	0.640386	2.326	0.428963	0.546608	0.65186
ILL.tetB-BSU40770.110~1486	1.973	0.221331	0.375038	0.764003	1.715	0.270154	0.377138	0.690962	2.373	0.276771	0.474358	0.770138	1.796	0.235396	0.385252	0.752282
ILL.trpS-BSU11420.59~1051	1.547	0.297664	0.35897	0.629262	1.756	0.344205	0.39761	0.61393	2.6	0.415832	0.507497	0.632945	2.176	0.375238	0.457923	0.631961
ILL.ssbA-BSU40900.1~519	1.834	0.317477	0.374185	0.614995	2.006	0.334505	0.38458	0.599176	2.082	0.405389	0.454115	0.596605	2.015	0.380668	0.413669	0.582116
ILL.rsbX-BSU04740.1~600	1.559	0.243888	0.371267	0.728567	1.357	0.299029	0.361513	0.634129	1.171	0.254997	0.284466	0.598268	1.473	0.231173	0.303417	0.665785
ILL.ykzC-BSU14680.23~451	1.651	0.217915	0.36531	0.762049	1.22	0.229197	0.311239	0.679403	1.754	0.225072	0.365278	0.746045	1.864	0.216444	0.395862	0.791294
ILL.cysK-BSU00730.5~931	1.843	0.294108	0.36231	0.634633	1.603	0.3069	0.380115	0.642056	1.953	0.363382	0.401649	0.592798	1.566	0.281228	0.315238	0.600142
ILL.mrpF-BSU31650.1~285	1.644	0.314782	0.383872	0.63279	1.904	0.358445	0.42714	0.622589	2.84	0.544473	0.722889	0.672291	2.42	0.452891	0.604382	0.674641
ILL.malS-BSU29880.13~1713	1.857	0.248153	0.367498	0.716855	1.721	0.282283	0.382478	0.681209	2.069	0.283761	0.391314	0.685994	2.174	0.283975	0.422269	0.717035
ILL.ytqA-BSU30480.19~987	1.6	0.25501	0.36385	0.697747	1.967	0.339386	0.412	0.635253	1.999	0.3321	0.438132	0.667643	2.776	0.346203	0.53685	0.733059
ILL.yhcS-BSU09200.1~597	1.465	0.210156	0.361438	0.772362	1.582	0.255731	0.372173	0.70997	2.295	0.224571	0.389829	0.764452	1.741	0.178942	0.301644	0.757431
ILL.ruvB-BSU27730.11~1015	1.494	0.275335	0.352896	0.657861	2.34	0.364759	0.452439	0.641372	2.816	0.396829	0.51831	0.661138	2.621	0.370013	0.482775	0.663955
ILL.yjzE-BSU11839.1~255	1.582	0.271396	0.368473	0.680899	0.977	0.345925	0.336326	0.534773	1.074	0.377836	0.36565	0.534644	1.125	0.283172	0.336692	0.628738
ILL.spo0E-BSU13640.38~295	2.019	0.242714	0.386418	0.735782	1.54	0.208278	0.337148	0.750135	1.667	0.290128	0.423874	0.713055	1.279	0.220331	0.318901	0.706593
ILL.rplS-BSU16040.11~367	1.94	0.379359	0.393262	0.559187	1.492	0.346729	0.398154	0.612525	2.467	0.445465	0.456064	0.552973	1.65	0.402076	0.397834	0.54464
ILL.suhB-BSU14670.22~819	1.754	0.274015	0.376516	0.68364	1.592	0.360248	0.427315	0.628671	2.261	0.422561	0.52736	0.643593	2.118	0.369017	0.511296	0.691044
ILL.yfjR-BSU07990.7~867	1.766	0.214618	0.368619	0.771714	1.92	0.236518	0.355636	0.708755	3.082	0.293022	0.526962	0.781304	2.893	0.250478	0.545354	0.839475
ILL.yybR-BSU40540.33~410	1.563	0.269385	0.369241	0.684196	1.938	0.378953	0.429728	0.598804	2.207	0.389469	0.564412	0.705618	1.678	0.287313	0.398563	0.689349
ILL.glcT-BSU13880.1~867	1.708	0.27888	0.372603	0.673925	2.224	0.337572	0.429893	0.656116	3.377	0.387874	0.632168	0.747521	2.925	0.359902	0.566659	0.737834
ILL.pepT-BSU38920.1~1233	1.557	0.256395	0.358748	0.694224	1.71	0.292795	0.382571	0.667172	1.669	0.236406	0.331902	0.694847	2.311	0.302801	0.436579	0.703761
ILL.ypuI-BSU23200.1~540	1.56	0.286833	0.359182	0.648278	1.812	0.361848	0.467693	0.661547	1.811	0.384451	0.444002	0.610707	1.703	0.361724	0.450785	0.648204
ILL.yvrG-BSU33210.1~1743	1.606	0.24528	0.365065	0.717362	1.905	0.287636	0.378525	0.669182	2.519	0.35235	0.575461	0.752445	3.282	0.335378	0.59505	0.778279
ILL.def-BSU15720.8~490	1.411	0.281636	0.351099	0.646711	2.016	0.337199	0.418816	0.639042	2.894	0.454004	0.672867	0.715464	2.294	0.44153	0.557102	0.65289
ILL.sbcD-BSU10640.8~1183	1.704	0.241153	0.375544	0.736	1.795	0.336888	0.439877	0.666452	1.981	0.26971	0.420932	0.735456	2.243	0.281918	0.474523	0.762628
ILL.feuA-BSU01630.1~954	2.035	0.272655	0.36884	0.675325	1.837	0.377719	0.467229	0.644513	3.013	0.486901	0.755525	0.733629	3.464	0.444493	0.71466	0.744071
ILL.yyaF-BSU40920.1~1101	1.986	0.295028	0.361456	0.632268	2.119	0.336784	0.386986	0.605583	2.409	0.423	0.518866	0.637535	2.255	0.393726	0.50136	0.654684
ILL.yobJ-BSU18980.7~849	1.687	0.21861	0.370281	0.766857	1.577	0.236019	0.344195	0.707389	2.87	0.288502	0.551777	0.801643	2.446	0.237573	0.408071	0.764394
ILL.penP-BSU18800.35~955	1.904	0.238479	0.384984	0.745992	1.288	0.264747	0.327875	0.644258	1.805	0.276524	0.408863	0.712777	1.564	0.243034	0.352004	0.707564
ILL.pyrAA-BSU15510.1~1095	1.748	0.317031	0.367111	0.610397	2.409	0.482674	0.575442	0.62945	2.002	0.423826	0.465286	0.592495	2.642	0.463075	0.557333	0.628174
ILL.yckC-BSU03390.24~479	1.699	0.246284	0.357444	0.70633	1.576	0.296042	0.422292	0.705293	2.763	0.386684	0.634988	0.75159	2.589	0.355902	0.568291	0.743554
ILL.yckA-BSU03370.1~681	2.149	0.226338	0.377194	0.752601	1.421	0.250009	0.36114	0.708714	1.679	0.22194	0.358459	0.746714	2.836	0.270571	0.450265	0.755758
ILL.recN-BSU24240.1~1731	1.83	0.2726	0.363379	0.672756	1.776	0.331407	0.388751	0.621534	2.178	0.34668	0.439845	0.651578	2.455	0.340443	0.4687	0.686267
ILL.yqzC-BSU24940.1~465	1.848	0.265272	0.379502	0.695493	1.801	0.318808	0.410299	0.659451	1.707	0.23412	0.328132	0.680418	1.59	0.295776	0.38743	0.663639
ILL.ctsR-BSU00830.135~599	1.668	0.273309	0.366512	0.67369	1.709	0.4047	0.454895	0.602102	2.42	0.308974	0.444623	0.699522	2.774	0.349417	0.523893	0.714403
ILL.ygaE-BSU08700.81~1142	1.827	0.257527	0.365843	0.699093	1.825	0.288296	0.384544	0.670603	2.114	0.329939	0.462248	0.692723	2.381	0.324729	0.496261	0.724781
ILL.tagO-BSU35530.65~1141	1.476	0.265597	0.358878	0.679507	1.687	0.33083	0.415176	0.650698	2.208	0.392364	0.504351	0.658018	2.551	0.423311	0.571641	0.678757
ILL.ywfL-BSU37640.12~857	2.031	0.237543	0.381484	0.74261	1.275	0.256863	0.334096	0.665531	1.517	0.253232	0.345492	0.681027	1.718	0.21254	0.334844	0.736917
ILL.drm-BSU23500.1~1185	1.821	0.291358	0.365766	0.646333	1.827	0.31261	0.381139	0.634918	2.056	0.390214	0.450573	0.610171	1.89	0.360399	0.418932	0.612885
ILL.salA-BSU01540.23~1081	1.797	0.311932	0.358867	0.60886	2.215	0.367551	0.435471	0.623955	2.099	0.455548	0.478174	0.571527	2.24	0.401211	0.457773	0.602276
ILL.yfkI-BSU07890.18~338	1.551	0.215152	0.36456	0.76564	1.083	0.284467	0.304157	0.582201	0.824	0.185109	0.236235	0.660336	1.041	0.184429	0.264222	0.703176
ILL.cshB-BSU25140.30~1346	1.366	0.298639	0.358893	0.632302	1.824	0.355638	0.429739	0.635226	2.352	0.411687	0.48868	0.622515	2.446	0.39449	0.514246	0.6648
ILL.uppS-BSU16530.131~913	1.548	0.312125	0.366201	0.618676	1.787	0.343765	0.380944	0.593892	2.31	0.40369	0.478271	0.622872	1.893	0.37561	0.446154	0.625433
ILL.yvbJ-BSU33880.32~1849	1.96	0.302201	0.365531	0.628079	2.365	0.436316	0.514607	0.623649	3.071	0.459629	0.63698	0.690562	3.52	0.484109	0.676341	0.691398
ILL.rplE-BSU01280.14~553	1.704	0.328176	0.361497	0.583557	1.721	0.34314	0.415217	0.631572	2.093	0.451471	0.464534	0.560197	2.207	0.396007	0.423075	0.569711
ILL.dck-BSU00140.1~654	1.73	0.299144	0.374363	0.646616	2.122	0.321041	0.425772	0.669898	3.208	0.43545	0.669923	0.727675	2.348	0.367603	0.483888	0.66386
ILL.yfkJ-BSU07880.5~475	1.746	0.209683	0.381502	0.785887	1.144	0.22914	0.300221	0.669248	1.053	0.24186	0.298672	0.646066	1.112	0.18938	0.277083	0.711041
ILL.pheS-BSU28640.298~1332	1.74	0.284538	0.362127	0.650763	1.37	0.29378	0.352951	0.631412	1.906	0.341849	0.40239	0.623316	2.204	0.37356	0.485842	0.664593
ILL.cbiO-BSU01460.15~845	1.964	0.274926	0.374541	0.68143	1.717	0.303535	0.385417	0.653923	3.065	0.383341	0.574624	0.718192	2.429	0.392528	0.535201	0.683565
ILL.yhfI-BSU10240.28~762	1.687	0.290494	0.367215	0.644576	2.456	0.4445	0.504564	0.601246	2.625	0.543622	0.59717	0.59044	3.051	0.570267	0.723511	0.651631
ILL.xylB-BSU17610.151~1650	1.897	0.234883	0.368074	0.735841	1.514	0.286096	0.346626	0.634909	2.689	0.310724	0.533173	0.769122	1.93	0.269893	0.404658	0.719081
ILL.dnaG-BSU25210.1~1812	1.911	0.280208	0.360571	0.658371	1.983	0.333038	0.416358	0.646142	2.631	0.406799	0.482472	0.625982	2.254	0.33693	0.418683	0.641561
ILL.ydgF-BSU05620.38~1414	1.961	0.248508	0.370401	0.715041	1.623	0.267494	0.355511	0.67229	2.483	0.306384	0.457356	0.716654	2.332	0.305488	0.478838	0.739056
ILL.yrrN-BSU27350.6~935	1.731	0.296119	0.370748	0.64673	1.416	0.299739	0.344147	0.611359	1.77	0.317162	0.389699	0.637315	1.379	0.282478	0.341124	0.63305
ILL.gntK-BSU40060.1~1542	2.203	0.217419	0.382477	0.775175	1.469	0.218087	0.300852	0.684932	2.609	0.240606	0.426987	0.77741	2.067	0.221301	0.404747	0.788919
ILL.yrkD-BSU26550.222~413	1.617	0.281355	0.367793	0.664877	1.429	0.344365	0.390191	0.60516	2.8	0.502079	0.714441	0.701786	1.912	0.35302	0.491751	0.693358
ILL.folK-BSU00790.1~504	1.57	0.30588	0.378211	0.644382	1.337	0.319752	0.370115	0.616151	1.66	0.38619	0.447774	0.618437	1.728	0.352711	0.420481	0.627547
ILL.ydbO-BSU04540.1~873	2.123	0.223698	0.382043	0.763407	1.497	0.236897	0.325881	0.680883	2.008	0.237881	0.384443	0.747191	2.156	0.245836	0.405987	0.750107
ILL.yphF-BSU22810.1~735	1.51	0.258197	0.372105	0.706451	1.877	0.310954	0.404633	0.658692	2.448	0.33503	0.53981	0.746267	3.267	0.323746	0.54642	0.760163
ILL.rodA-BSU38120.117~1298	1.638	0.267288	0.375591	0.696083	1.374	0.245866	0.32446	0.671621	2.212	0.317705	0.457195	0.702875	2.284	0.293598	0.411742	0.692335
ILL.rbsK-BSU35920.1~882	1.842	0.289613	0.360311	0.637695	1.536	0.340677	0.385541	0.605348	1.692	0.356989	0.409101	0.612196	1.531	0.30569	0.340567	0.593688
ILL.panD-BSU22410.1~384	2.309	0.248537	0.39096	0.732291	1.514	0.300979	0.370088	0.64266	1.608	0.289362	0.412861	0.705841	1.072	0.22808	0.304815	0.678709
ILL.degS-BSU35500.51~1208	1.741	0.282123	0.362426	0.657051	1.382	0.282706	0.362157	0.659375	2.353	0.404405	0.551014	0.683655	2.086	0.357703	0.484094	0.681522
ILL.tyrS-BSU29670.71~1339	1.624	0.273912	0.363358	0.669974	1.542	0.275321	0.343513	0.646046	1.763	0.299649	0.376307	0.64708	1.928	0.304975	0.401203	0.667744
ILL.yvfH-BSU34190.84~1775	2.502	0.220794	0.380113	0.76485	1.765	0.268443	0.383441	0.702765	2.784	0.318085	0.531678	0.759016	4.627	0.311351	0.606553	0.80174
ILL.pabC-BSU00760.1~882	1.899	0.301012	0.371471	0.639503	1.844	0.305904	0.392546	0.654726	2.686	0.380603	0.567164	0.715544	2.453	0.386955	0.512433	0.670082
ILL.gatB-BSU06690.1~1431	1.929	0.290778	0.365821	0.644421	1.761	0.339332	0.4078	0.631804	1.82	0.307105	0.35905	0.615339	1.897	0.337381	0.405158	0.627724
ILL.ywqK-BSU36180.1~465	1.55	0.250577	0.365373	0.708718	1.208	0.244894	0.28781	0.618221	1.747	0.325643	0.441325	0.68303	1.278	0.236247	0.286795	0.634804
ILL.cheB-BSU16420.1~1074	1.664	0.257146	0.365445	0.699764	1.689	0.342938	0.41894	0.639597	3.244	0.363667	0.613526	0.759434	3.186	0.419113	0.651562	0.734756
ILL.cggR-BSU33950.91~1113	1.844	0.251256	0.37212	0.716306	1.898	0.272567	0.39259	0.705155	1.526	0.214272	0.258089	0.626792	1.543	0.196293	0.25111	0.646587
ILL.ybyB-BSU02110.1~261	1.831	0.254766	0.383893	0.720408	0.857	0.349538	0.23626	0.383207	0.718	0.286248	0.223187	0.441529	0.909	0.325724	0.284539	0.493201
ILL.clpX-BSU28220.272~1534	2.014	0.295319	0.370424	0.643954	1.833	0.328052	0.390777	0.625565	2.777	0.428692	0.522447	0.629513	2.362	0.414855	0.500666	0.627806
ILL.yxiI-BSU39160.1~489	1.722	0.246513	0.367888	0.720095	1.274	0.259076	0.328165	0.655015	1.372	0.253496	0.347818	0.685507	1.485	0.247295	0.31938	0.662347
ILL.rplC-BSU01160.28~657	2.03	0.30854	0.366078	0.618155	1.712	0.347059	0.420255	0.633524	2.167	0.497478	0.537327	0.586133	2.198	0.40732	0.443293	0.584085
ILL.yqjI-BSU23860.7~1416	2.234	0.308397	0.374197	0.626515	1.96	0.348617	0.415774	0.624131	2.131	0.385327	0.428586	0.594599	1.861	0.361617	0.396853	0.589464
ILL.yjbO-BSU11620.63~914	2.03	0.265431	0.369794	0.687577	1.511	0.282225	0.357651	0.651357	1.741	0.281126	0.373852	0.666608	1.786	0.25969	0.360837	0.687944
ILL.gatA-BSU06680.9~1466	1.865	0.300917	0.358218	0.624787	1.642	0.312133	0.37418	0.628051	2.042	0.348356	0.414443	0.617741	2.006	0.361661	0.429083	0.621851
ILL.yueI-BSU31770.1~399	1.709	0.280533	0.36483	0.660639	1.473	0.341349	0.403338	0.627109	2.458	0.383699	0.507248	0.667468	2.353	0.371048	0.485134	0.661292
ILL.ydbN-BSU04530.147~326	1.529	0.273931	0.363419	0.672197	1.933	0.359529	0.467561	0.665815	2.734	0.469724	0.641913	0.687073	2.386	0.391264	0.574633	0.712818
ILL.glpF-BSU09280.110~934	1.941	0.315553	0.362046	0.609419	2.54	0.477891	0.559043	0.618328	4.238	0.691419	0.931419	0.676673	3.903	0.552336	0.85793	0.735581
ILL.rsbT-BSU04690.1~402	2.204	0.269693	0.382695	0.687839	1.55	0.336683	0.401709	0.627867	2.082	0.424116	0.513044	0.635179	1.773	0.359613	0.438871	0.632891
ILL.yclO-BSU03810.1~948	1.478	0.305865	0.356712	0.616333	2.029	0.365425	0.432127	0.616831	3.022	0.532402	0.638726	0.627019	3.591	0.57816	0.772554	0.674314
ILL.ylqD-BSU16010.122~508	2.107	0.277302	0.382155	0.679076	1.555	0.310541	0.367221	0.618488	2.779	0.388026	0.544859	0.694542	1.841	0.315996	0.402537	0.651446
ILL.ftsZ-BSU15290.23~1171	1.678	0.295005	0.359857	0.63483	1.738	0.307557	0.372052	0.630911	2.024	0.383448	0.440954	0.61075	2.06	0.381713	0.441819	0.611354
ILL.yrhF-BSU27210.76~444	1.63	0.246863	0.362587	0.713721	1.443	0.275676	0.361029	0.668845	1.491	0.230895	0.317991	0.683773	1.657	0.243708	0.347361	0.696543
ILL.nhaC-BSU09680.34~1395	1.739	0.224462	0.368629	0.753342	1.684	0.253088	0.354664	0.693833	2.422	0.258865	0.396539	0.722403	2.248	0.273859	0.430214	0.738535
ILL.fliG-BSU16220.13~1029	1.589	0.295815	0.365994	0.642024	1.797	0.390211	0.463413	0.627294	3.775	0.554661	0.774241	0.686804	2.824	0.462798	0.657852	0.700239
ILL.obgE-BSU27920.34~1320	1.745	0.327341	0.361994	0.591715	2.146	0.35617	0.431952	0.632597	2.748	0.445714	0.530142	0.621144	2.739	0.471781	0.554004	0.618328
ILL.tig-BSU28230.121~1395	1.903	0.346485	0.362753	0.570479	1.922	0.39767	0.432511	0.586014	2.49	0.487716	0.52706	0.583441	2.432	0.430724	0.461412	0.576901
ILL.ydjO-BSU06270.1~210	1.489	0.340503	0.366927	0.584703	2.408	0.405829	0.5266	0.658727	3.218	0.589834	0.780721	0.673476	3.519	0.659786	0.85011	0.659372
ILL.purH-BSU06520.1~1539	2.11	0.230987	0.378652	0.751482	1.692	0.291094	0.428216	0.714399	1.866	0.237098	0.351379	0.710004	1.541	0.205923	0.323867	0.736678
ILL.ispA-BSU24280.1~891	1.921	0.260303	0.374683	0.703587	1.476	0.285183	0.381466	0.677344	2.309	0.314747	0.442476	0.693367	2.406	0.310766	0.484053	0.731157
ILL.ybfM-BSU02280.1~489	1.312	0.264591	0.344836	0.665134	1.713	0.315782	0.409035	0.660398	2.807	0.462705	0.684531	0.716375	2.543	0.438083	0.62005	0.698175
ILL.hemN-BSU25500.53~1192	1.476	0.228316	0.363914	0.74427	1.383	0.259005	0.329122	0.654448	2.13	0.244788	0.390986	0.742851	2.188	0.252661	0.419662	0.758079
ILL.menB-BSU30800.35~850	1.772	0.30278	0.36116	0.62243	1.8	0.327031	0.386683	0.620951	2.012	0.375241	0.426001	0.602793	1.947	0.373407	0.434084	0.613737
ILL.rsbRC-BSU19450.16~864	1.643	0.225301	0.365649	0.751703	1.641	0.257457	0.363785	0.69961	1.904	0.251054	0.417769	0.758124	2.995	0.231096	0.398359	0.760612
ILL.hprP-BSU34970.1~651	1.351	0.239971	0.349875	0.710607	1.518	0.313767	0.371131	0.625932	1.97	0.288169	0.379363	0.666238	1.884	0.29754	0.404598	0.680922
ILL.yhdR-BSU09570.24~1205	1.443	0.285168	0.366188	0.659787	1.573	0.35959	0.418878	0.619734	2.585	0.423337	0.59315	0.692816	3.119	0.430766	0.663751	0.730494
ILL.yfmC-BSU07520.42~989	1.872	0.300685	0.366913	0.632776	2.064	0.355481	0.426573	0.629935	2.108	0.427228	0.513972	0.63138	2.925	0.444215	0.559941	0.650859
ILL.sinI-BSU24600.103~276	2.256	0.222975	0.385813	0.765911	1.462	0.241274	0.377197	0.737567	1.764	0.274631	0.443195	0.746754	1.721	0.251236	0.375049	0.714037
ILL.truA-BSU01480.1~744	1.695	0.267016	0.364017	0.678545	1.824	0.244029	0.324127	0.667632	1.832	0.297147	0.378999	0.652812	1.696	0.338636	0.416472	0.641265
ILL.hprK-BSU35000.35~967	1.872	0.277994	0.365745	0.665352	1.823	0.331501	0.423501	0.65716	2.877	0.386522	0.511653	0.664536	2.497	0.408446	0.553114	0.682592
ILL.ywtF-BSU35840.133~1101	2.18	0.293202	0.367516	0.643101	1.594	0.304663	0.370296	0.63396	2.851	0.402302	0.489176	0.631387	2.596	0.409837	0.516272	0.645745
ILL.ylbN-BSU15070.145~663	1.805	0.304435	0.363938	0.62601	2.381	0.370204	0.446428	0.625446	3.406	0.507508	0.621546	0.633132	2.066	0.408429	0.476388	0.613148
ILL.gerE-BSU28410.116~340	2.076	0.218223	0.397336	0.781002	1.464	0.221059	0.33309	0.724969	2.305	0.259949	0.45213	0.772931	1.813	0.199696	0.339339	0.763668
ILL.ytgP-BSU30050.22~1656	1.941	0.271685	0.374214	0.684548	1.917	0.3257	0.392107	0.628977	2.633	0.379935	0.520199	0.67818	2.69	0.400552	0.569528	0.698844
ILL.yuxO-BSU31670.1~381	1.83	0.230888	0.373019	0.7478	1.37	0.271385	0.349433	0.663192	1.366	0.273117	0.342315	0.648624	1.326	0.222832	0.319332	0.697282
ILL.artR-BSU23960.1~723	1.685	0.239688	0.36895	0.727311	1.698	0.304173	0.406352	0.676012	2.503	0.267612	0.428759	0.740533	2.274	0.280478	0.468963	0.759146
ILL.thiL-BSU05900.181~1158	1.737	0.267356	0.366296	0.681129	1.495	0.319549	0.362095	0.606953	1.782	0.319205	0.407078	0.65469	2.305	0.308628	0.421483	0.682415
ILL.rnjA-BSU14530.1~1668	1.794	0.298545	0.362711	0.630628	1.866	0.32393	0.391623	0.631752	1.845	0.342934	0.394005	0.612342	2.211	0.379299	0.433147	0.606068
ILL.ndoA-BSU04660.5~355	1.654	0.328927	0.374573	0.60749	1.786	0.303655	0.392765	0.650377	1.862	0.383158	0.459039	0.630963	1.832	0.429	0.455732	0.575866
ILL.radA-BSU00870.84~1460	2.003	0.271542	0.382538	0.694941	1.555	0.293599	0.376936	0.658728	2.182	0.315969	0.482341	0.727466	2.447	0.324146	0.540462	0.759302
ILL.spcB-BSU23210.1~594	2.45	0.278847	0.380169	0.674002	1.663	0.333054	0.395754	0.625926	2.944	0.398414	0.567041	0.696629	2.16	0.323134	0.43848	0.680611
ILL.yjbC-BSU11490.6~584	1.814	0.274508	0.371257	0.674694	1.794	0.313701	0.389833	0.641715	2.367	0.381648	0.524891	0.687221	2.22	0.358932	0.477165	0.671073
ILL.panB-BSU22430.117~950	1.553	0.275021	0.360325	0.666257	1.323	0.281981	0.331087	0.622145	1.404	0.247355	0.285727	0.60838	1.76	0.276451	0.325277	0.617644
ILL.cheC-BSU16450.10~639	1.476	0.252505	0.35804	0.698284	1.672	0.3941	0.47317	0.633597	3.341	0.436441	0.696739	0.742491	3.78	0.440867	0.663575	0.717831
ILL.frr-BSU16520.1~558	1.6	0.298672	0.369275	0.639673	1.822	0.36414	0.417838	0.603344	2.184	0.394753	0.471586	0.627257	2.091	0.40486	0.460791	0.607173
ILL.ycnI-BSU03940.13~627	1.761	0.224624	0.371117	0.755472	1.13	0.230006	0.283511	0.642903	1.589	0.221143	0.315441	0.697167	1.497	0.22636	0.332365	0.714023
ILL.tagE-BSU35730.161~2182	1.751	0.279284	0.370575	0.672736	1.831	0.322478	0.401596	0.64511	2.915	0.422944	0.601974	0.698857	2	0.329311	0.43292	0.668778
ILL.rpsU-BSU25410.11~184	1.434	0.362406	0.360629	0.54749	1.382	0.352938	0.383432	0.587532	1.598	0.485771	0.456855	0.525762	1.265	0.387688	0.385692	0.547798
ILL.yugK-BSU31360.104~1276	2.221	0.2334	0.381655	0.751901	1.493	0.253217	0.329506	0.663178	1.458	0.230527	0.326706	0.698838	1.79	0.237183	0.389681	0.753781
ILL.ysnA-BSU28360.1~597	1.536	0.261095	0.356829	0.681983	1.587	0.312123	0.367899	0.622023	1.614	0.303222	0.36936	0.636491	1.84	0.322307	0.421738	0.663105
ILL.sinR-BSU24610.2~337	1.832	0.234563	0.371188	0.731763	1.583	0.290345	0.430783	0.720022	1.543	0.248761	0.375292	0.719416	1.663	0.266574	0.402393	0.725018
ILL.gntP-BSU40070.1~1347	1.707	0.228163	0.374642	0.753225	1.447	0.238244	0.309255	0.659019	2.212	0.245913	0.37276	0.719164	1.937	0.240386	0.38852	0.748621
ILL.ylbL-BSU15050.1~1026	2.014	0.260641	0.372192	0.701279	1.709	0.341737	0.436564	0.657476	2.794	0.353746	0.533675	0.717913	2.966	0.378554	0.549774	0.708708
ILL.pckA-BSU30560.27~1610	1.699	0.265852	0.359533	0.678696	1.851	0.353231	0.426892	0.634263	3.19	0.439978	0.67252	0.726512	3.736	0.455285	0.744675	0.7516
ILL.rpsN-BSU01290.23~208	1.327	0.284152	0.348894	0.635741	1.31	0.253111	0.288138	0.60106	1.109	0.304535	0.311574	0.562413	0.984	0.356283	0.30861	0.490274
ILL.yclJ-BSU03750.19~702	1.996	0.22974	0.388384	0.759045	2.275	0.262918	0.373739	0.690613	2.9	0.283369	0.499932	0.773762	3.124	0.248755	0.467927	0.789944
ILL.yabP-BSU00600.79~381	1.618	0.253116	0.367247	0.710588	1.625	0.32578	0.398662	0.638624	2.914	0.379329	0.661937	0.774885	1.789	0.356607	0.508519	0.703095
ILL.exuR-BSU12370.24~1025	1.804	0.245473	0.380299	0.731581	1.85	0.262746	0.391076	0.714858	3.031	0.314111	0.572662	0.787678	2.809	0.2884	0.516616	0.782855
ILL.nrdE-BSU17380.1~2103	1.662	0.277449	0.365757	0.668157	1.558	0.298187	0.353491	0.625589	1.978	0.306372	0.400348	0.663677	2.004	0.306197	0.41066	0.675828
ILL.yycJ-BSU40370.22~816	1.923	0.257815	0.371097	0.703325	1.704	0.299776	0.395558	0.670919	1.453	0.298274	0.379942	0.657507	1.982	0.295451	0.421977	0.700719
ILL.cwlO-BSU34800.178~1599	1.871	0.316473	0.364886	0.608295	2.08	0.385226	0.467076	0.631061	2.936	0.573888	0.661227	0.613291	2.674	0.504409	0.574583	0.609124
ILL.rpsP-BSU15990.1~273	1.689	0.311391	0.370518	0.623085	1.349	0.276109	0.316858	0.607501	1.824	0.32979	0.377646	0.60385	1.682	0.330594	0.354561	0.577406
ILL.spo0M-BSU08760.31~807	1.758	0.318749	0.369439	0.610551	2.506	0.388805	0.436933	0.591272	2.461	0.526155	0.586689	0.596859	2.4	0.441369	0.475515	0.581246
ILL.yusV-BSU32940.115~942	1.66	0.315104	0.361249	0.607877	2.251	0.369084	0.450051	0.635003	2.833	0.519649	0.659371	0.651673	2.7	0.489722	0.613451	0.643806
ILL.rpsA-BSU22880.25~1173	1.699	0.327454	0.365108	0.596628	1.902	0.399436	0.462387	0.612616	2.66	0.460732	0.513666	0.595734	1.901	0.406054	0.460188	0.606113
ILL.ispF-BSU00910.1~477	1.37	0.320905	0.359832	0.602153	1.513	0.357658	0.407775	0.610974	2.358	0.476456	0.568322	0.628166	2.953	0.525171	0.69357	0.670418
ILL.ylxX-BSU15260.23~730	1.484	0.29629	0.368573	0.646037	1.452	0.324495	0.375404	0.616163	2.385	0.385465	0.518395	0.676055	2.7	0.375819	0.495886	0.665115
ILL.pbpA-BSU25000.48~2198	1.921	0.300869	0.369846	0.63586	1.91	0.369958	0.434983	0.623258	2.489	0.429698	0.554493	0.661305	2.814	0.413136	0.517474	0.645768
ILL.ycgT-BSU03270.34~1044	1.814	0.23565	0.362995	0.731233	2.325	0.31294	0.433737	0.686289	2.87	0.351425	0.557887	0.739772	3.677	0.392788	0.671826	0.766604
ILL.deoR-BSU39430.35~976	2.008	0.219094	0.379404	0.770024	1.584	0.270775	0.378473	0.690462	2.347	0.259318	0.45173	0.772889	2.49	0.275414	0.52979	0.806465
ILL.sigX-BSU23100.38~622	1.759	0.261485	0.364221	0.684818	1.695	0.308867	0.386095	0.643775	2.776	0.375816	0.541788	0.699064	1.967	0.31056	0.454859	0.711657
ILL.ribH-BSU23250.33~497	1.678	0.250582	0.364528	0.707604	1.486	0.303823	0.385473	0.65561	1.669	0.320092	0.415384	0.660633	1.508	0.308799	0.419532	0.684558
ILL.sufD-BSU32700.18~1331	1.877	0.309497	0.361721	0.615425	2.23	0.363461	0.424936	0.615661	2.374	0.440984	0.511157	0.61247	2.075	0.416539	0.478743	0.608973
ILL.ywaC-BSU38480.54~686	1.613	0.279386	0.367747	0.667098	1.333	0.306317	0.333307	0.588361	2.338	0.375026	0.50438	0.672176	1.844	0.287683	0.401513	0.691806
ILL.yyzM-BSU40939.7~213	1.631	0.266768	0.376508	0.697186	1.186	0.250778	0.307816	0.636784	1.531	0.299293	0.407537	0.681339	1.318	0.245737	0.322442	0.658053
ILL.ksgA-BSU00420.1~879	1.705	0.279667	0.374108	0.672778	1.637	0.354355	0.429609	0.63712	1.997	0.346946	0.469294	0.678893	2.978	0.35395	0.528618	0.716912
ILL.yrkL-BSU26470.1~525	1.73	0.243333	0.363926	0.717086	1.522	0.340278	0.39415	0.616601	2.632	0.349012	0.574268	0.75466	2.574	0.328359	0.524784	0.74079
ILL.rpmB-BSU15820.77~265	1.963	0.169864	0.355147	0.832843	2.586	0.183406	0.408202	0.84003	1.872	0.228834	0.433215	0.804589	2.616	0.19251	0.418025	0.836904
ILL.truB-BSU16660.82~1011	1.704	0.271275	0.356745	0.66763	1.869	0.34326	0.41856	0.632993	2.598	0.353671	0.501715	0.695339	2.185	0.350202	0.483914	0.687916
ILL.rimO-BSU25430.1~1356	1.682	0.293884	0.368487	0.647203	1.832	0.349265	0.4181	0.629088	1.769	0.361405	0.42191	0.615888	2.349	0.38149	0.460867	0.628577
ILL.ybxF-BSU01090.1~249	1.637	0.289427	0.359663	0.635735	1.799	0.307684	0.380774	0.631324	1.608	0.363444	0.374394	0.55634	1.335	0.298632	0.336289	0.594439
ILL.proA-BSU13130.12~1259	1.881	0.276554	0.369923	0.672625	1.324	0.256407	0.306099	0.628537	1.582	0.259719	0.308501	0.621458	1.723	0.26209	0.329791	0.648321
ILL.rok-BSU14240.26~601	1.87	0.272557	0.365922	0.667567	1.649	0.273581	0.367125	0.675165	1.937	0.32535	0.396454	0.630494	1.585	0.303578	0.360962	0.627043
ILL.yabB-BSU00340.59~802	1.827	0.230113	0.372371	0.746321	1.42	0.276128	0.347796	0.650233	1.885	0.25168	0.386994	0.728379	1.964	0.245926	0.366061	0.716059
ILL.yfkC-BSU07940.1~843	1.706	0.215709	0.364912	0.764473	1.853	0.256223	0.358716	0.68874	2.102	0.268388	0.387162	0.69556	1.677	0.228968	0.362378	0.737652
ILL.moaE-BSU14300.1~474	1.471	0.32361	0.354837	0.589711	2.32	0.41861	0.483525	0.612299	2.441	0.550369	0.638942	0.61528	2.481	0.534921	0.63388	0.626599
ILL.yhcW-BSU09240.24~686	2.284	0.283142	0.38753	0.673494	2.161	0.386164	0.460559	0.625363	3.853	0.457877	0.694531	0.716102	2.75	0.412644	0.643303	0.736282
ILL.yvdD-BSU34640.35~610	1.728	0.247869	0.372837	0.721398	1.524	0.31779	0.378163	0.622687	1.822	0.330964	0.461329	0.693194	2.079	0.31235	0.461303	0.715283
ILL.pyrH-BSU16510.146~868	1.882	0.337281	0.365791	0.585145	2.514	0.409548	0.482766	0.619262	2.741	0.499783	0.587843	0.618514	2.894	0.493844	0.541696	0.588267
ILL.ywtG-BSU35830.1~1374	2.621	0.152493	0.401893	0.883725	1.06	0.217799	0.26188	0.63069	0.965	0.212193	0.229477	0.580889	1.675	0.177838	0.300716	0.759237
ILL.ypgR-BSU21880.6~1139	1.558	0.266221	0.355524	0.674265	1.551	0.310877	0.37115	0.62988	2.243	0.353549	0.477561	0.678568	1.924	0.311233	0.404188	0.661821
ILL.yhcH-BSU09080.17~934	1.787	0.306807	0.378384	0.642275	1.663	0.333081	0.398099	0.628224	2.528	0.396534	0.564325	0.69813	2.643	0.403893	0.566427	0.694365
ILL.natB-BSU09900.1~1260	1.867	0.250199	0.379793	0.719526	1.926	0.299516	0.394442	0.667875	2.702	0.328508	0.506075	0.728796	2.475	0.309947	0.498965	0.743114
ILL.yisK-BSU10750.23~928	1.551	0.29501	0.362614	0.638379	1.702	0.359874	0.438604	0.636983	3.984	0.57003	0.768269	0.678848	2.497	0.410454	0.536342	0.661496
ILL.yjeA-BSU12100.77~1480	1.869	0.263824	0.375871	0.696113	2.134	0.328243	0.429736	0.663194	2.866	0.354632	0.586103	0.755015	3.795	0.354094	0.583197	0.747271
ILL.yxaB-BSU40030.1~1032	1.804	0.220587	0.367079	0.757173	1.872	0.303278	0.396523	0.665345	1.866	0.289869	0.42456	0.710869	2.506	0.239814	0.426263	0.776151
ILL.tcyP-BSU09130.18~1409	1.732	0.241216	0.376738	0.733929	1.346	0.201052	0.261149	0.662194	1.657	0.226618	0.310322	0.678475	0.905	0.175997	0.220954	0.650051
ILL.scpA-BSU23220.38~793	1.973	0.290377	0.372537	0.654382	2.365	0.37815	0.461678	0.633962	2.261	0.44319	0.541209	0.637405	2.82	0.410077	0.541429	0.664561
ILL.xylA-BSU17600.85~1422	1.745	0.268243	0.364688	0.680732	1.486	0.336003	0.361735	0.586031	1.721	0.308996	0.397641	0.659873	1.31	0.263383	0.306593	0.615906
ILL.ykoX-BSU13430.11~676	1.571	0.263622	0.35361	0.67552	1.603	0.309016	0.366586	0.626375	2.848	0.413519	0.586622	0.698338	2.496	0.359787	0.526781	0.706637
ILL.yaaK-BSU00200.24~347	1.924	0.352348	0.368989	0.56365	2.335	0.460826	0.545255	0.622273	2.777	0.591118	0.646978	0.586696	2.37	0.558528	0.613472	0.59139
ILL.yvlB-BSU35120.25~1122	2.16	0.32386	0.382069	0.615168	1.847	0.362697	0.438284	0.633233	2.854	0.472783	0.53547	0.600326	2.287	0.430296	0.500949	0.615799
ILL.ktrC-BSU14510.1~666	1.79	0.292262	0.370522	0.651482	2.177	0.357988	0.481703	0.676717	2.796	0.424114	0.575552	0.682143	2.119	0.384509	0.498649	0.661088
ILL.prsA-BSU09950.55~933	1.588	0.317031	0.365913	0.611884	1.961	0.362029	0.456047	0.650232	2.715	0.500192	0.605197	0.629586	2.632	0.455617	0.547908	0.626809
ILL.ytcI-BSU29560.23~1612	2.005	0.297821	0.375482	0.647733	2.139	0.375781	0.451613	0.630804	3.242	0.465279	0.623663	0.675035	3.434	0.492928	0.7203	0.709756
ILL.ydfA-BSU05340.13~1320	2.408	0.200416	0.39251	0.806731	2.291	0.232877	0.360052	0.726377	3.194	0.258067	0.459237	0.775655	3	0.227633	0.44379	0.806579
ILL.ohrB-BSU13160.1~411	1.575	0.224668	0.3759	0.75907	0.79	0.267302	0.228153	0.483752	0.866	0.271342	0.216718	0.452705	1.194	0.241703	0.272271	0.600985
ILL.ybbR-BSU01760.1~1452	1.938	0.272258	0.370042	0.681163	1.603	0.29042	0.37394	0.660369	2.275	0.337659	0.472689	0.693371	2.43	0.342129	0.4747	0.688582
ILL.mreC-BSU28020.1~873	1.601	0.29237	0.358596	0.633363	1.462	0.299137	0.3586	0.627423	2.001	0.41672	0.464648	0.595195	2.32	0.386703	0.435816	0.595685
ILL.yshB-BSU28600.1~534	1.945	0.21895	0.381325	0.771512	1.837	0.317188	0.449299	0.697201	2.87	0.309019	0.545301	0.77658	3.956	0.342176	0.630743	0.785888
ILL.purK-BSU06430.1~1143	2.083	0.280668	0.379908	0.678328	2.161	0.411401	0.478086	0.616252	2.606	0.385455	0.489577	0.653765	2.197	0.32333	0.435268	0.674929
ILL.spo0A-BSU24220.193~996	1.406	0.265224	0.353783	0.676011	2.012	0.339752	0.410527	0.631717	2.65	0.420024	0.606547	0.707844	2.113	0.369737	0.480603	0.661944
ILL.yqgX-BSU24790.17~652	1.65	0.29179	0.367176	0.649641	1.581	0.329203	0.394628	0.630701	1.44	0.303756	0.364276	0.628683	2.025	0.328006	0.419245	0.654791
ILL.ydjI-BSU06210.1~972	1.429	0.275967	0.34965	0.652301	1.708	0.349987	0.43364	0.645185	3.389	0.458069	0.634803	0.689746	2.789	0.41252	0.632426	0.729454
ILL.yxzF-BSU38610.29~187	1.607	0.170494	0.373836	0.844848	1.622	0.261236	0.362004	0.686603	0.971	0.286371	0.304828	0.580547	1.448	0.298753	0.439828	0.714523
ILL.trmE-BSU41020.120~1499	1.678	0.271744	0.355102	0.664408	1.612	0.307114	0.385696	0.650721	2.167	0.39645	0.489157	0.641151	2.091	0.363148	0.481952	0.672295
ILL.recJ-BSU27620.1~2361	2.292	0.297863	0.368489	0.641117	1.793	0.316981	0.383819	0.633966	2.465	0.369537	0.463088	0.642465	2.853	0.385477	0.494651	0.652706
ILL.abh-BSU14480.56~334	1.713	0.333572	0.367132	0.591237	1.71	0.385308	0.416993	0.585252	2.069	0.444667	0.454095	0.557456	1.963	0.401642	0.403186	0.546176
ILL.hemE-BSU10120.19~1080	1.759	0.254396	0.367441	0.707077	1.702	0.322808	0.422091	0.668308	2.377	0.345	0.52431	0.726232	2.624	0.342396	0.526965	0.730176
ILL.yqjK-BSU23840.9~932	1.462	0.247046	0.360678	0.711721	1.618	0.306224	0.409103	0.67796	2.477	0.353334	0.53855	0.724782	3.383	0.307229	0.519243	0.761902
ILL.ppnK-BSU29540.58~861	1.802	0.286352	0.361005	0.649206	1.927	0.396114	0.468586	0.622768	2.815	0.426607	0.568014	0.669685	2.531	0.395701	0.504008	0.651414

[truncated: 4 more sheets: D.2, D.3, D.4, D.5]
